# Supplementary material for: The war on hTG2: warhead optimization in small molecule human tissue transglutaminase inhibitors
Source: Royal Society of Chemistry journal article supplement (doi:10.1039/d2md00378c), 2022-11-25

**The War on hTG2: Warhead Optimization in Small Molecule Human Tissue  
Transglutaminase Inhibitors**

Lavleen Mader,<sup>a</sup> Sarah K. I. Watt,<sup>a</sup> Harish R. Iyer,<sup>b</sup> Linh Nguyen,<sup>b</sup> Harpreet Kaur,<sup>b</sup>

Jeffrey W. Keillor<sup>\*a</sup>

<sup>a</sup> *Department of Chemistry and Biomolecular Sciences, University of Ottawa, Ottawa,*

*Ontario K1N 6N5, Canada.*

<sup>b</sup> *Dalriada Drug Discovery, Mississauga, Ontario L5N 8G4, Canada.*

\*Corresponding author: [jkeillor@uottawa.ca](mailto:jkeillor@uottawa.ca)

## Supplementary Information

### Table of Contents

|                                                                              |           |
|------------------------------------------------------------------------------|-----------|
| <b>hTG2 Inhibition Kinetics Data</b> .....                                   | <b>2</b>  |
| <b>Isozyme Selectivity Data</b> .....                                        | <b>7</b>  |
| <b>Intrinsic Reactivity Data</b> .....                                       | <b>11</b> |
| <b>LC-MS Data of Reaction Between 7g and GSH</b> .....                       | <b>12</b> |
| <b>HPLC Purity Analysis of Final Inhibitors</b> .....                        | <b>17</b> |
| <b>Synthesis of compound 7r</b> .....                                        | <b>26</b> |
| <b>Crystal structure of compound I3</b> .....                                | <b>26</b> |
| <b>NMR Spectra of Final Inhibitors and New Synthetic Intermediates</b> ..... | <b>27</b> |

## hTG2 Inhibition Kinetics Data:

7a

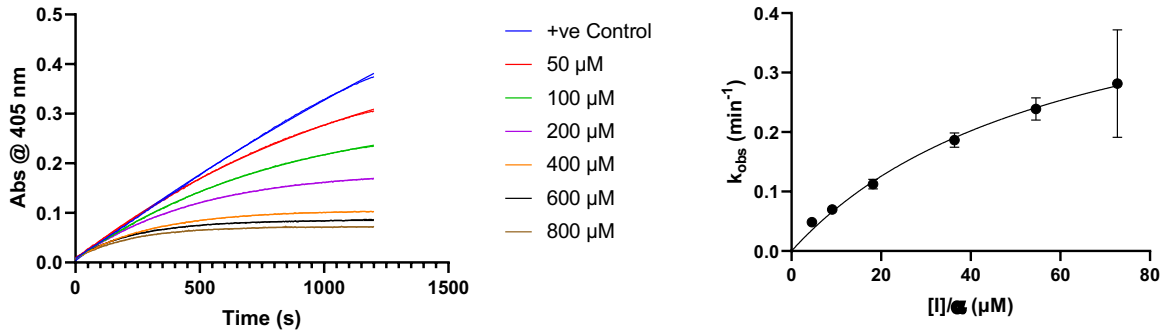

7b

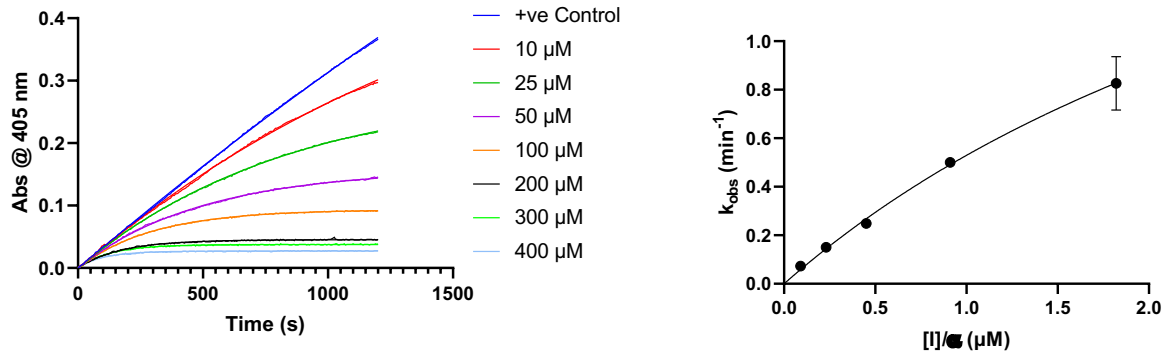

7c

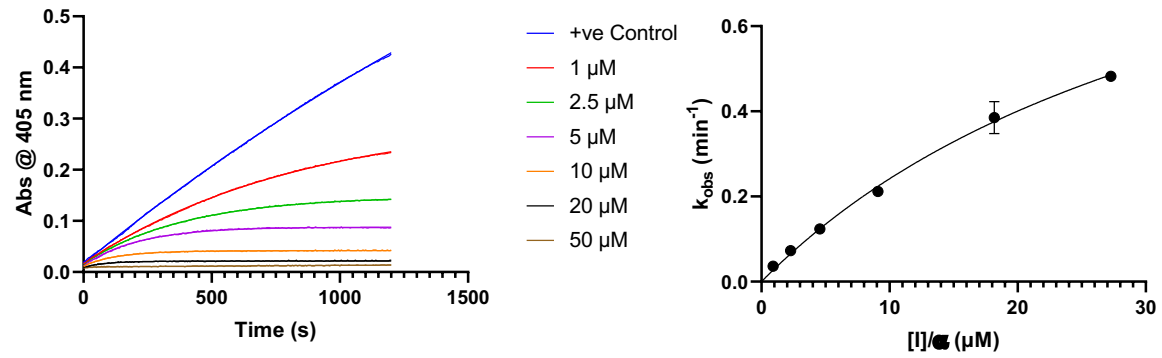

7d

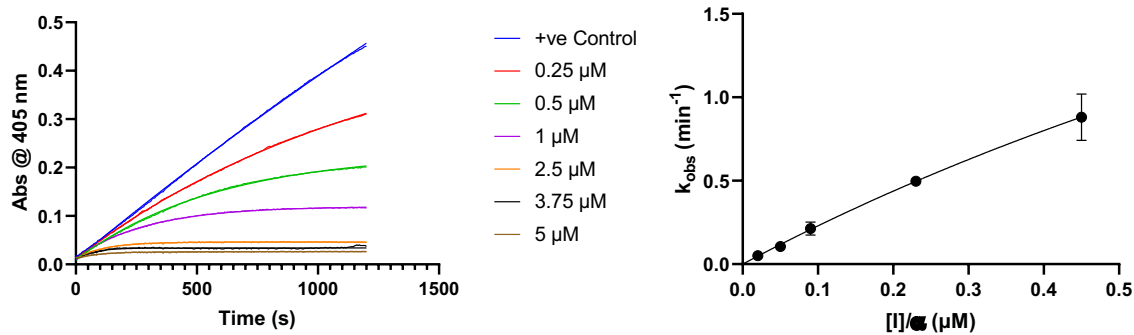

7e

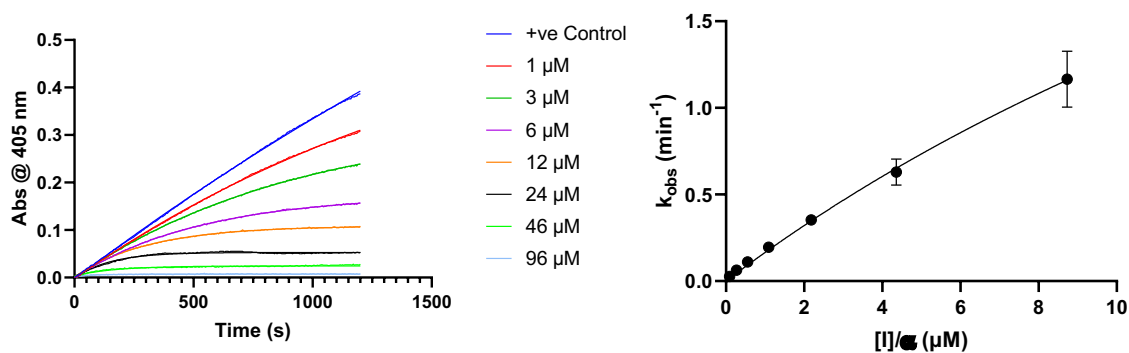

7f

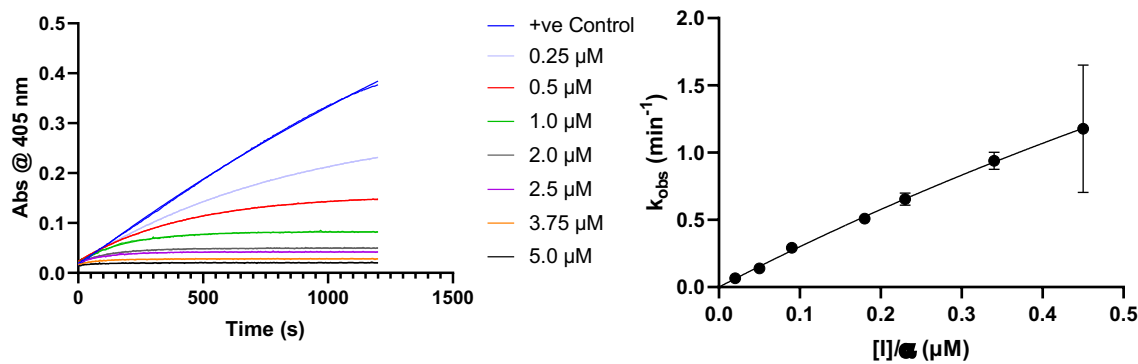

7g

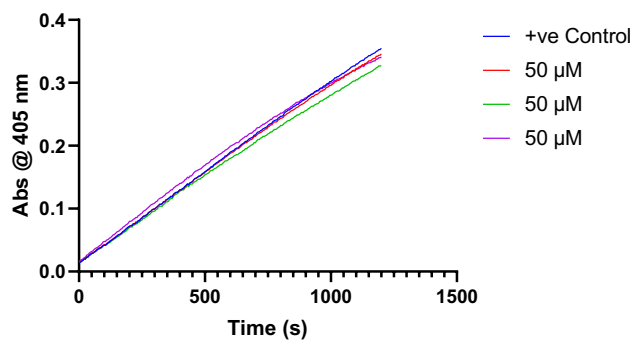

7h

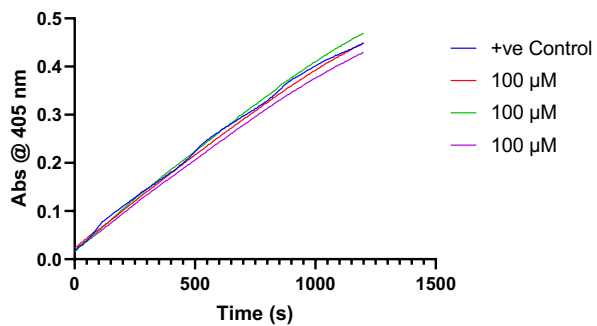

7i

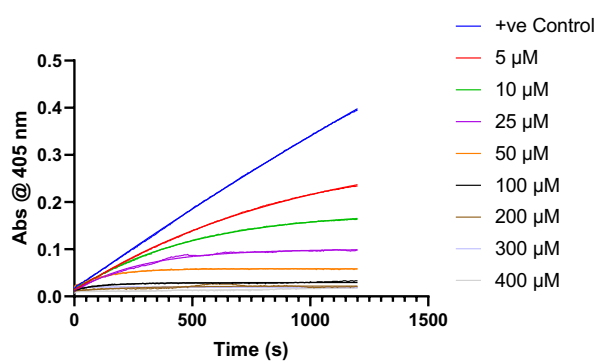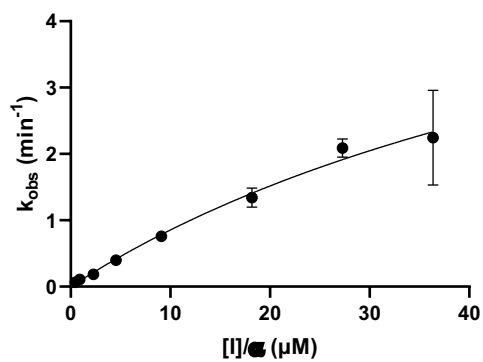

7j

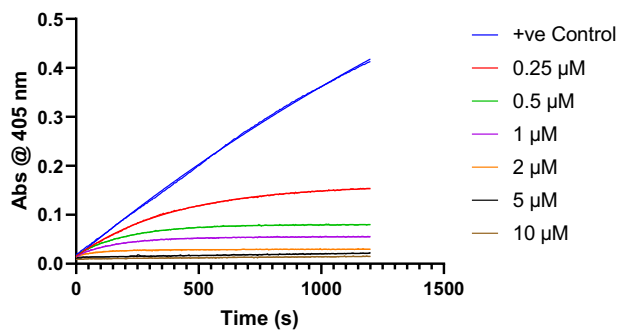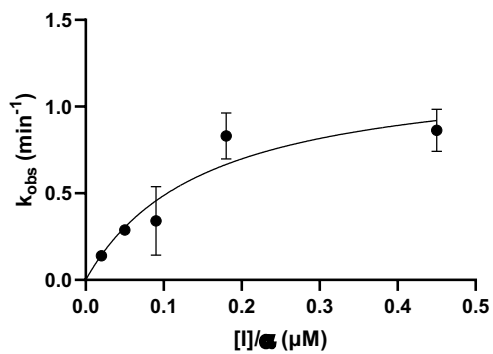

7k

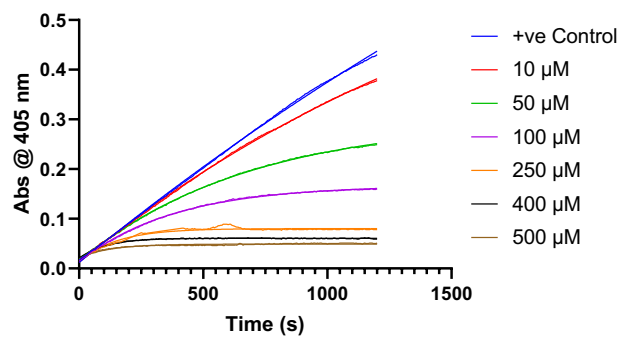



7l

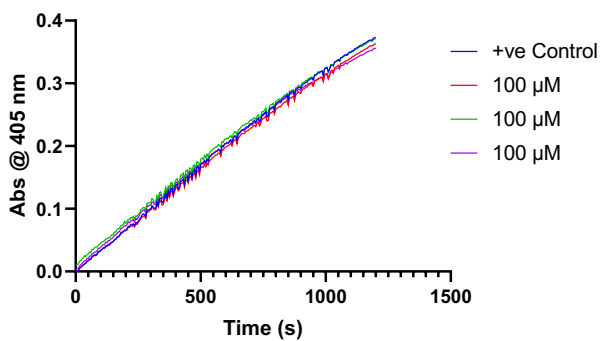

7m

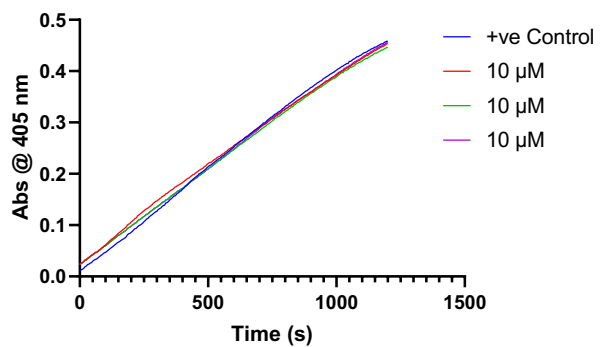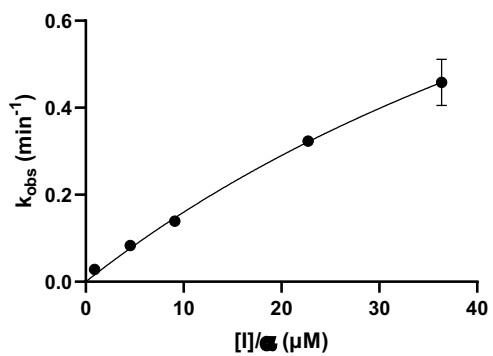

7n

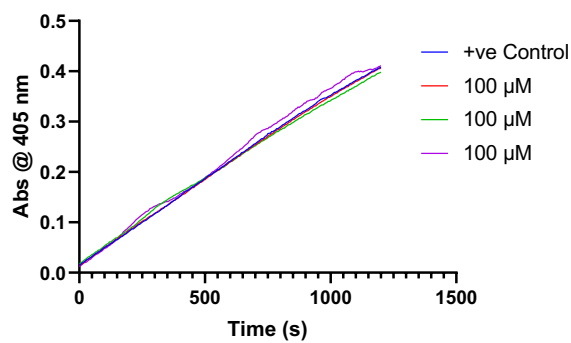

7o

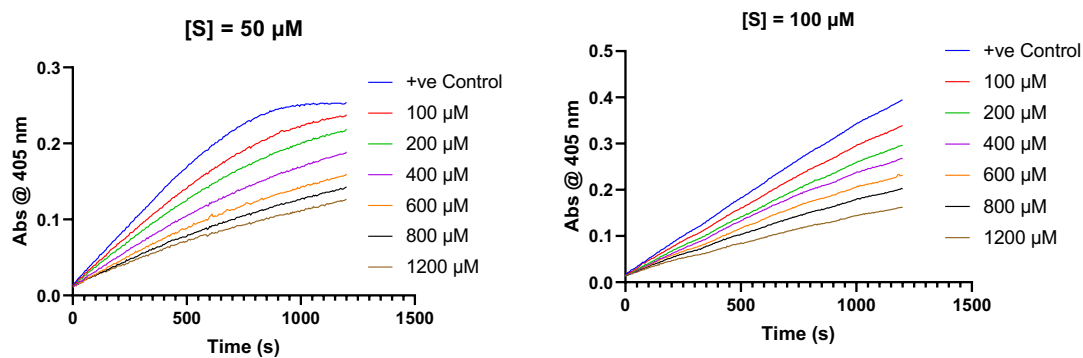

Reversibility Check ([S] = 50  $\mu\text{M}$ )

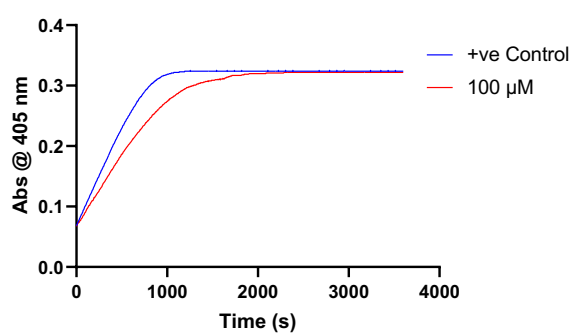

7p

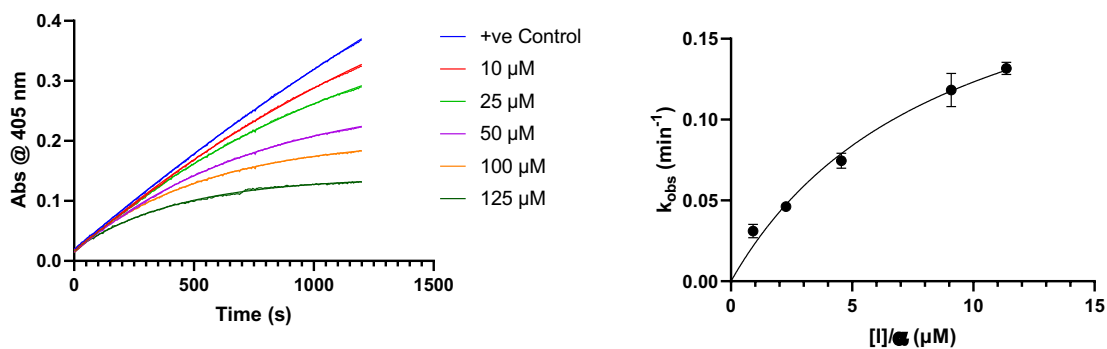

7q

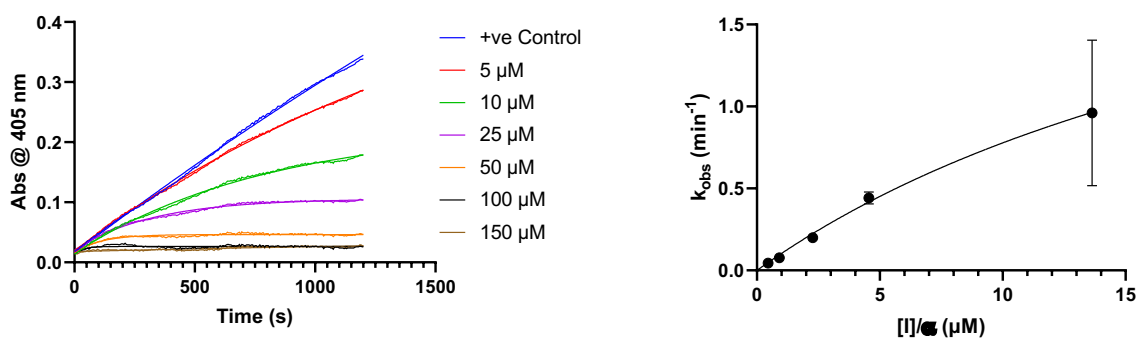

**Isozyme Selectivity Data:**

7c

**TG2**

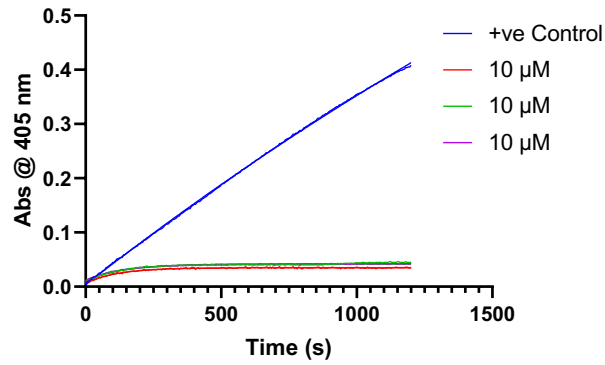

**TG1**

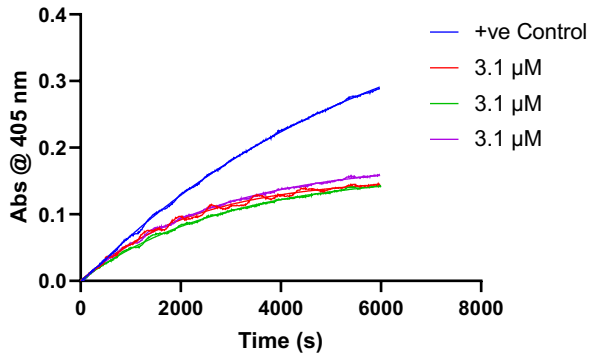

**TG6**

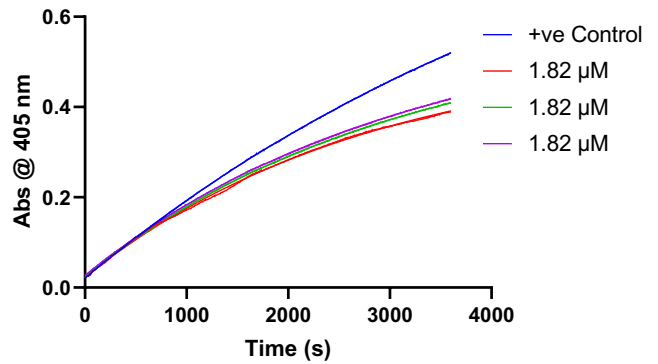

**TG3a**

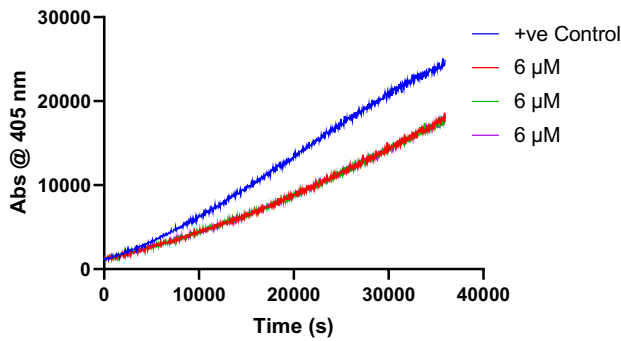

**hFXIIIa**

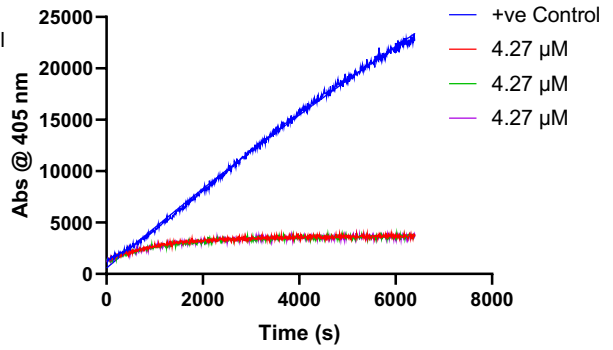

7d

TG2

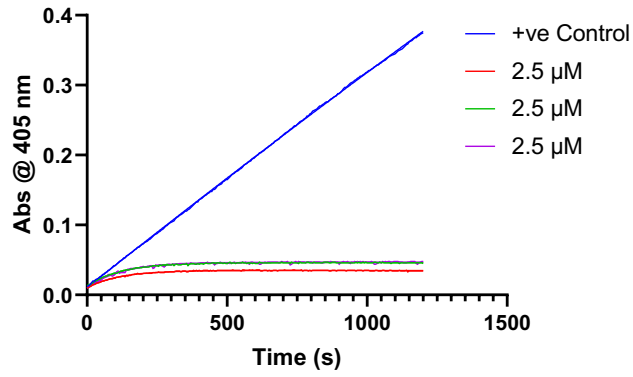

TG1

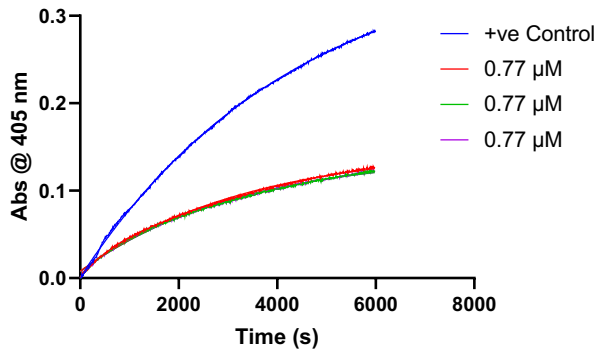

TG6

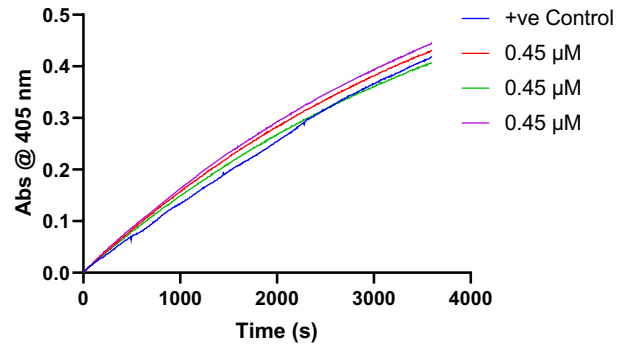

TG3a

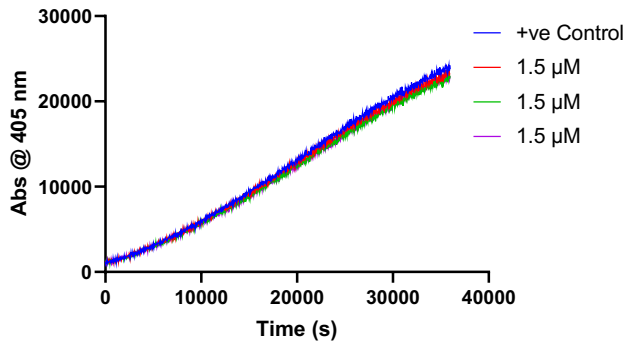

hFXIIIa

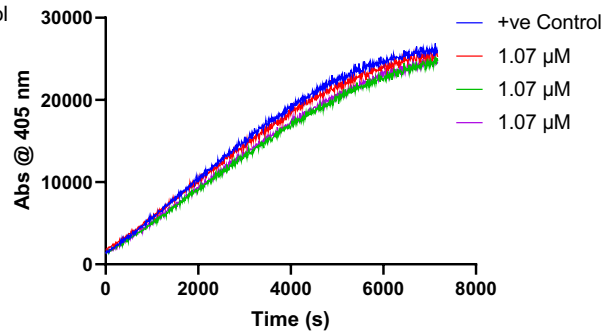

7f

TG2

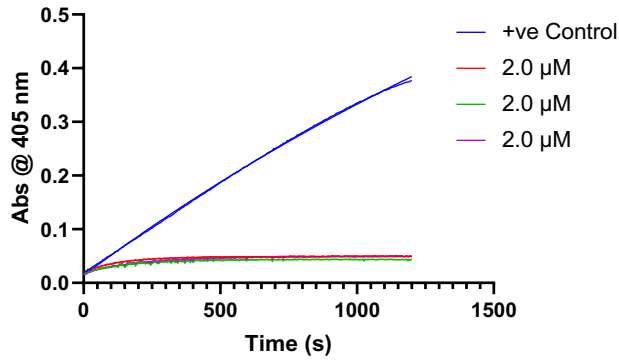

TG1

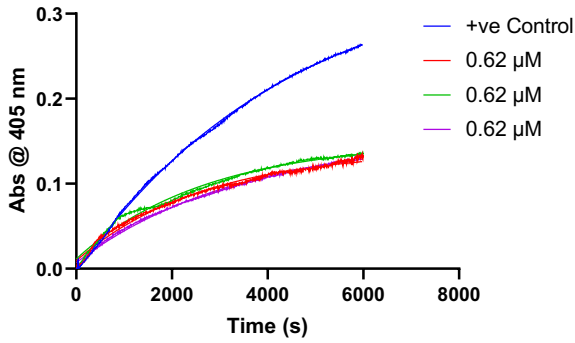

TG6

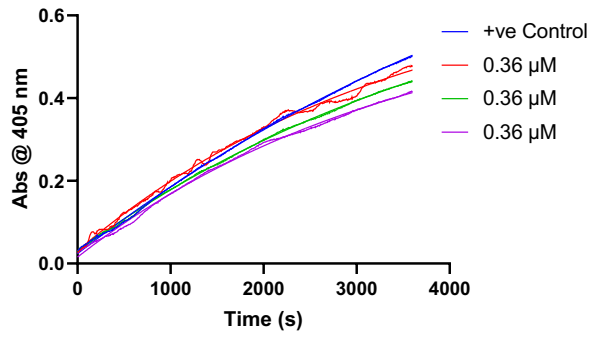

TG3a

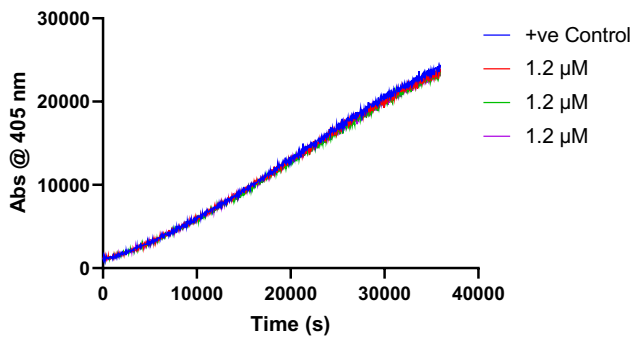

hFXIIIa

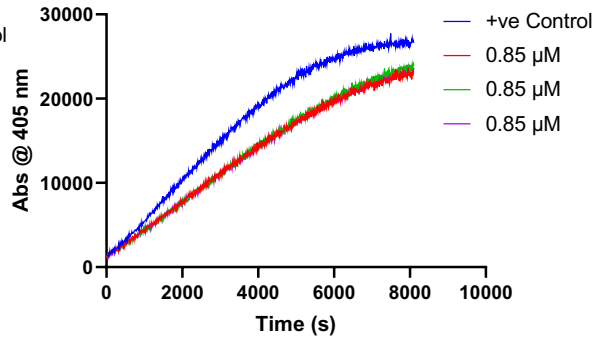

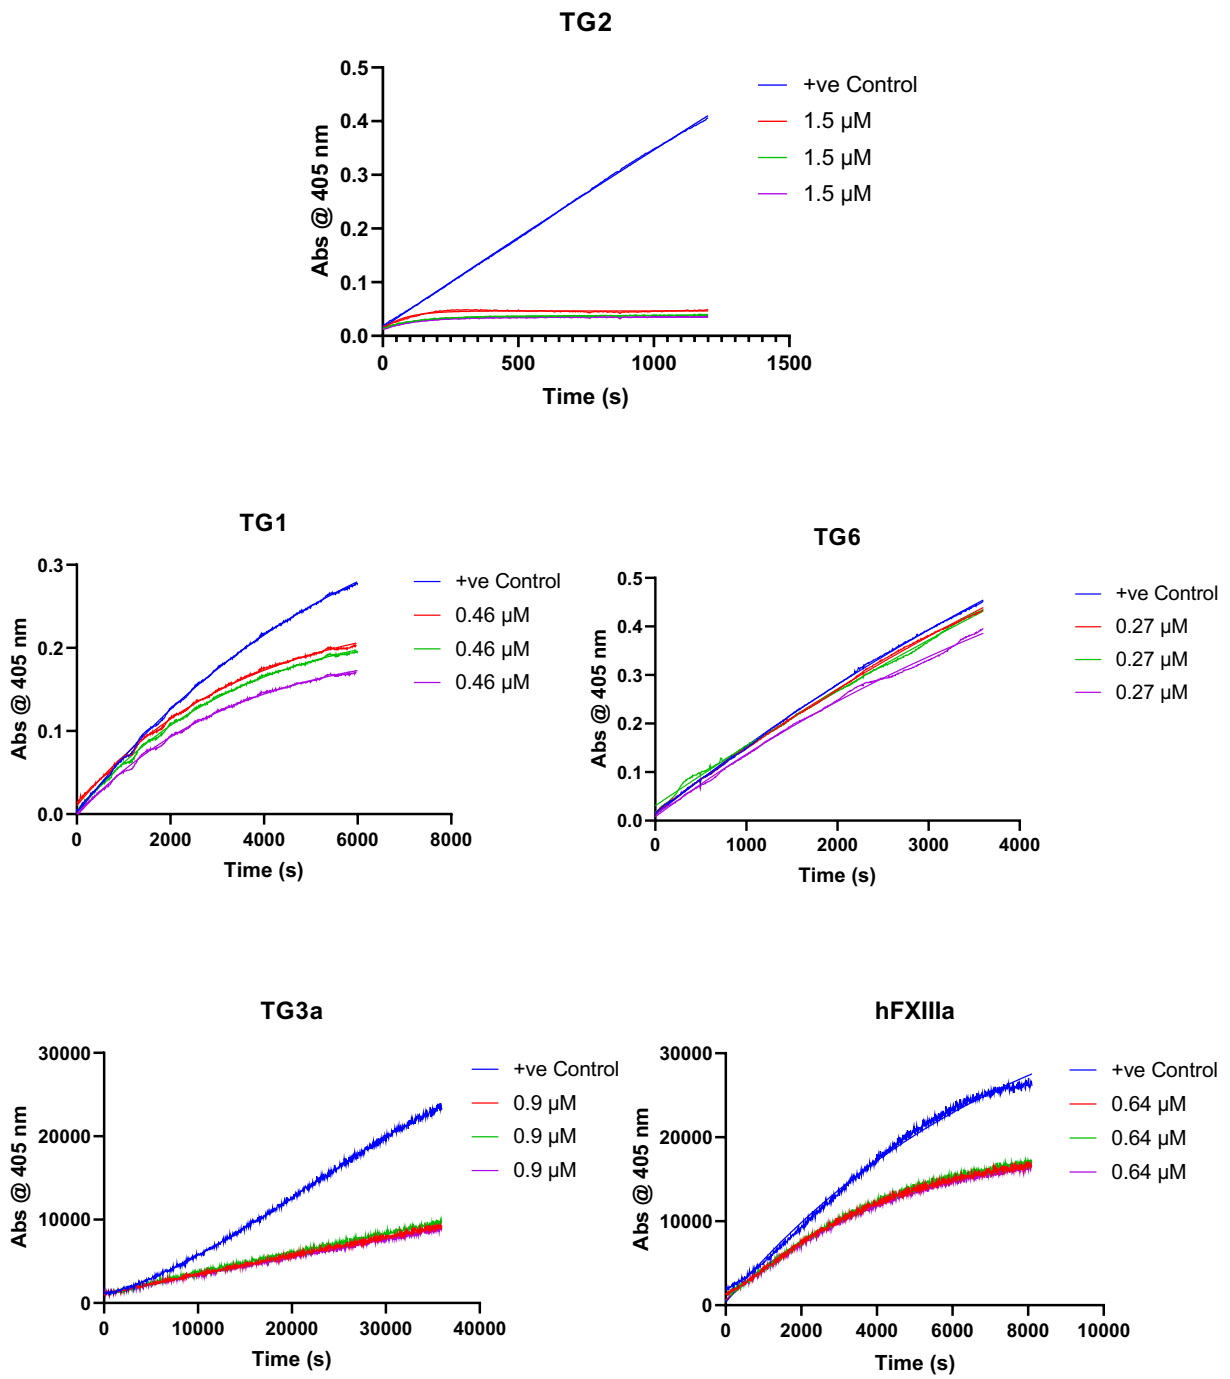

### Intrinsic Reactivity Data:

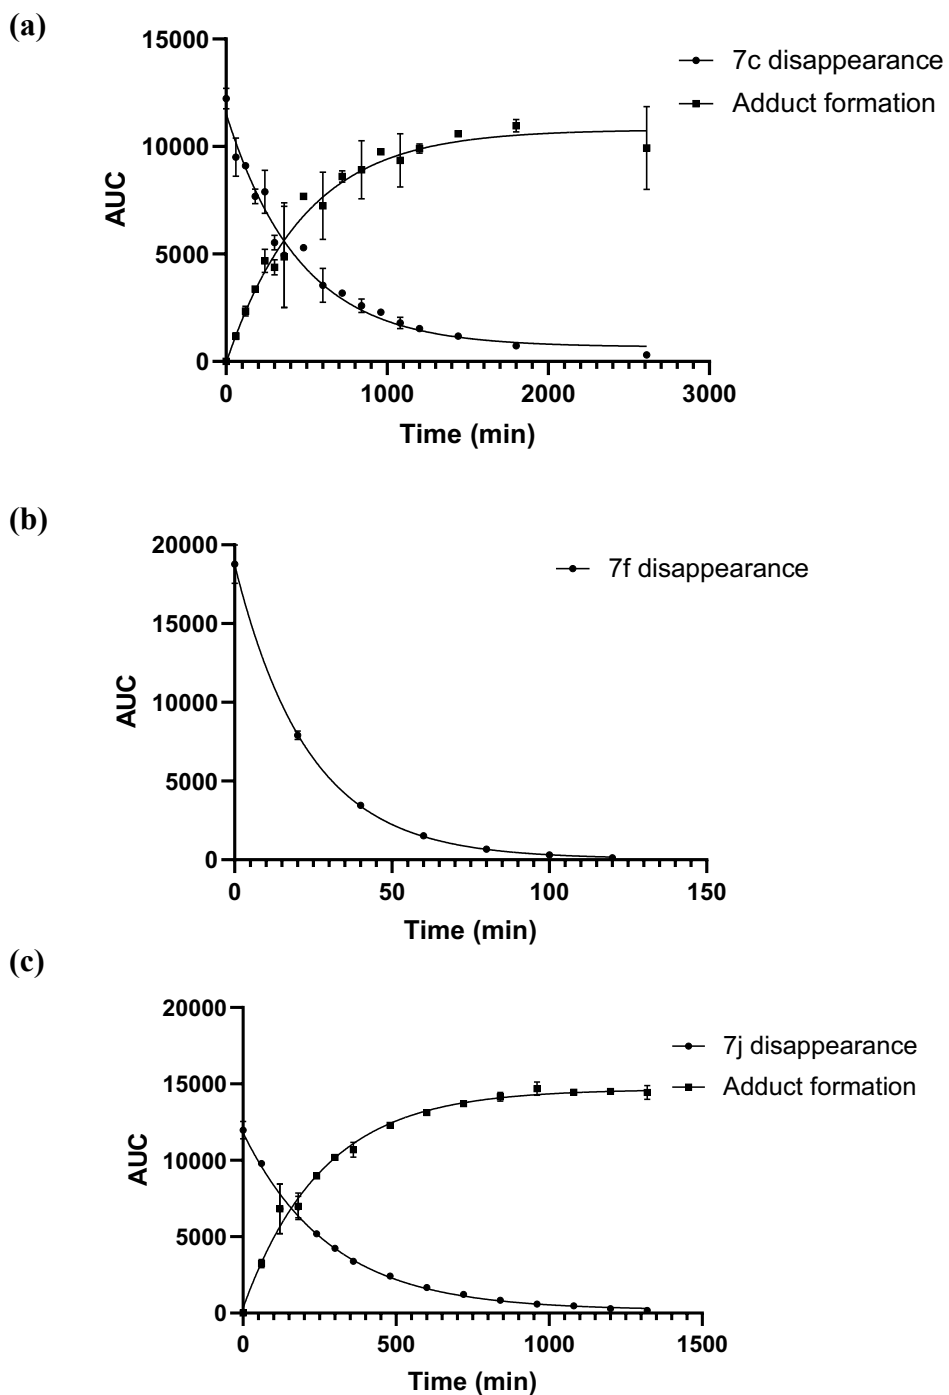

**Figure S1:** Plots representing the disappearance of inhibitor and/or appearance of thiol-inhibitor adduct. The area under the curve (AUC) were plotted over time and fitted to a mono-exponential equation to give pseudo-first order reaction rates ( $k_{obs}$ ), (a) 7c + GSH, (b) 7f + GSH, (c) 7j + GSH.

## LC-MS Data of Reaction Between 7f and GSH:

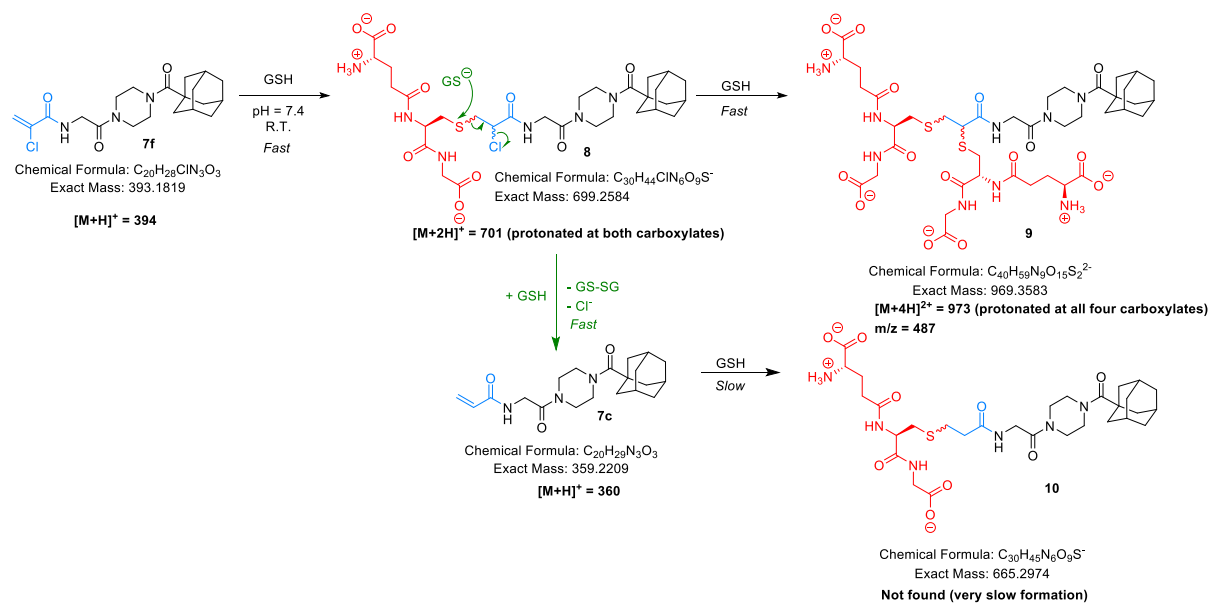

Figure S2: Products of reaction of 7f with GSH with m/z values found by LC-MS.

## Chromatograms:

(Blank)

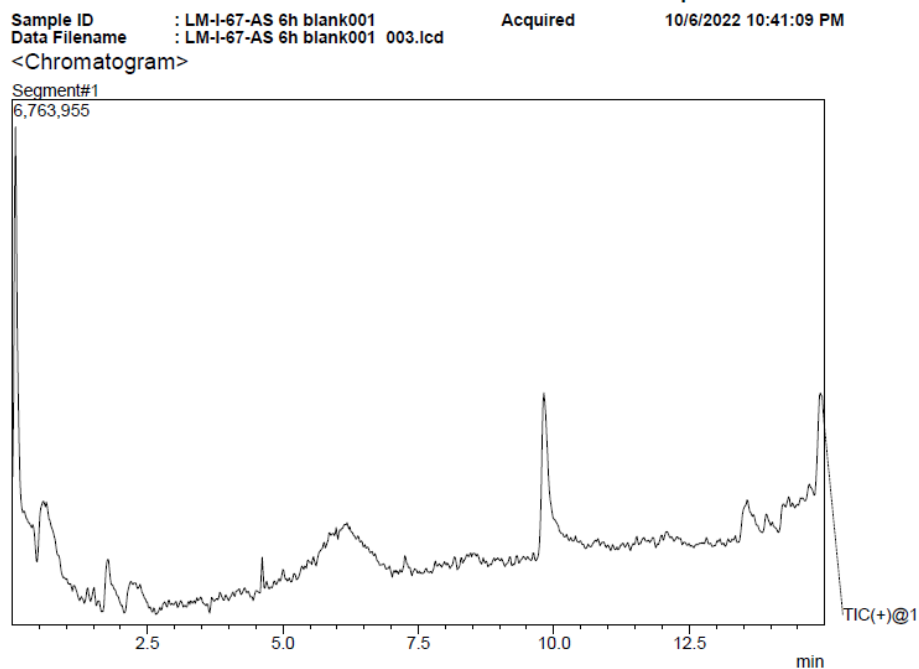



**(T = 0)**

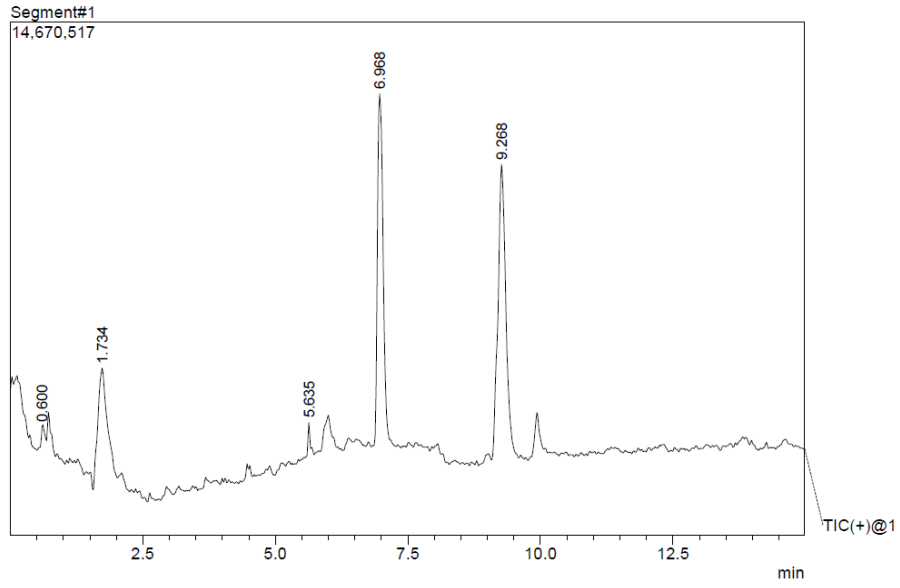

**(T = 3h)**

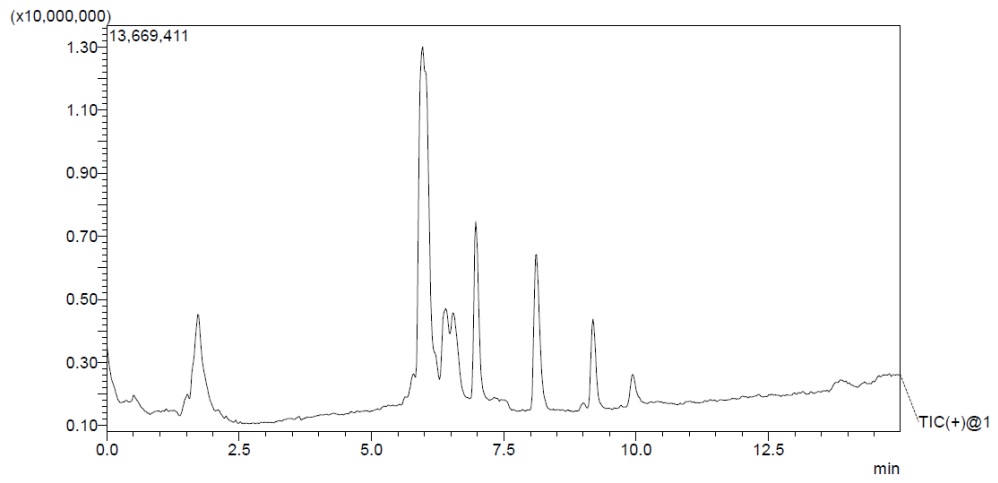

**(T = 6h)**

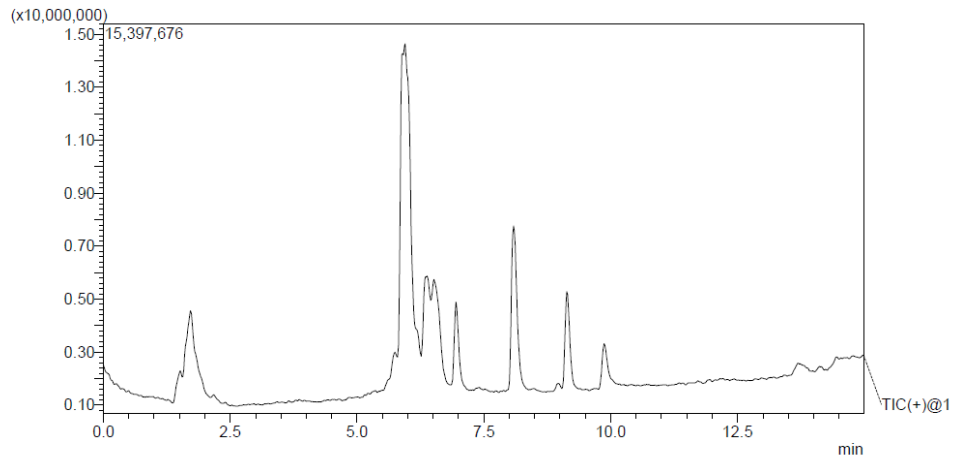

(T = 24h)

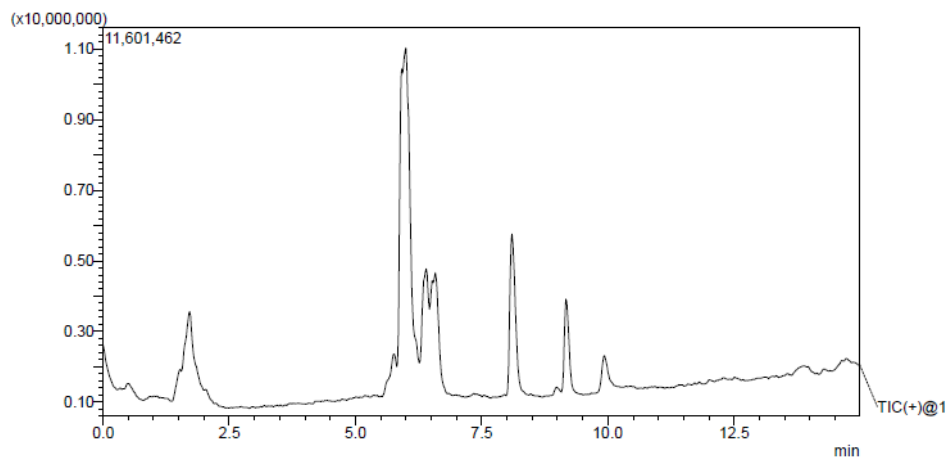

Mass Spectra of identifiable compounds (Compound, Retention Time):

(GSH, 1.717 min)

Line#:1 R.Time:1.717(Scan#:104)  
MassPeaks:1368  
RawMode:Single 1.717(104) BasePeak:308(1994432)  
BG Mode:None Segment 1 - Event 1

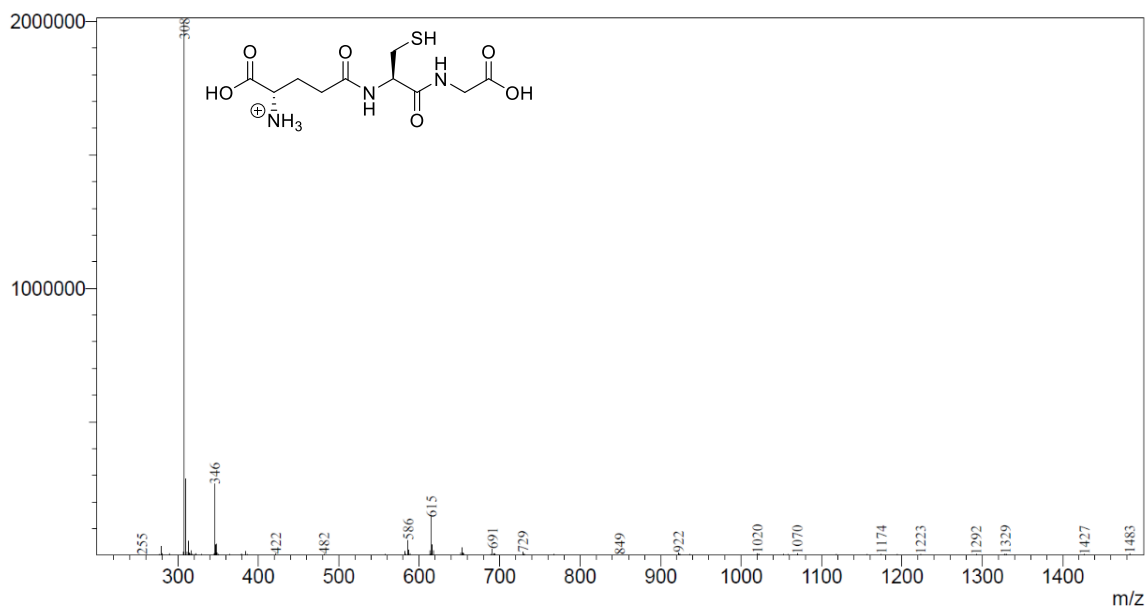

**(7f, 9.333 min)**

R.Time:9.333(Scan#:561)  
MassPeaks:1340 BasePeak:394(1636407)  
Spectrum Mode:Single 9.333(561)  
BG Mode:None Polarity:Positive Segment 1 - Event 1

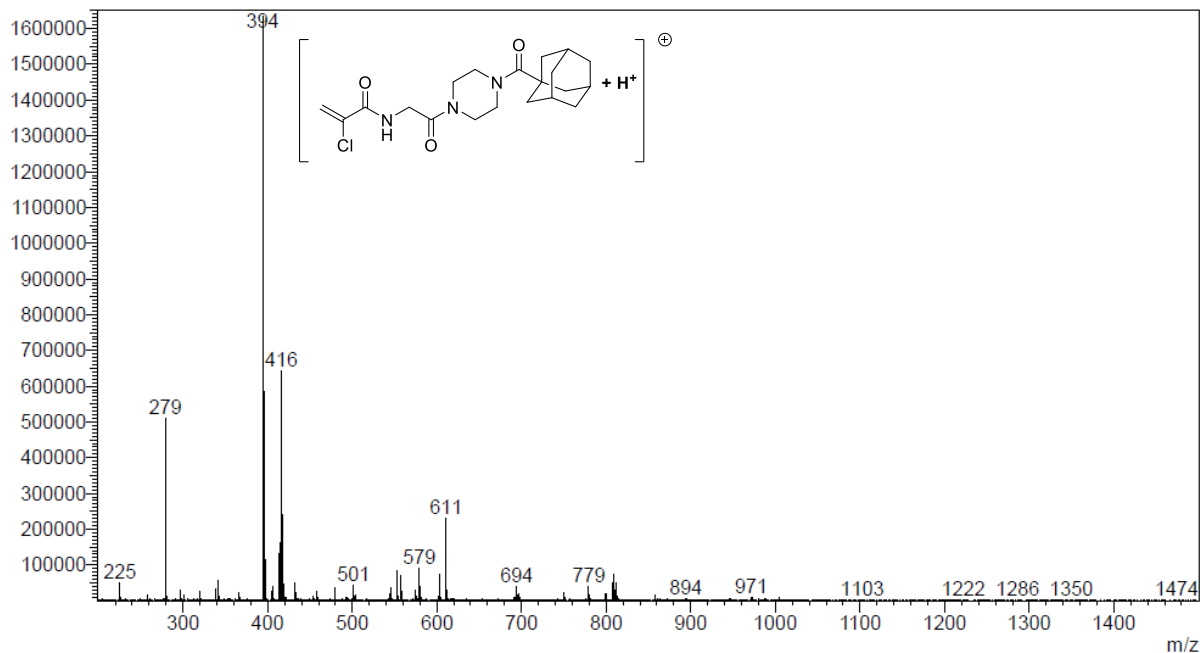

**(8, 7.350 min)**

R.Time:----(Scan#:----)  
MassPeaks:437 BasePeak:701(5239228)  
Spectrum Mode:Averaged 6.950-6.983(418-420)  
BG Mode:Calc Polarity:Positive Segment 1 - Event 1

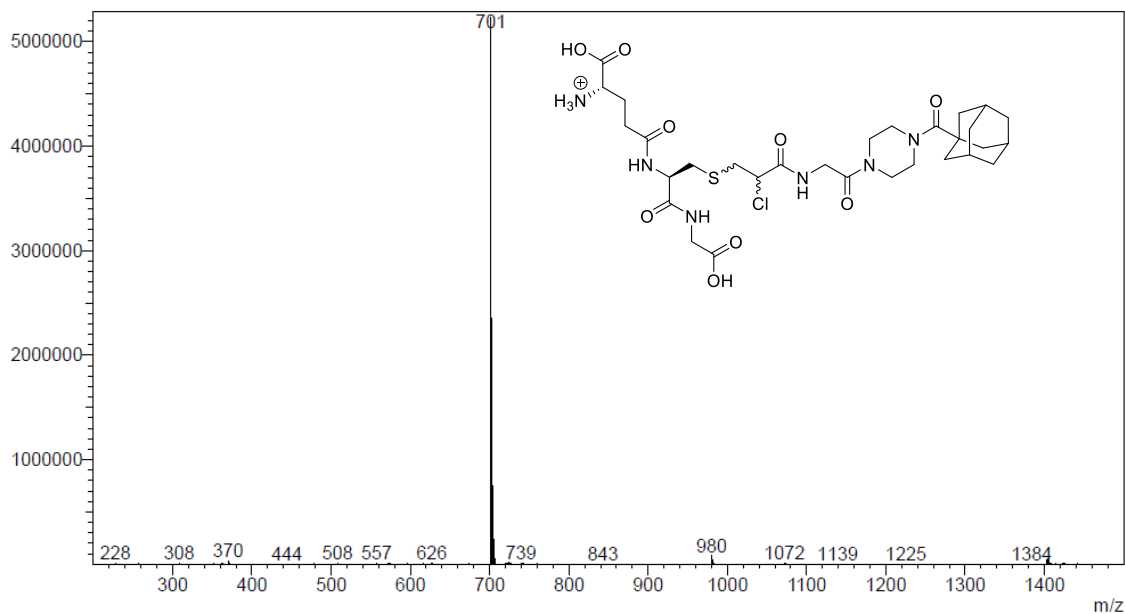

**(7c, 8.083 min)**

Line#:1 R.Time:8.083(Scan#:486)  
MassPeaks:1344  
RawMode:Single 8.083(486) BasePeak:360(1944438)  
BG Mode:None Segment 1 - Event 1

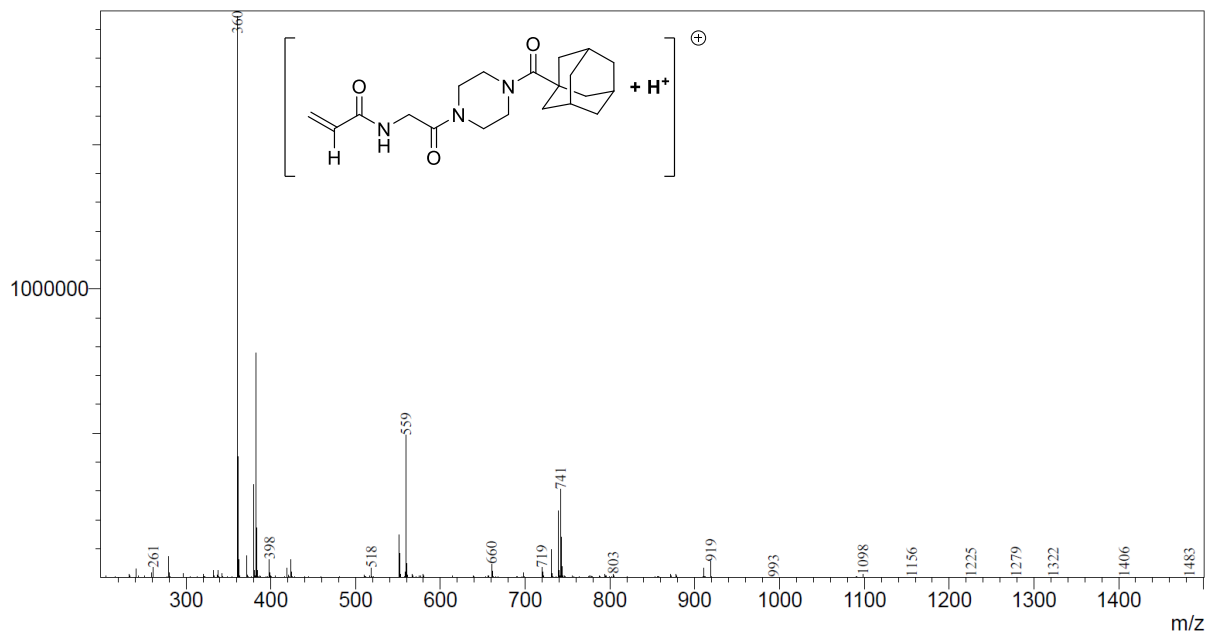

**(9, 5.933 min)**

Line#:1 R.Time:5.933(Scan#:357)  
MassPeaks:1365  
RawMode:Single 5.933(357) BasePeak:487(8044516)  
BG Mode:None Segment 1 - Event 1

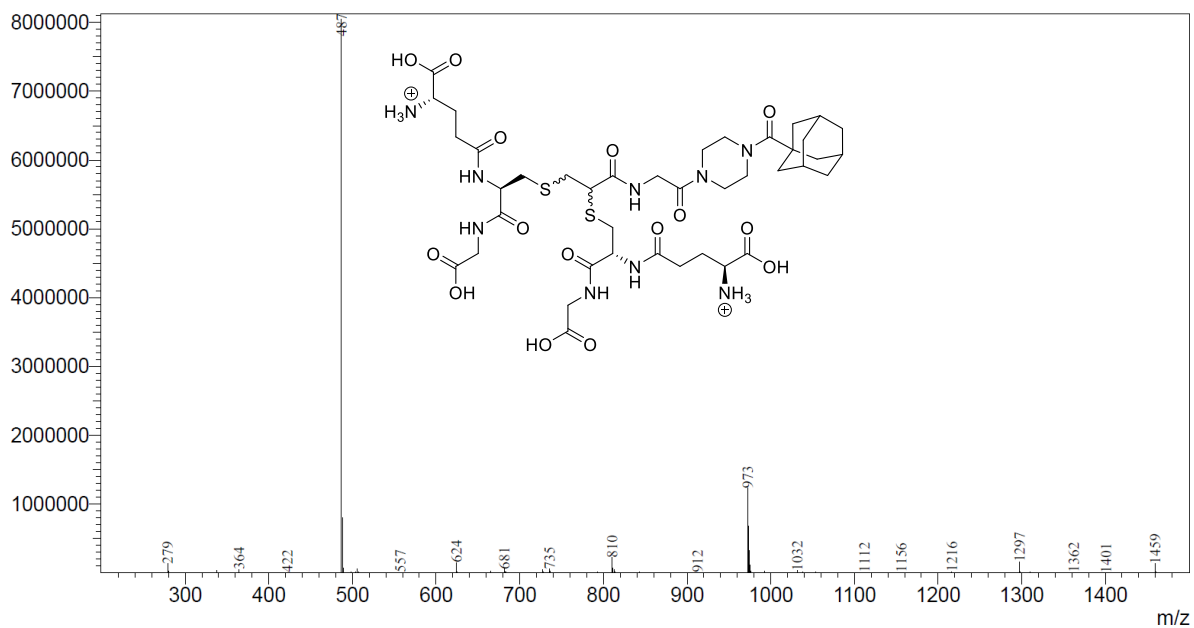

## HPLC Purity Analysis of Final Inhibitors:

| Inhibitor | Retention Time (min) | Purity (%) |
|-----------|----------------------|------------|
| 7a        | 16.295               | 99.691     |
| 7b*       | 15.017               | 100        |
| 7c*       | 12.520               | 96.285     |
| 7d        | 18.468               | 99.670     |
| 7e        | 18.838               | 93.586     |
| 7f        | 17.996               | 99.741     |
| 7g        | 17.374               | 99.824     |
| 7h        | 16.823               | 100        |
| 7i        | 16.075               | 100        |
| 7j*       | 14.270               | 98.501     |
| 7k        | 17.477               | 90.763     |
| 7l        | 15.803               | 99.702     |
| 7m        | 27.028               | 100        |
| 7n        | 18.817               | 97.148     |
| 7o        | 16.550               | 98.985     |
| 7p        | 20.905               | 100        |
| 7q        | 14.142               | 91.349     |

**Table S1:** The purity of the final inhibitors determined by Gilson-Mandel GXP271 high performance liquid chromatography (HPLC) with UV detection at 214 and 254 nm (Phenomenex Luna, 150 mm × 4.6 mm, 30 min, 1.5 mL/min flow rate, 5-95% 0.1% TFA in MeCN/0.1% TFA in H<sub>2</sub>O unless otherwise indicated). \*20-80% 0.1% TFA in MeCN/0.1% TFA in H<sub>2</sub>O

7a

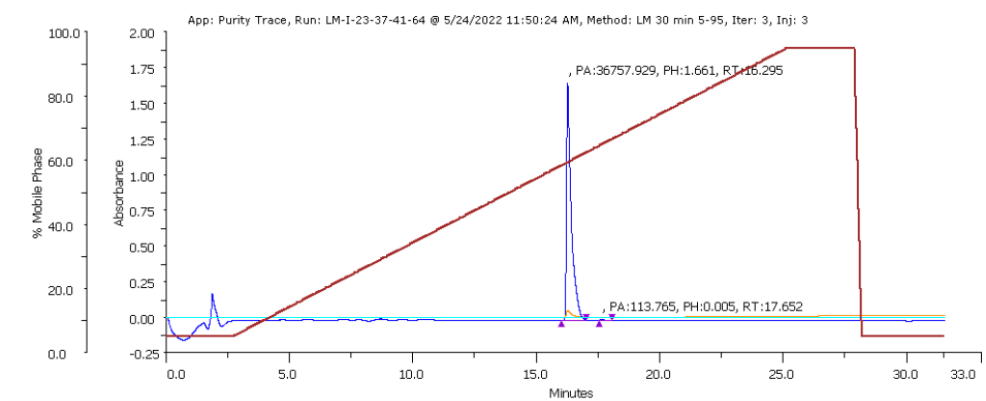

| Injection Number | Peak Name | Retention Time (min) | Area (mAUmin x100) | Height (AU) | Sample Name | Sample Location  | Fraction Site(s) | Area % |
|------------------|-----------|----------------------|--------------------|-------------|-------------|------------------|------------------|--------|
| 3                | 1         | 16.295               | 36757.9292         | 1.661       | LM-1-23     | Sample Zone->161 |                  | 99.691 |
| 3                | 2         | 17.652               | 113.7647           | 0.005       | LM-1-23     | Sample Zone->161 |                  | 0.309  |

7b

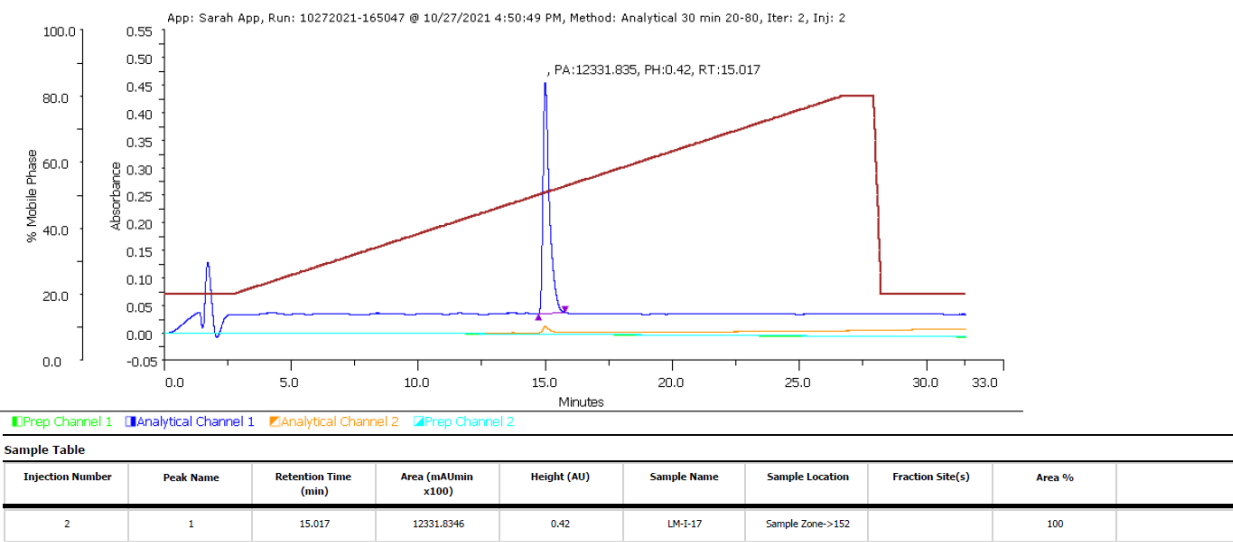

7c

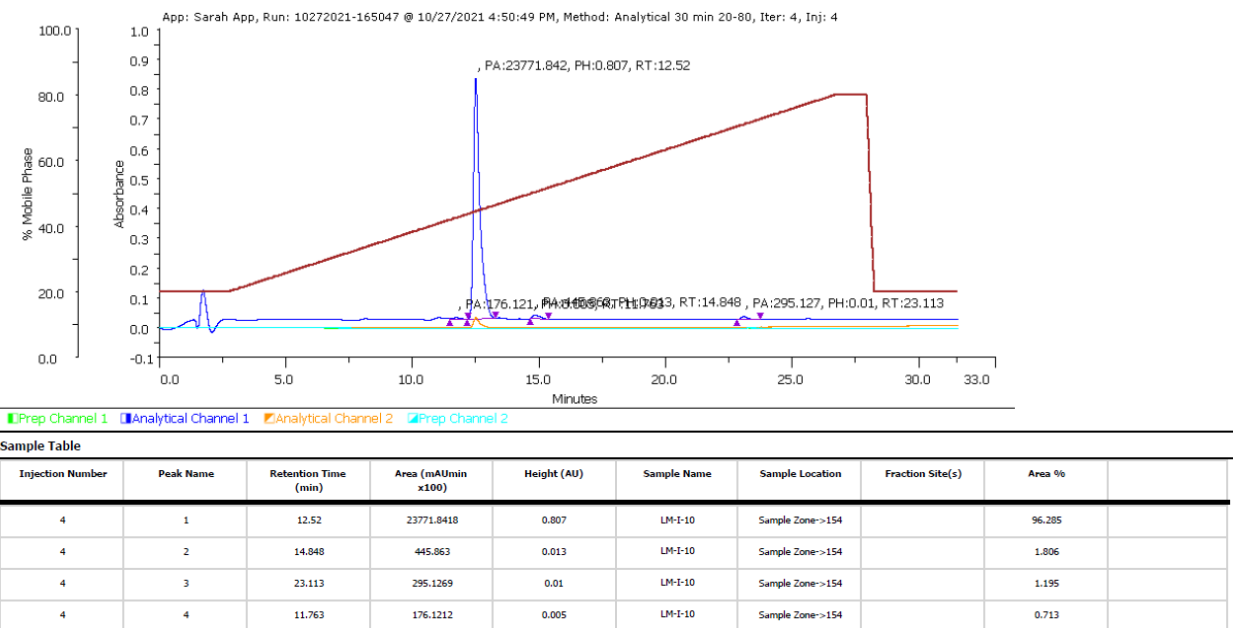

7d

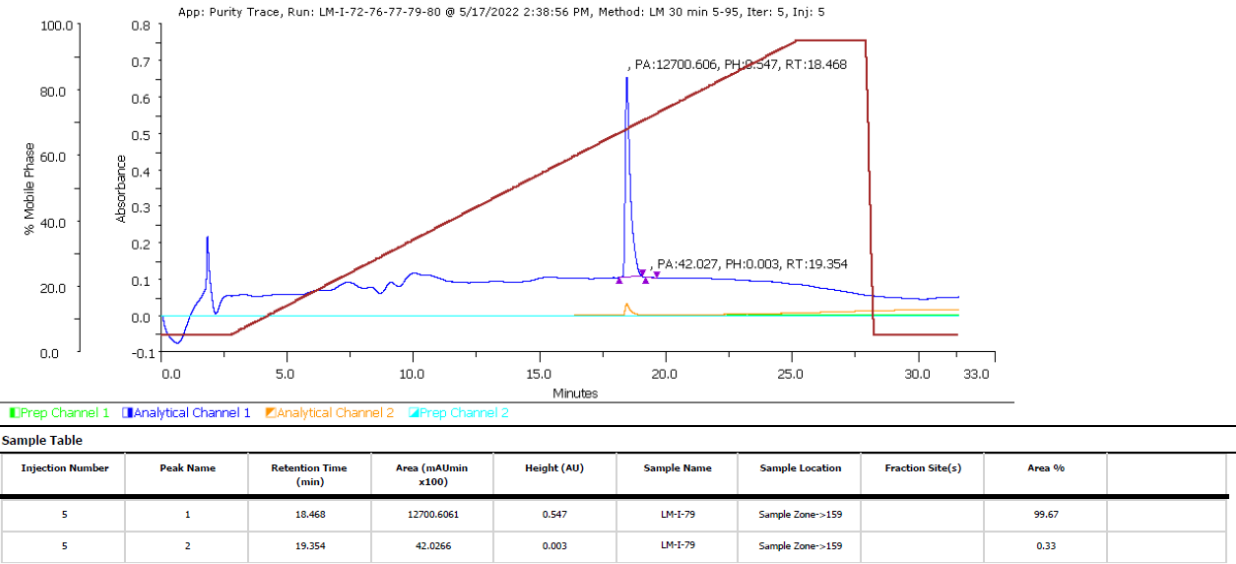

7e

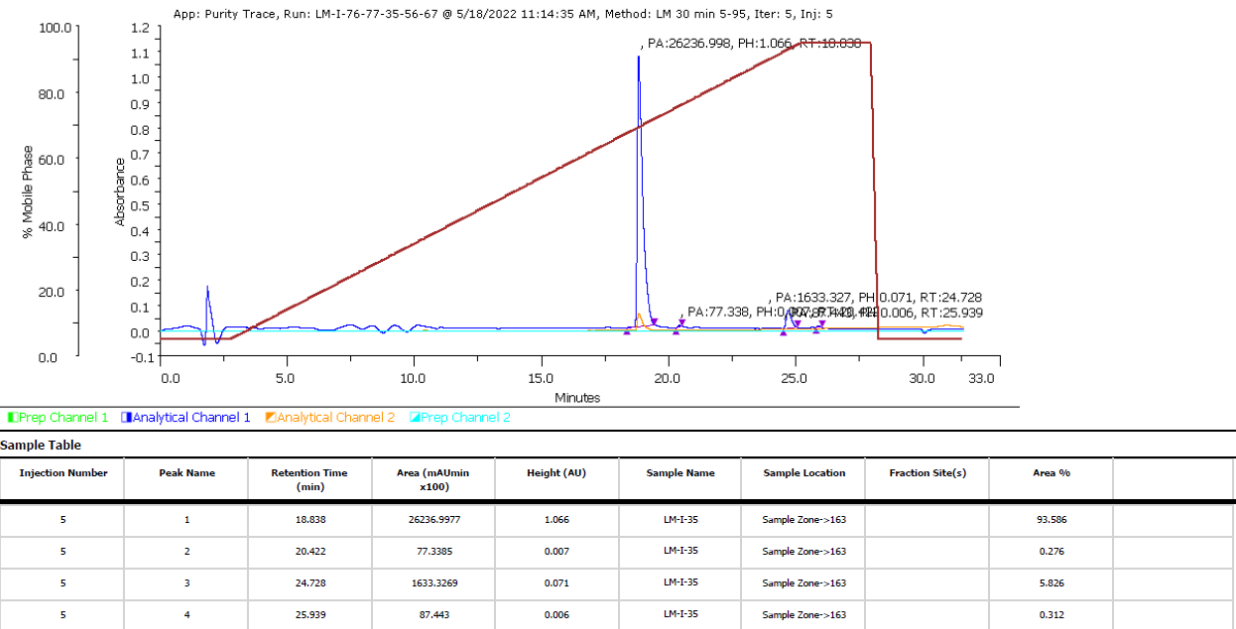

7f

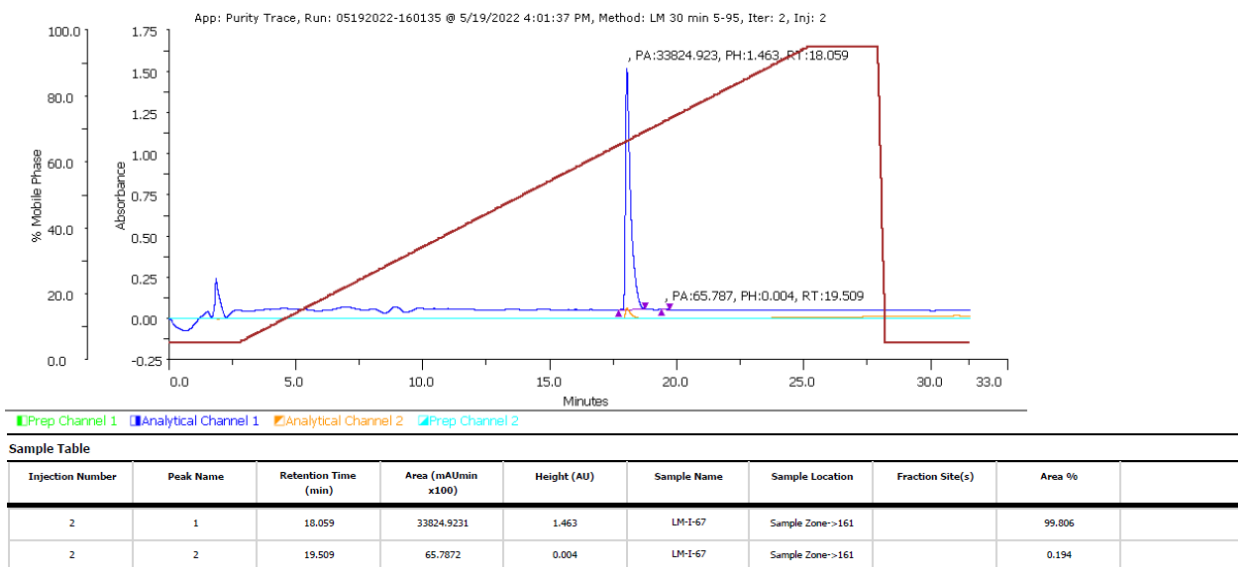

7g

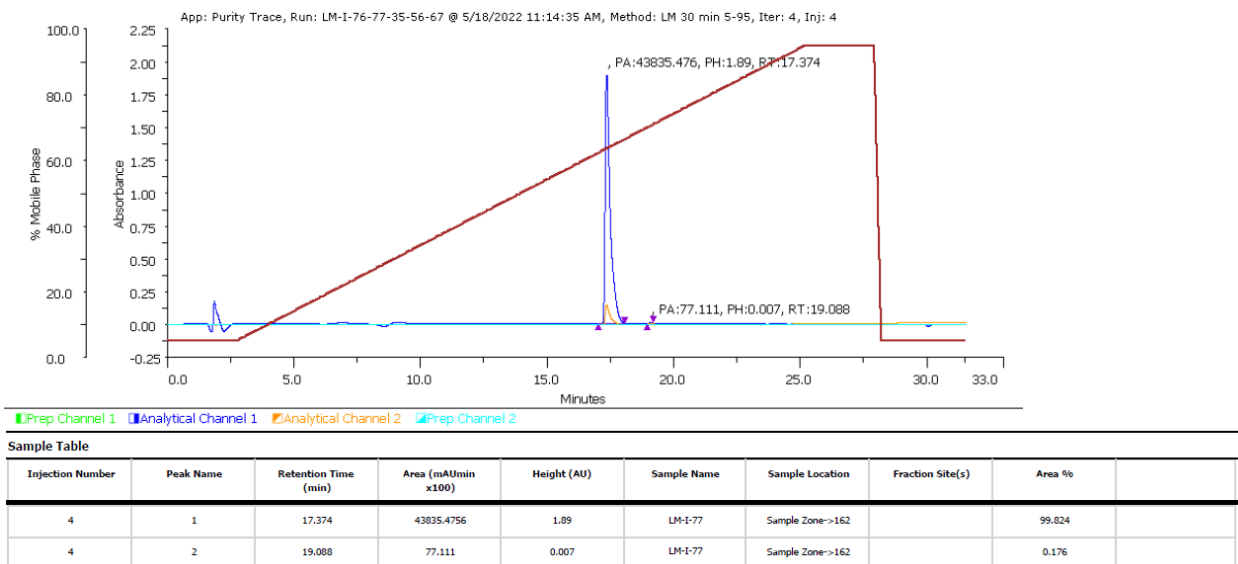



7h

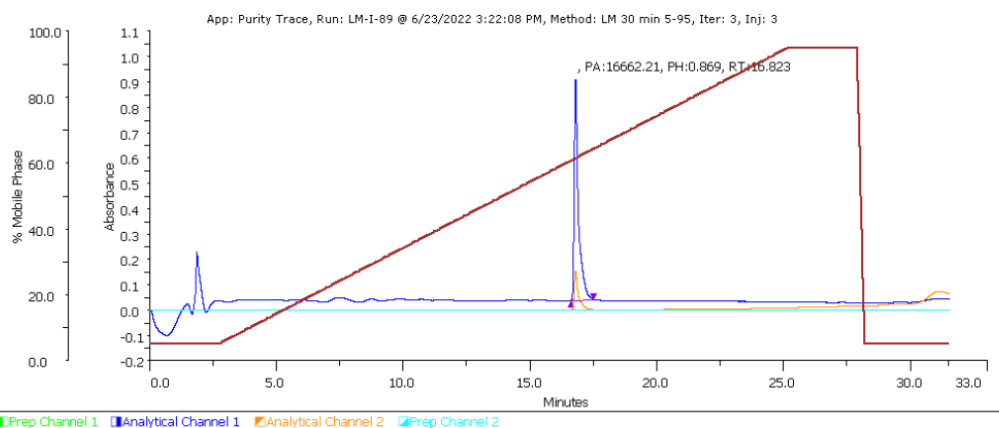

Sample Table

| Injection Number | Peak Name | Retention Time (min) | Area (mAUmin x100) | Height (AU) | Sample Name | Sample Location  | Fraction Site(s) | Area % |
|------------------|-----------|----------------------|--------------------|-------------|-------------|------------------|------------------|--------|
| 3                | 1         | 16.823               | 16662.2096         | 0.869       | LM-1-89     | Sample Zone->161 |                  | 100    |

7i

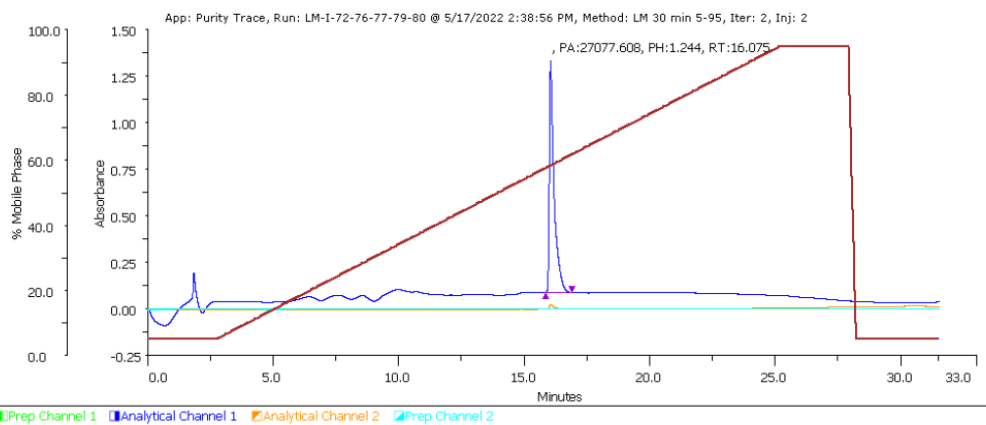

Sample Table

| Injection Number | Peak Name | Retention Time (min) | Area (mAUmin x100) | Height (AU) | Sample Name | Sample Location  | Fraction Site(s) | Area % |
|------------------|-----------|----------------------|--------------------|-------------|-------------|------------------|------------------|--------|
| 2                | 1         | 16.075               | 27077.6078         | 1.244       | LM-1-72     | Sample Zone->161 |                  | 100    |

7j

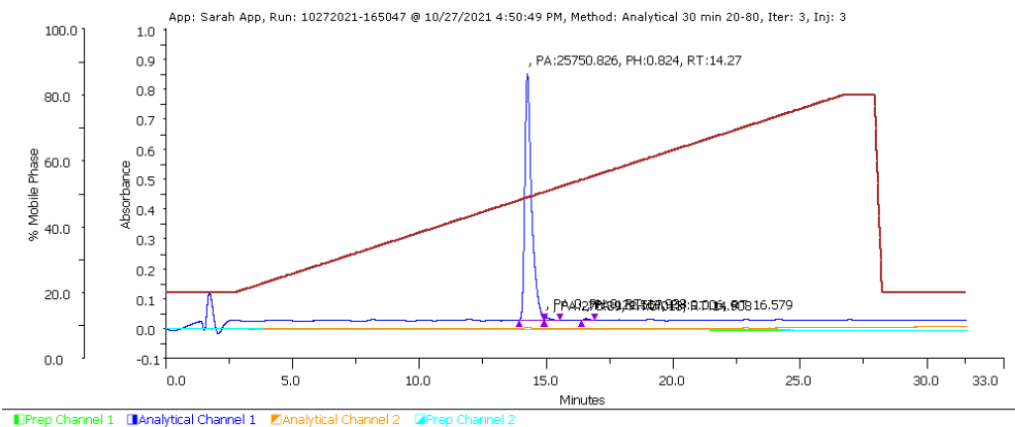

Sample Table

| Injection Number | Peak Name | Retention Time (min) | Area (nAUmin x100) | Height (AU) | Sample Name | Sample Location  | Fraction Site(s) | Area % |
|------------------|-----------|----------------------|--------------------|-------------|-------------|------------------|------------------|--------|
| 3                | 1         | 14.27                | 25750.8256         | 0.824       | LM-I-13     | Sample Zone->153 |                  | 98.501 |
| 3                | 2         | 16.579               | 121.5673           | 0.006       | LM-I-13     | Sample Zone->153 |                  | 0.465  |
| 3                | 3         | 14.933               | 0                  | 0           | LM-I-13     | Sample Zone->153 |                  | 0      |
| 3                | 4         | 14.908               | 270.3904           | 0.013       | LM-I-13     | Sample Zone->153 |                  | 1.034  |

7k

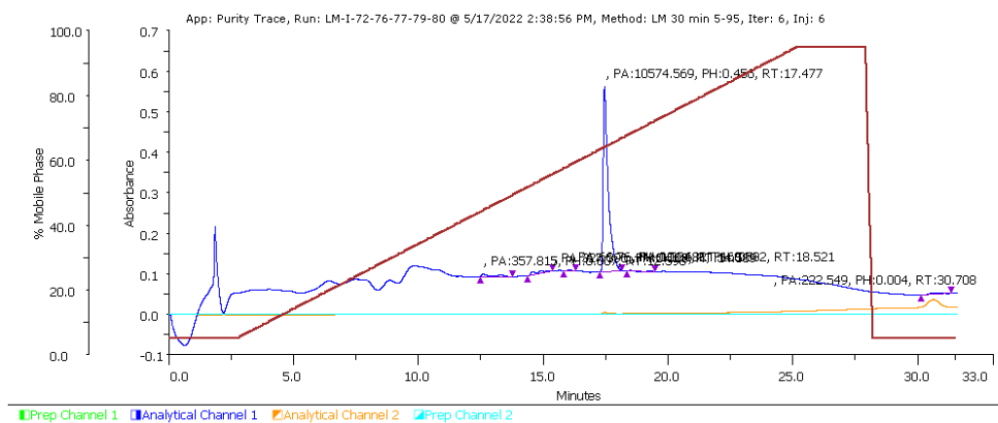

Sample Table

| Injection Number | Peak Name | Retention Time (min) | Area (nAUmin x100) | Height (AU) | Sample Name | Sample Location  | Fraction Site(s) | Area % |
|------------------|-----------|----------------------|--------------------|-------------|-------------|------------------|------------------|--------|
| 6                | 1         | 17.477               | 10574.5667         | 0.456       | LM-I-80     | Sample Zone->158 |                  | 90.763 |
| 6                | 2         | 12.598               | 357.8152           | 0.007       | LM-I-80     | Sample Zone->158 |                  | 3.071  |
| 6                | 3         | 14.589               | 327.396            | 0.008       | LM-I-80     | Sample Zone->158 |                  | 2.81   |
| 6                | 4         | 16.058               | 66.7605            | 0.004       | LM-I-80     | Sample Zone->158 |                  | 0.573  |
| 6                | 5         | 18.521               | 101.6815           | 0.002       | LM-I-80     | Sample Zone->158 |                  | 0.873  |
| 6                | 6         | 30.708               | 222.5489           | 0.004       | LM-I-80     | Sample Zone->158 |                  | 1.91   |

7l

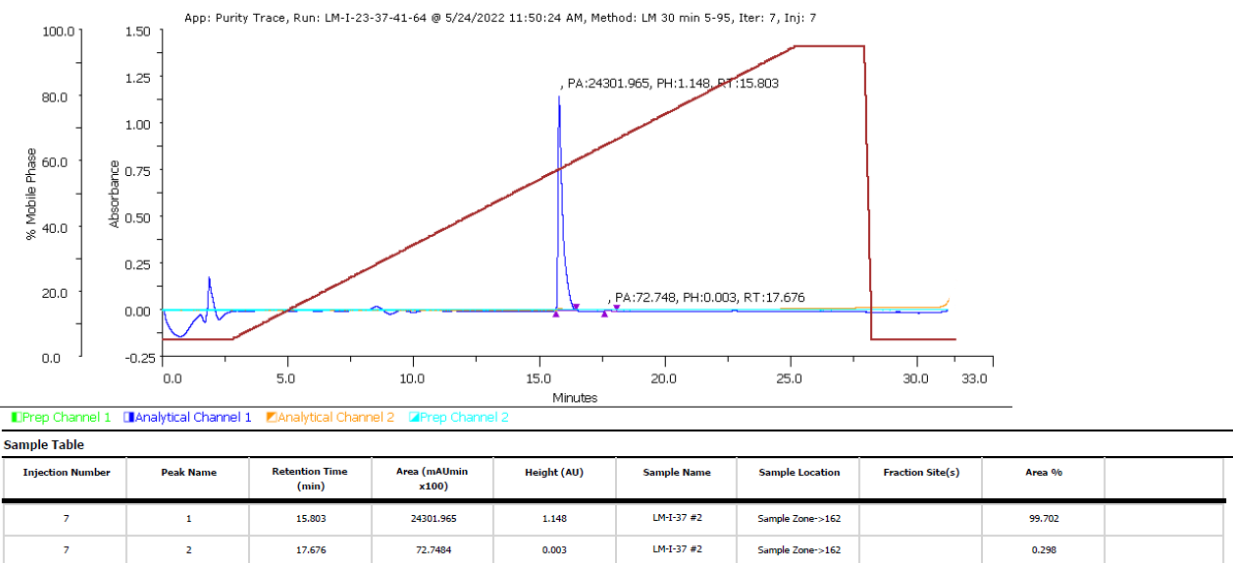

7m

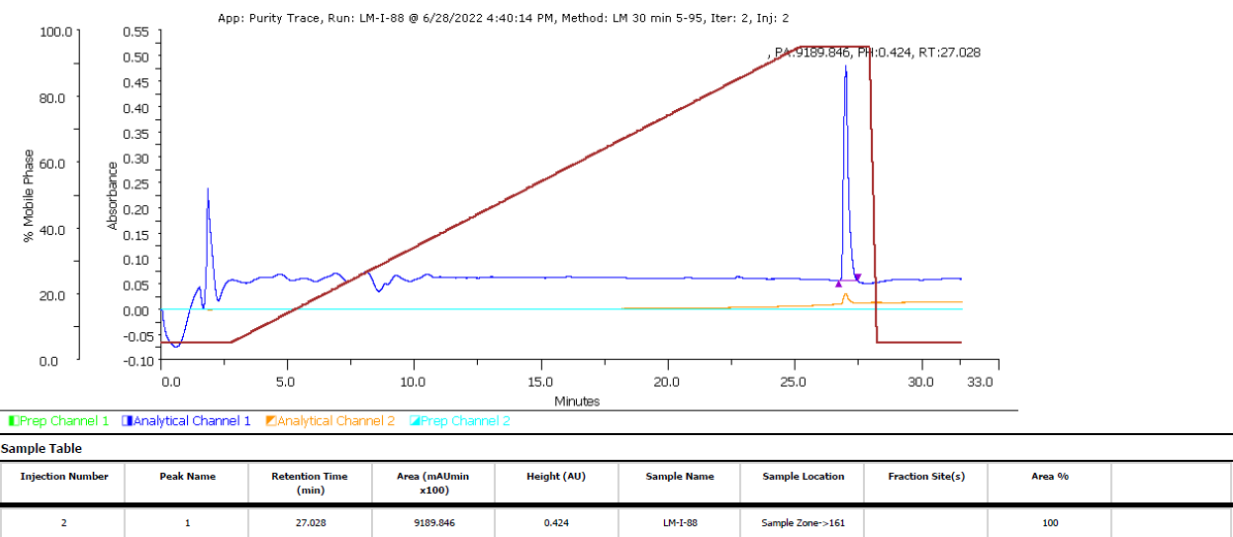

7n

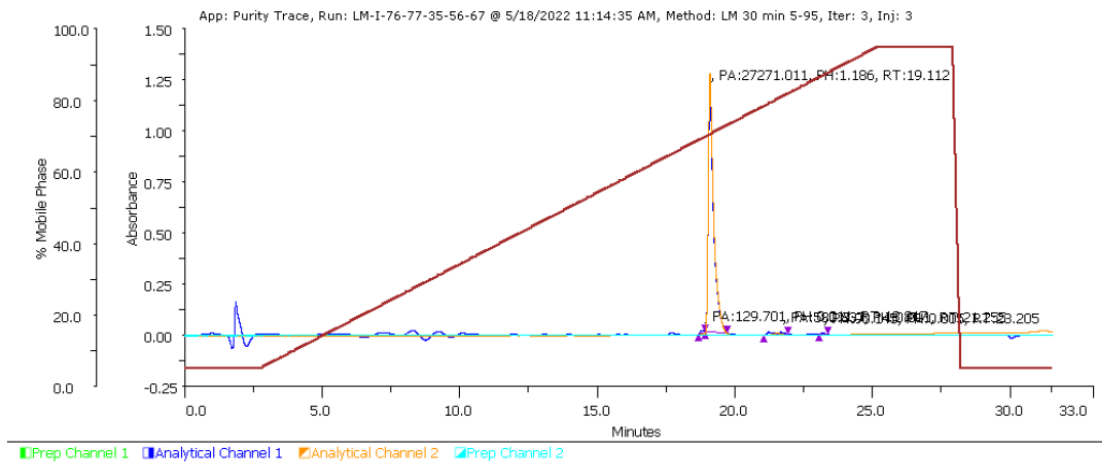

Sample Table

| Injection Number | Peak Name | Retention Time (min) | Area (mAUmin x100) | Height (AU) | Sample Name | Sample Location  | Fraction Site(s) | Area % |
|------------------|-----------|----------------------|--------------------|-------------|-------------|------------------|------------------|--------|
| 3                | 1         | 18.817               | 129.7009           | 0.011       | LM-I-76     | Sample Zone->161 |                  | 0.462  |
| 3                | 2         | 19.112               | 27271.0106         | 1.186       | LM-I-76     | Sample Zone->161 |                  | 97.148 |
| 3                | 3         | 21.255               | 580.8367           | 0.011       | LM-I-76     | Sample Zone->161 |                  | 2.069  |
| 3                | 4         | 23.205               | 90.1447            | 0.005       | LM-I-76     | Sample Zone->161 |                  | 0.321  |

7o

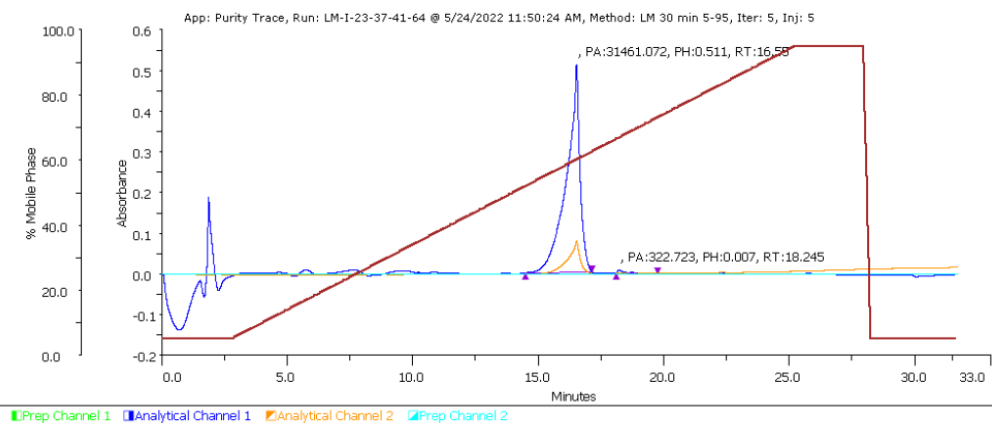

Sample Table

| Injection Number | Peak Name | Retention Time (min) | Area (mAUmin x100) | Height (AU) | Sample Name | Sample Location  | Fraction Site(s) | Area % |
|------------------|-----------|----------------------|--------------------|-------------|-------------|------------------|------------------|--------|
| 5                | 1         | 16.55                | 31461.072          | 0.511       | LM-I-41     | Sample Zone->163 |                  | 98.985 |
| 5                | 2         | 18.245               | 322.7227           | 0.007       | LM-I-41     | Sample Zone->163 |                  | 1.015  |

7p

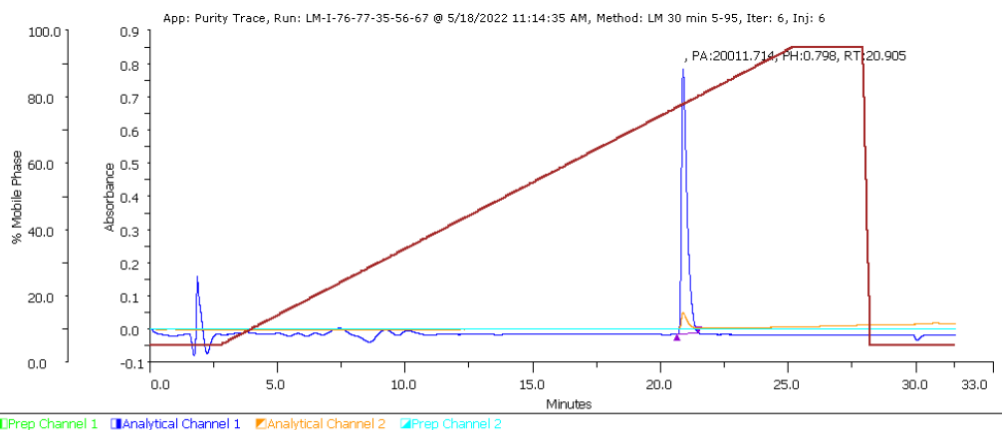

Sample Table

| Injection Number | Peak Name | Retention Time (min) | Area (mAUmin x100) | Height (AU) | Sample Name | Sample Location  | Fraction Site(s) | Area % |
|------------------|-----------|----------------------|--------------------|-------------|-------------|------------------|------------------|--------|
| 6                | 1         | 20.905               | 20011.7141         | 0.798       | LM-1-56     | Sample Zone->159 |                  | 100    |

7q

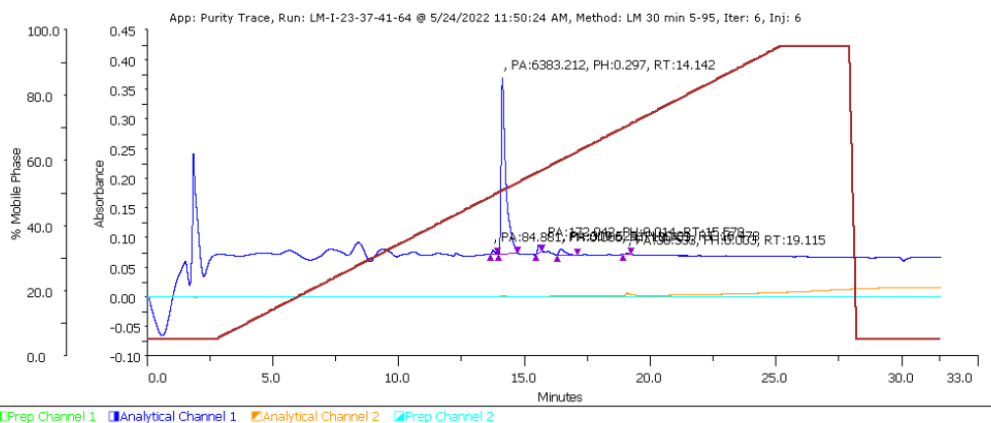

Sample Table

| Injection Number | Peak Name | Retention Time (min) | Area (mAUmin x100) | Height (AU) | Sample Name | Sample Location  | Fraction Site(s) | Area % |
|------------------|-----------|----------------------|--------------------|-------------|-------------|------------------|------------------|--------|
| 6                | 1         | 14.142               | 6383.212           | 0.297       | LM-1-64     | Sample Zone->159 |                  | 91.349 |
| 6                | 2         | 15.578               | 172.0418           | 0.014       | LM-1-64     | Sample Zone->159 |                  | 2.462  |
| 6                | 3         | 16.478               | 309.5251           | 0.01        | LM-1-64     | Sample Zone->159 |                  | 4.43   |
| 6                | 4         | 13.763               | 84.381             | 0.006       | LM-1-64     | Sample Zone->159 |                  | 1.208  |
| 6                | 5         | 19.115               | 38.5334            | 0.003       | LM-1-64     | Sample Zone->159 |                  | 0.551  |

### **Synthesis of N-2-[4-[[1-Adamantanecarbonyl]-1-piperazinyl]-2-oxoethyl]-2-methylpropenamide (7r):**

Methacrylic acid (0.031 mL, 0.361 mmol, 1.1 eq), HBTU (0.2 g, 0.524 mmol, 1.6 eq), Hünig's base (0.17 mL, 0.98 mmol, 3.0 eq), and **6** (0.1 g, 0.327 mmol, 1.0 eq) were stirred in anhydrous DCM (5 mL) at R.T. for 16 h, at which point the reaction was confirmed complete by TLC analysis. The reaction was concentrated *in vacuo* and the residue was redissolved in EtOAc (50 mL). The organic phase was washed with 5% AcOH (3 × 15 mL), brine (25 mL), NaHCO<sub>3</sub> (25 mL), and brine again (25 mL). The organic phase was dried over MgSO<sub>4</sub> and concentrated *in vacuo* to give a light orange solid, which was purified by silica gel column chromatography (5% MeOH/EtOAc, dry load using celite, R<sub>f</sub> = 0.41) and then washing with pentane to give a white solid (0.028 g, 23%). <sup>1</sup>H NMR (300 MHz, CDCl<sub>3</sub>) δ 5.78-5.77 (m, 1H), 5.37-5.36 (m, 1H), 4.07 (s, 2H), 3.71-3.61 (m, 4H), 3.60-3.57 (m, 2H), 3.44-3.40 (m, 2H), 2.02-2.00 (m, 3H), 1.96-1.93 (m, 9H), 1.74-1.64 (m, 6H). <sup>13</sup>C NMR (75 MHz, CDCl<sub>3</sub>) δ 176.2, 168.2, 167.0, 139.2, 120.6, 45.3, 44.9, 44.7, 42.3, 41.9, 41.5, 39.2, 36.6, 28.5, 18.6. HRMS (ESI) calc'd for C<sub>21</sub>H<sub>31</sub>N<sub>3</sub>O<sub>3</sub>Na [MNa]<sup>+</sup>: 396.2263, found: 396.2243.

### **Crystal structure of 2-cyano-3-cyclopropylacrylic acid (I3):**

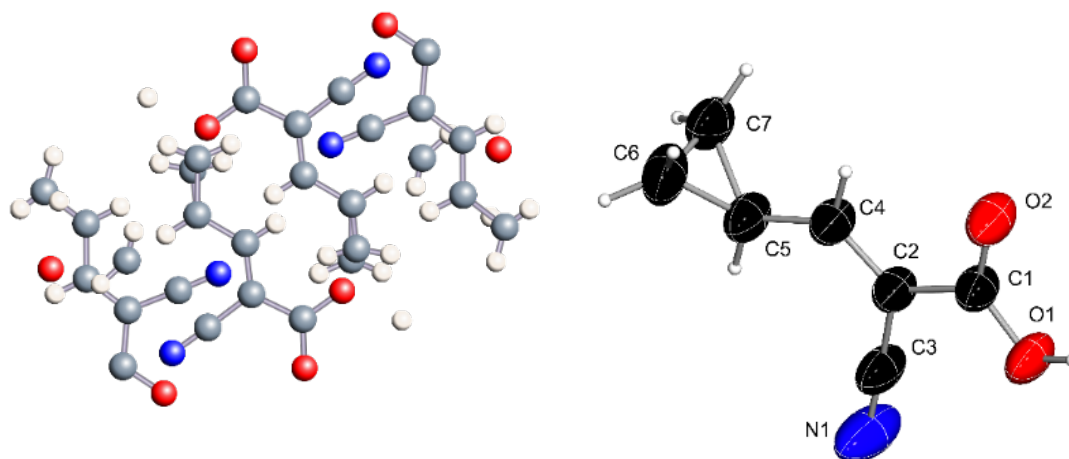

## NMR Spectra of Final Inhibitors and New Synthetic Intermediates:

### $^1\text{H}$ NMR (300 MHz, $\text{CDCl}_3$ ) Spectra of Compound 7a

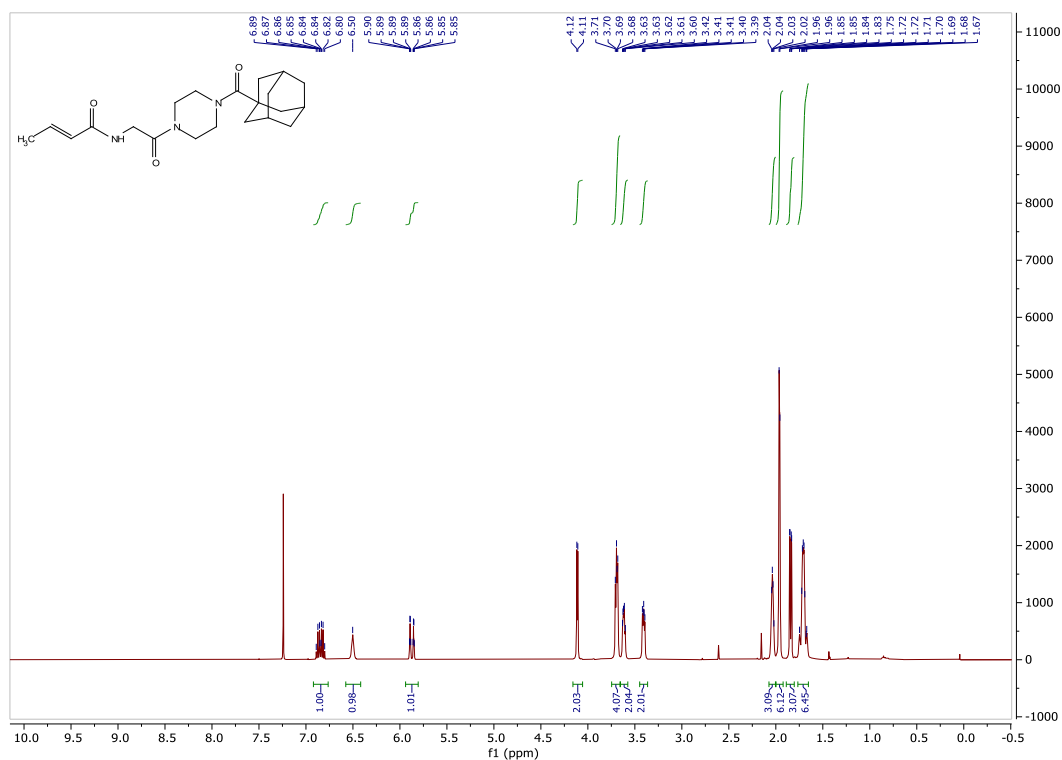

### $^{13}\text{C}$ NMR (75 MHz, $\text{CDCl}_3$ ) Spectra of Compound 7a

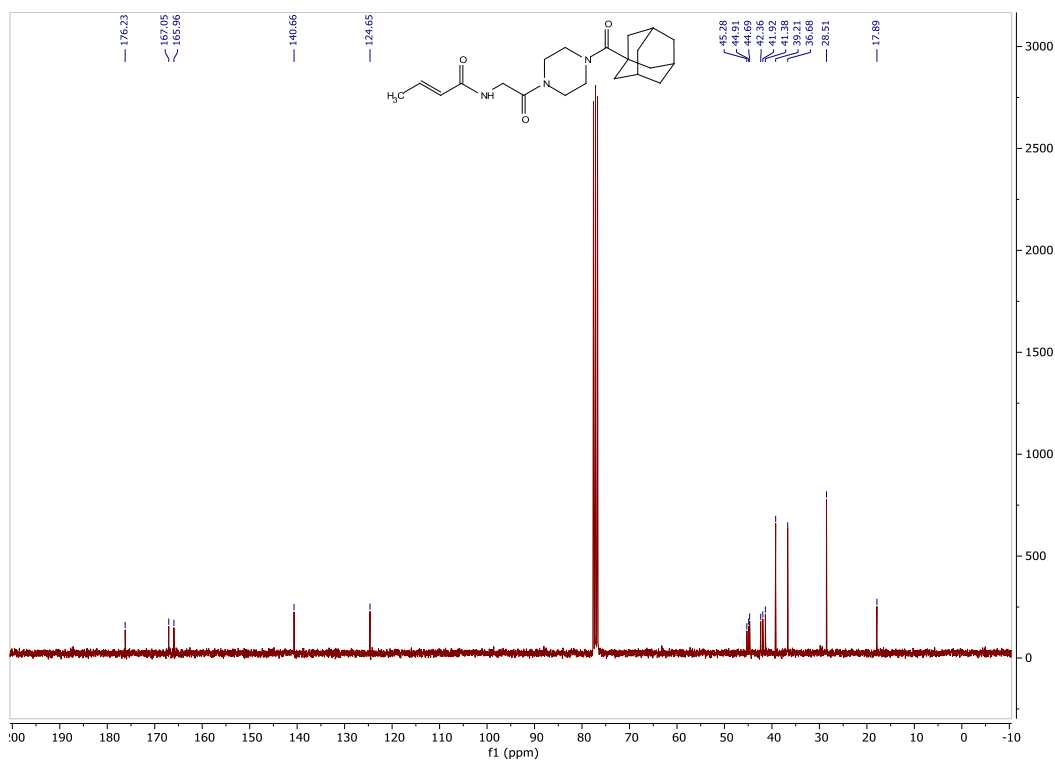

### <sup>1</sup>H NMR (300 MHz, CDCl<sub>3</sub>) Spectra of Compound **7b**

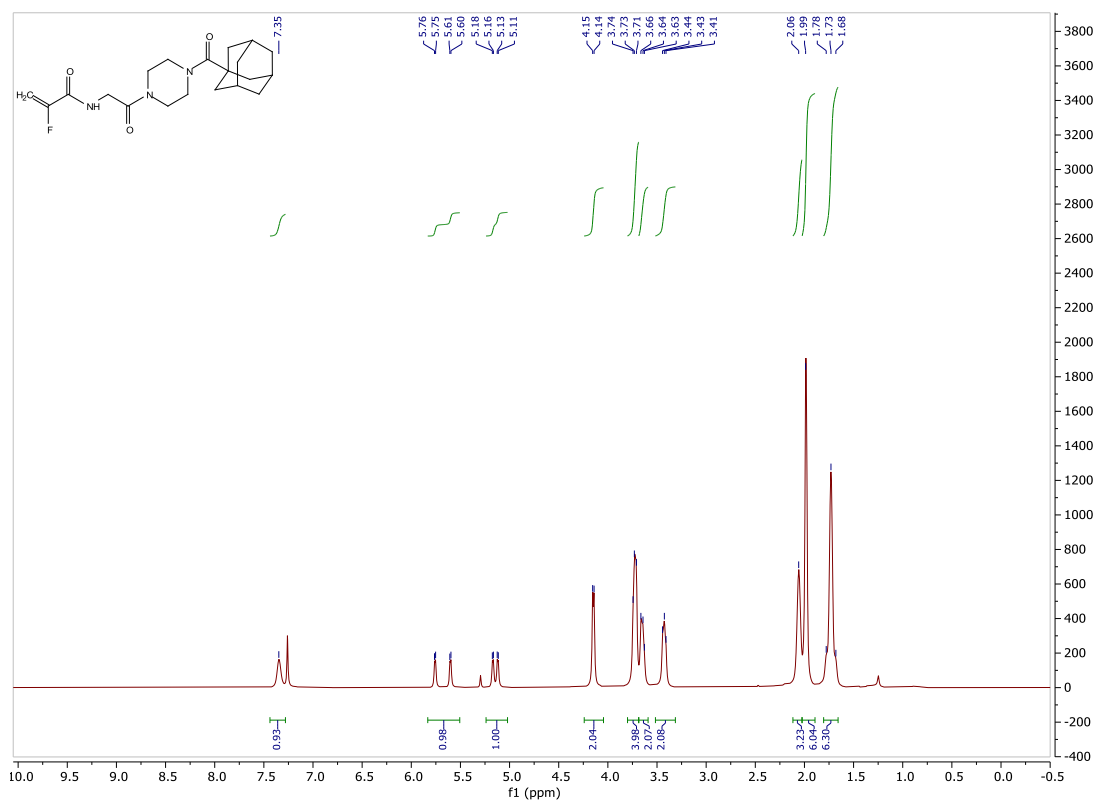

### <sup>13</sup>C NMR (75 MHz, CDCl<sub>3</sub>) Spectra of Compound **7b**

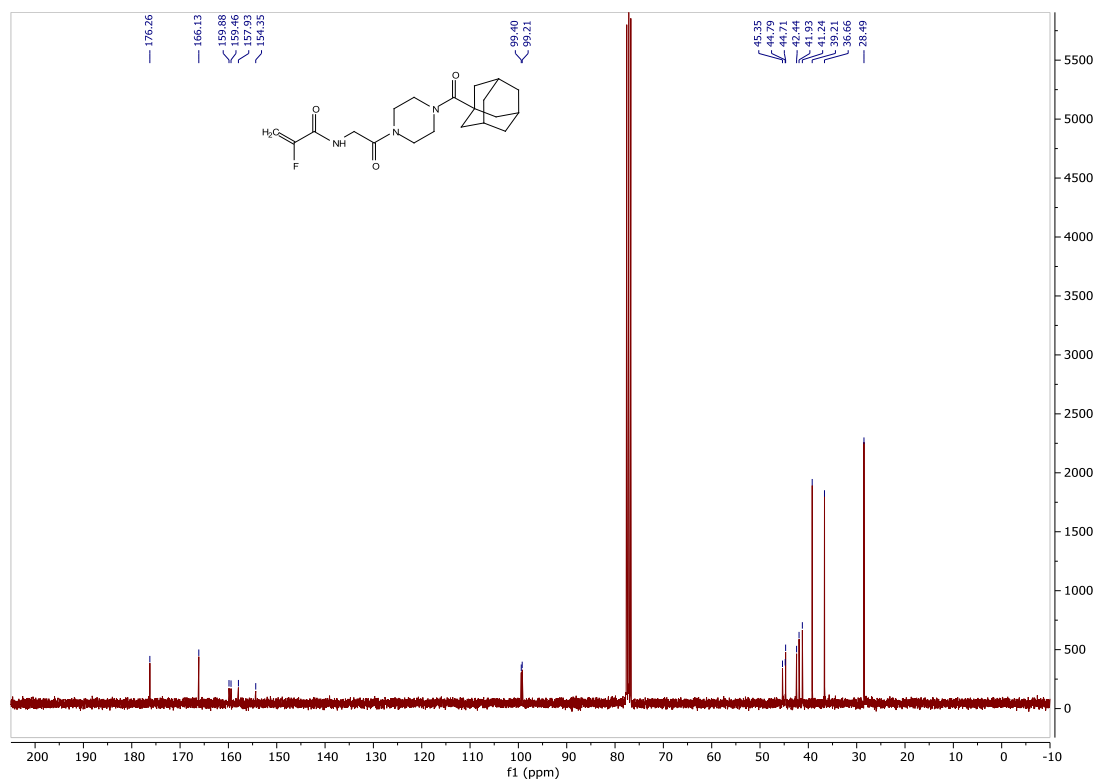



$^{19}\text{F}$  NMR (283 MHz,  $\text{CDCl}_3$ ) Spectra of Compound **7b**

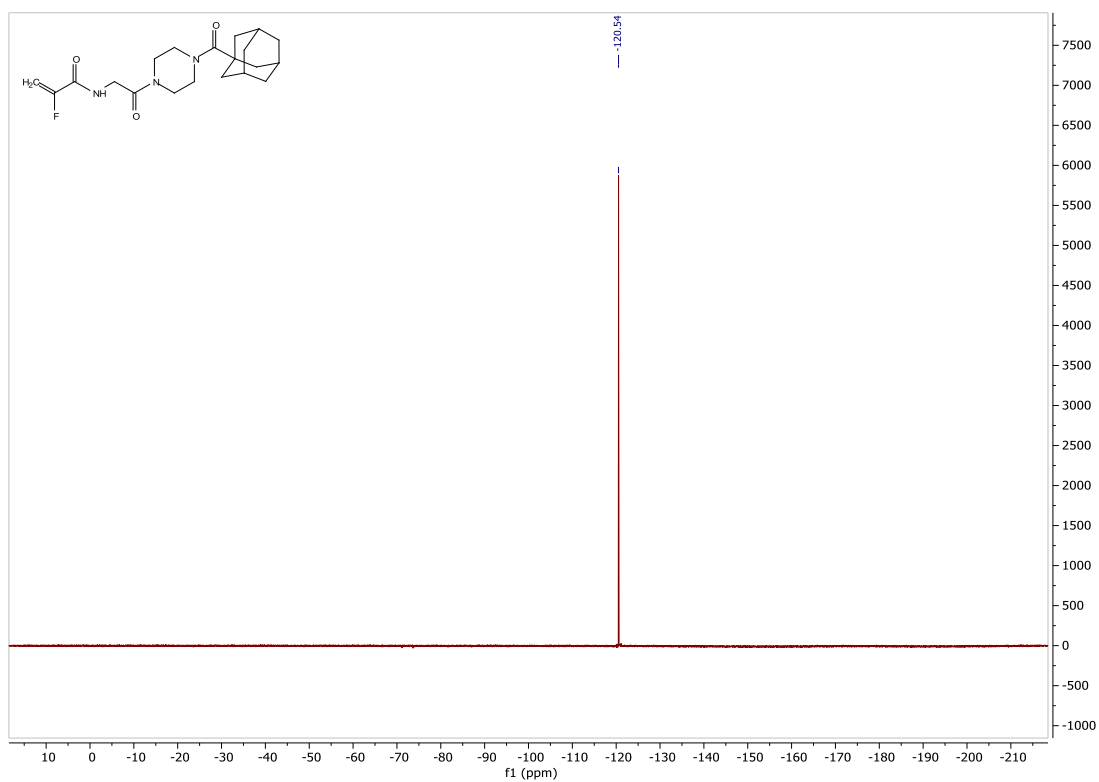

$^1\text{H}$  NMR (300 MHz,  $\text{CDCl}_3$ ) Spectra of Compound **7c**

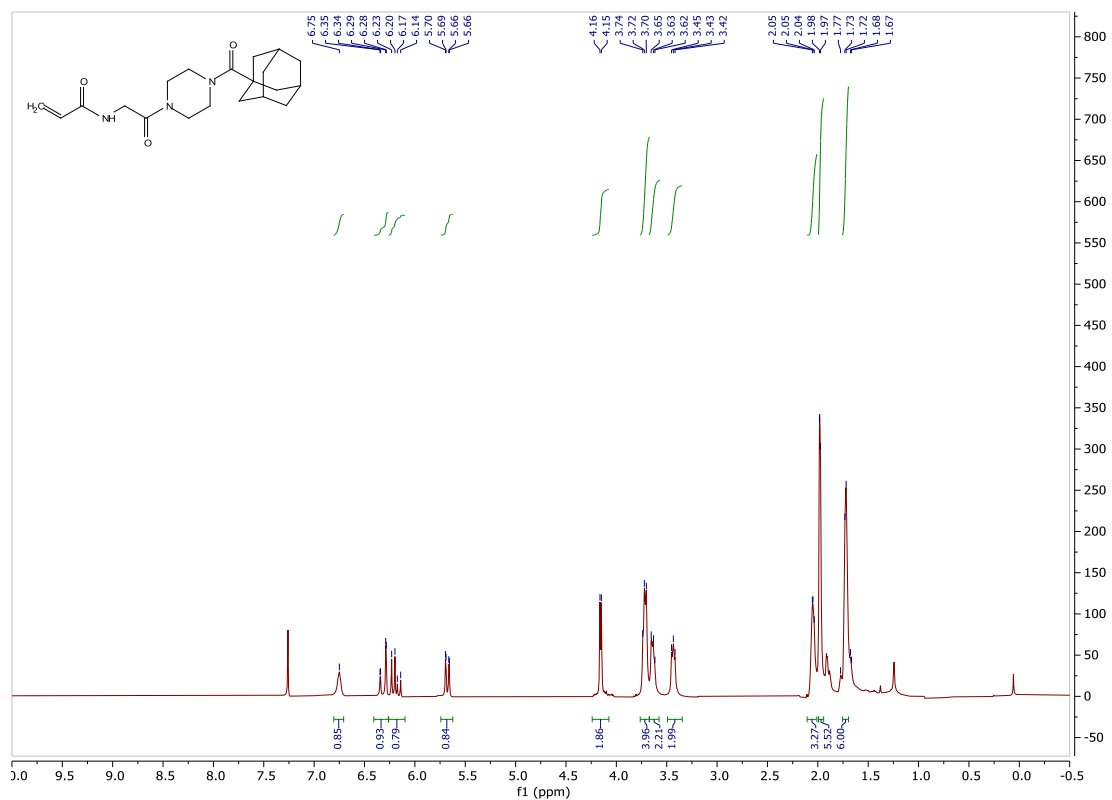

$^{13}\text{C}$  NMR (75 MHz,  $\text{CDCl}_3$ ) Spectra of Compound **7c**

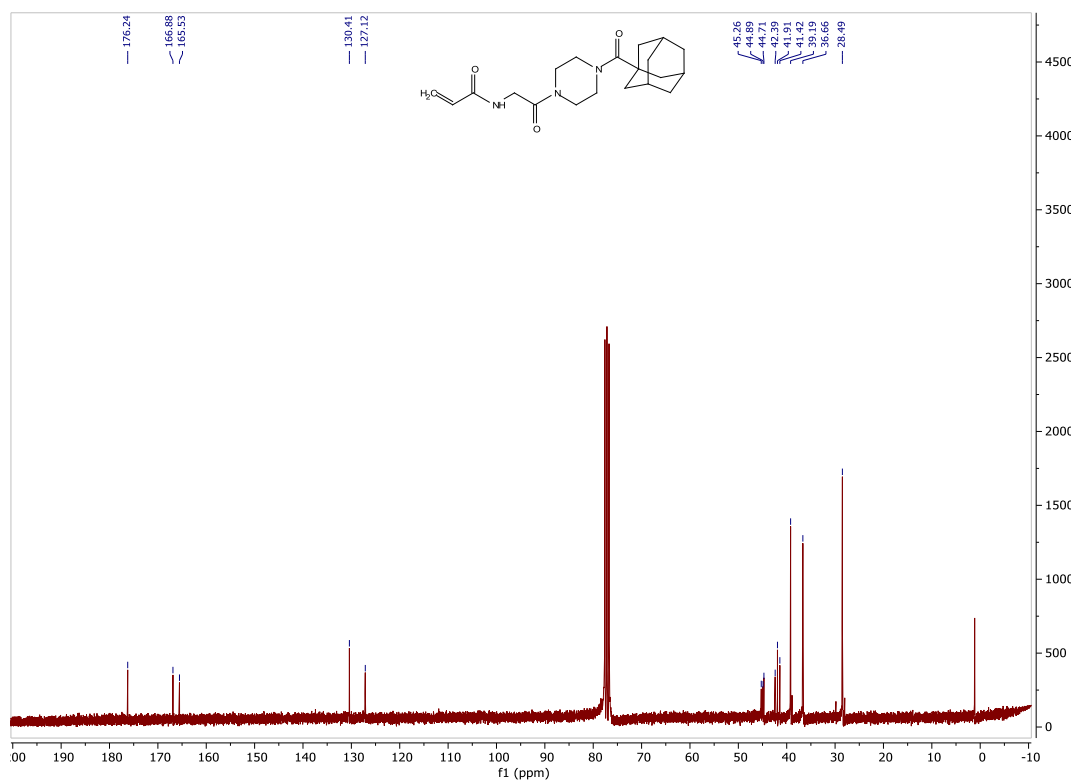

$^1\text{H}$  NMR (300 MHz,  $\text{CDCl}_3$ ) Spectra of Compound **7d**

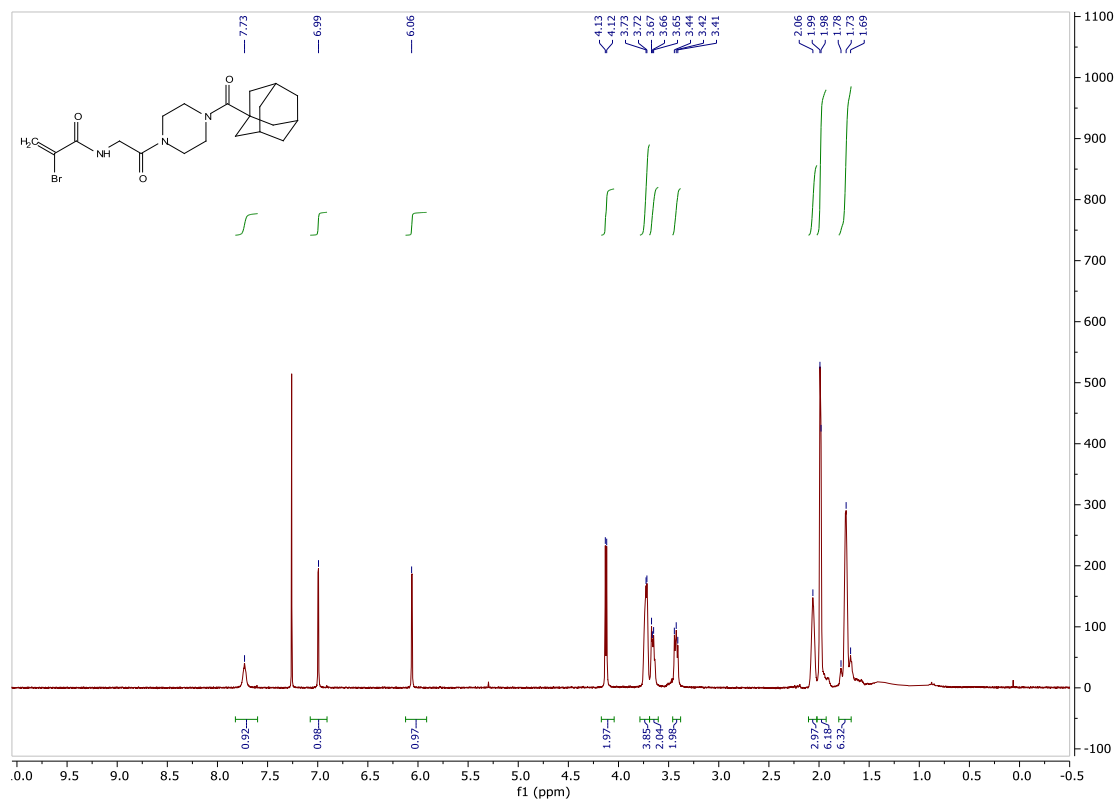

### <sup>13</sup>C NMR (75 MHz, CDCl<sub>3</sub>) Spectra of Compound 7d

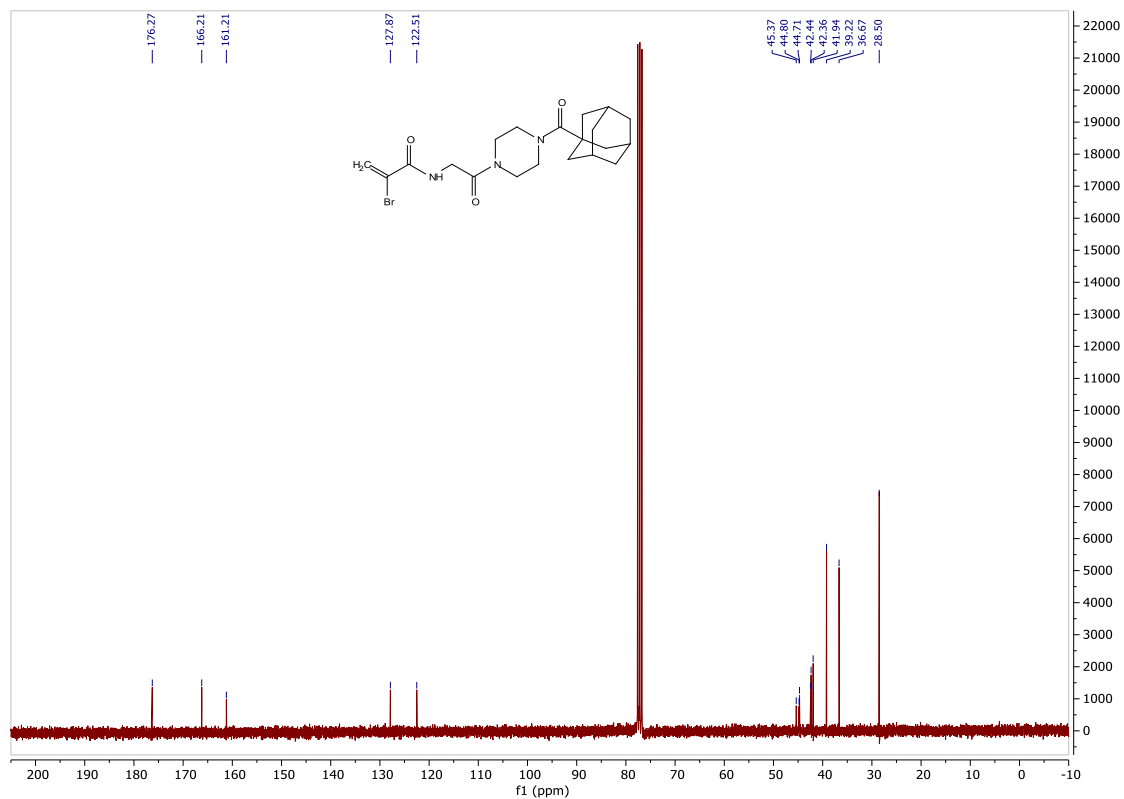

### <sup>1</sup>H NMR (300 MHz, CDCl<sub>3</sub>) Spectra of Compound 7e

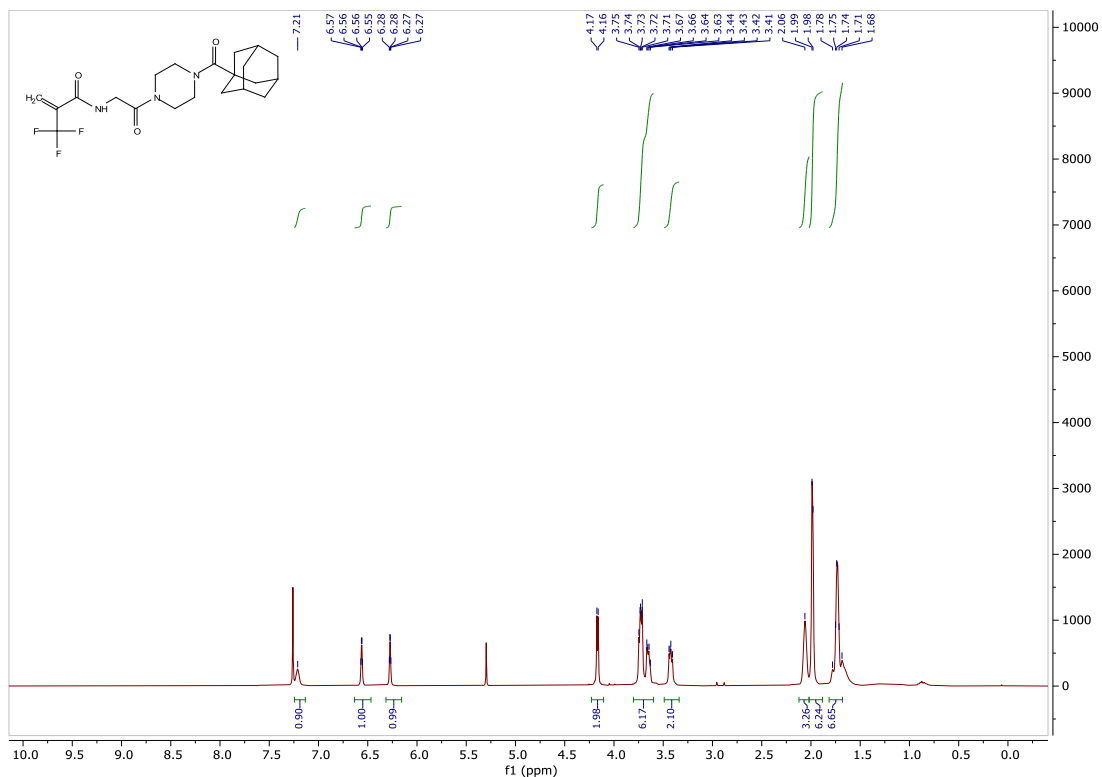

### <sup>13</sup>C NMR (75 MHz, CD<sub>3</sub>OD) Spectra of Compound 7e

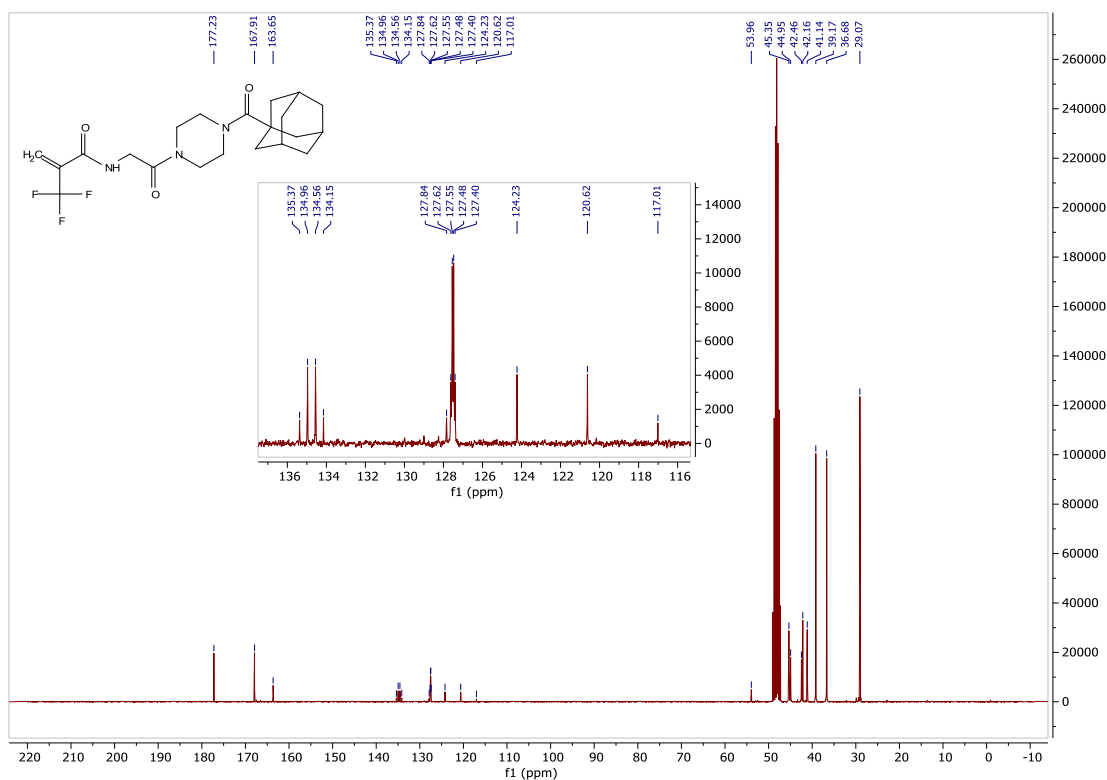

### <sup>19</sup>F NMR (283 MHz, CDCl<sub>3</sub>) Spectra of Compound 7e

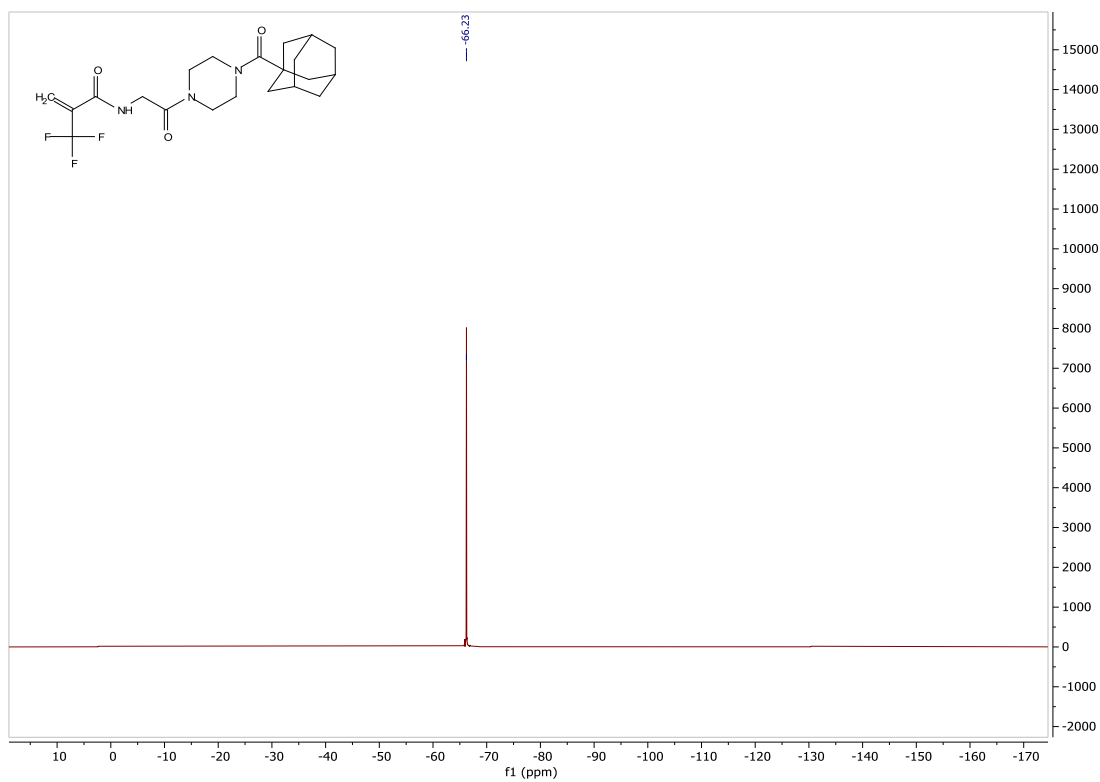

### $^1\text{H}$ NMR (300 MHz, $\text{CDCl}_3$ ) Spectra of Compound **7f**

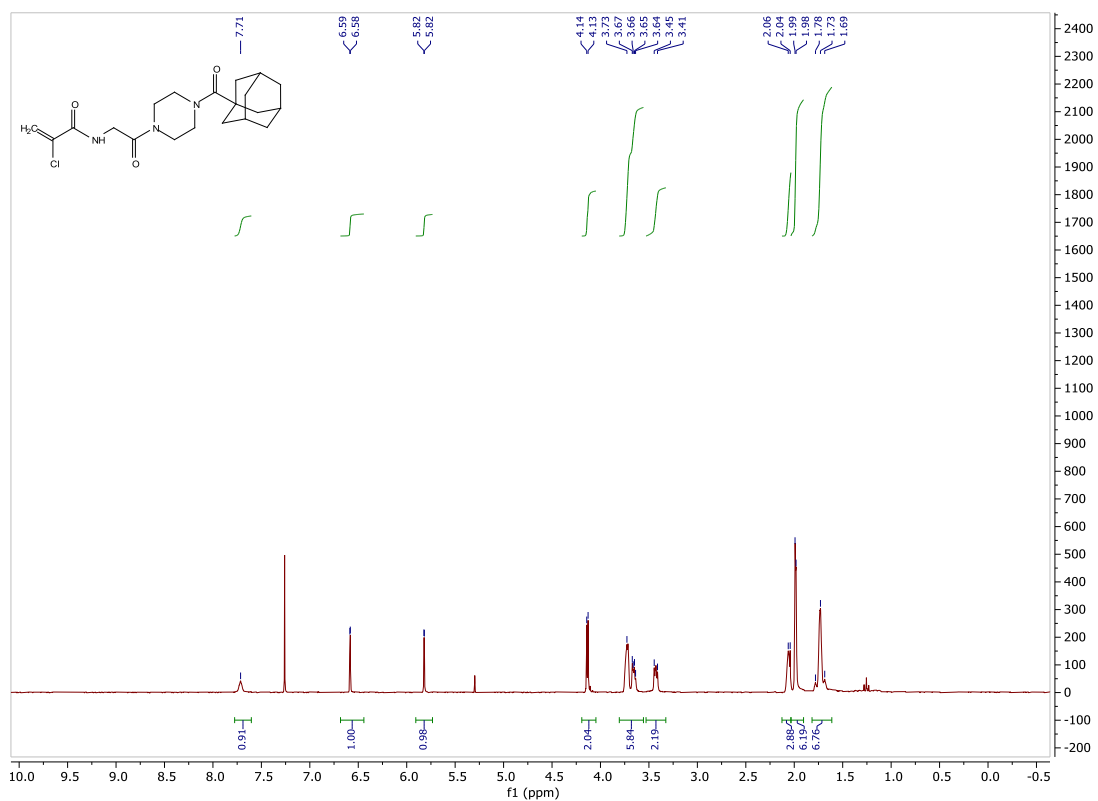

### $^{13}\text{C}$ NMR (75 MHz, $\text{CDCl}_3$ ) Spectra of Compound **7f**

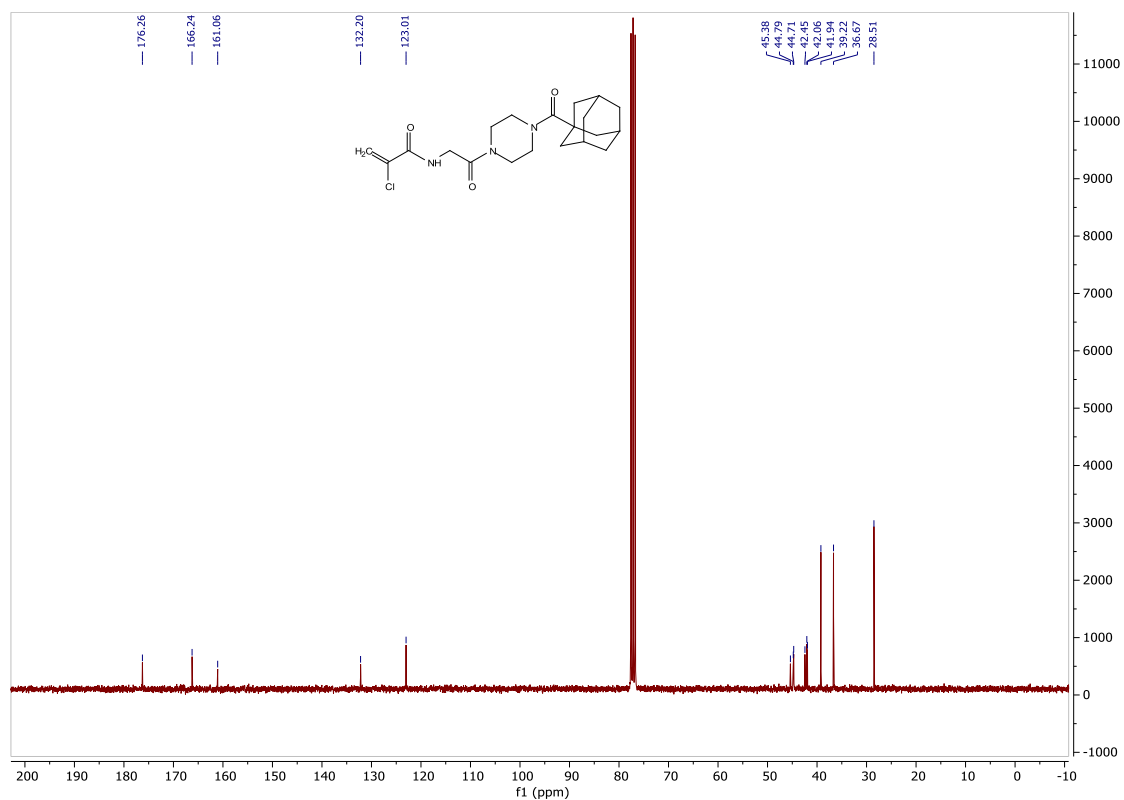

### $^1\text{H}$ NMR (300 MHz, $\text{CDCl}_3$ ) Spectra of Compound **7g**

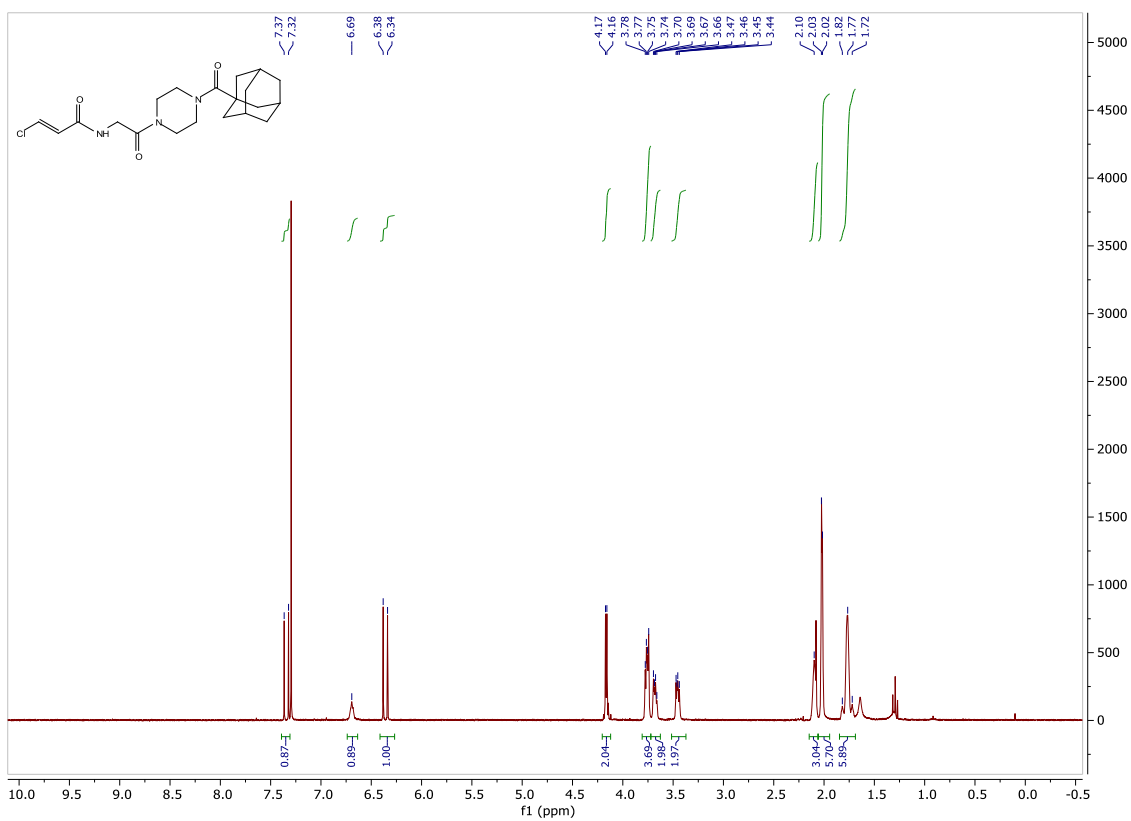

### $^{13}\text{C}$ NMR (75 MHz, $\text{CDCl}_3$ ) Spectra of Compound **7g**

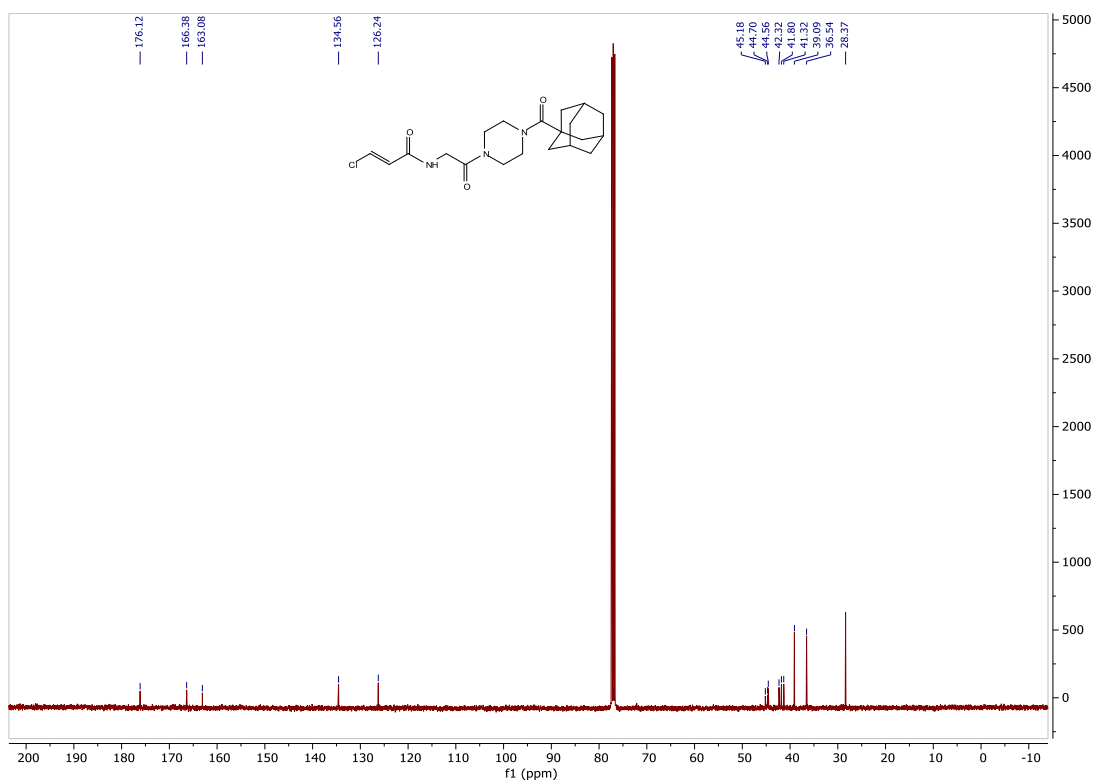

### <sup>1</sup>H NMR (300 MHz, CDCl<sub>3</sub>) Spectra of Compound 7h

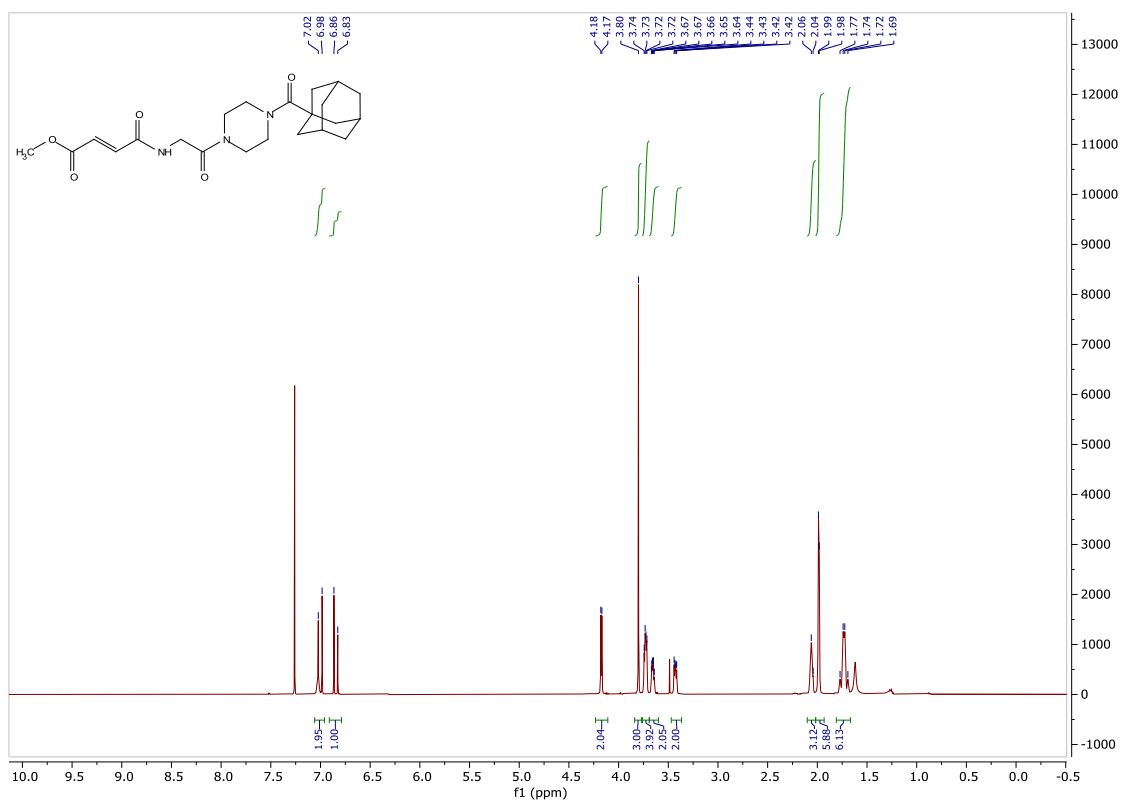

### <sup>13</sup>C NMR (75 MHz, CDCl<sub>3</sub>) Spectra of Compound 7h

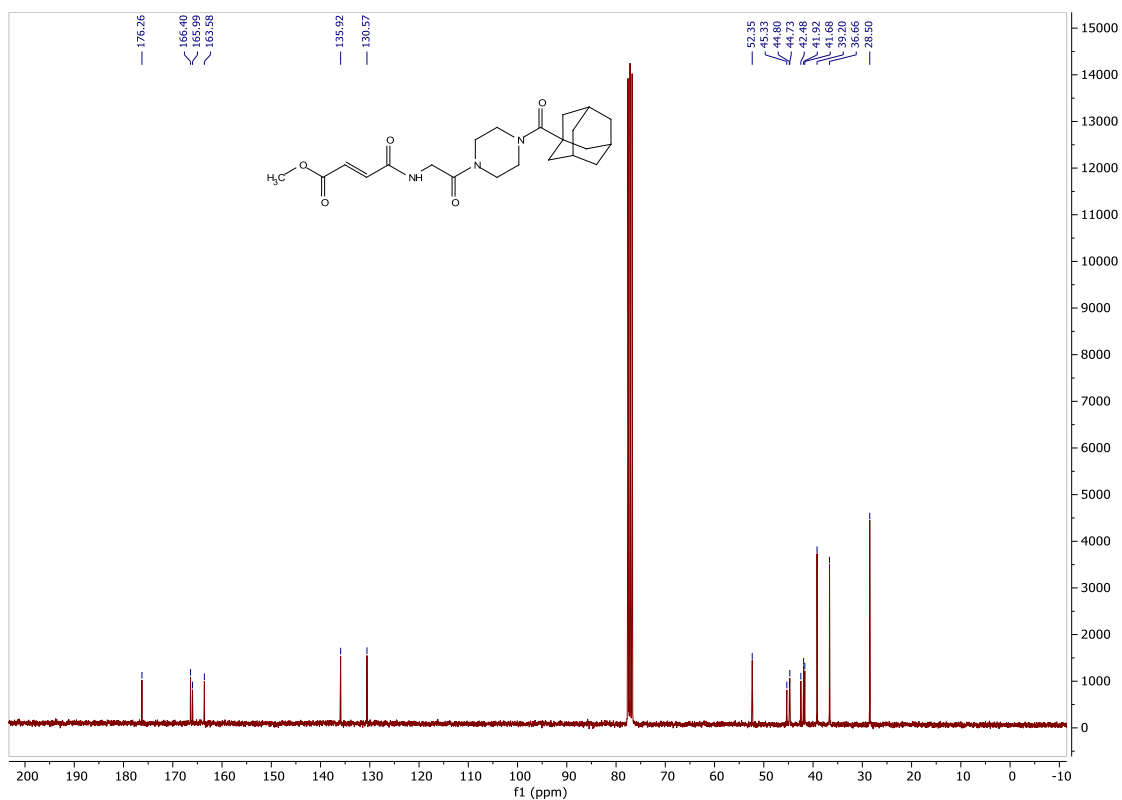

# <sup>1</sup>H NMR (300 MHz, CDCl<sub>3</sub>) Spectra of Compound **7i**

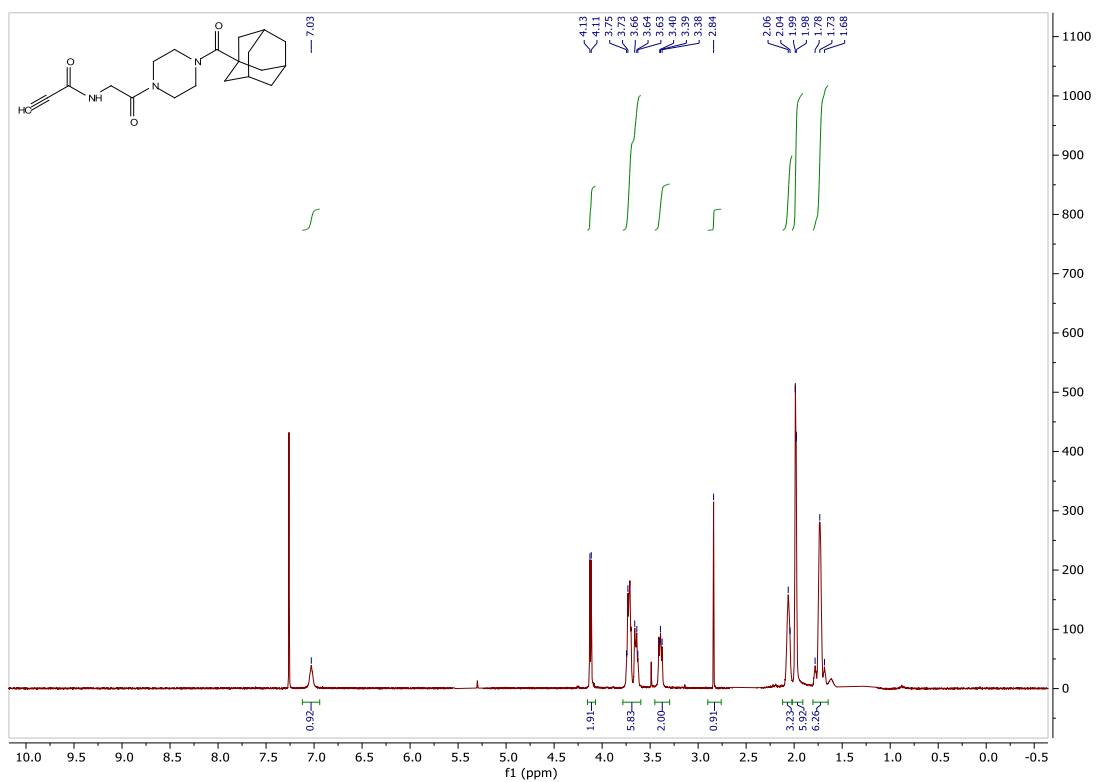

# <sup>13</sup>C NMR (75 MHz, CDCl<sub>3</sub>) Spectra of Compound **7i**

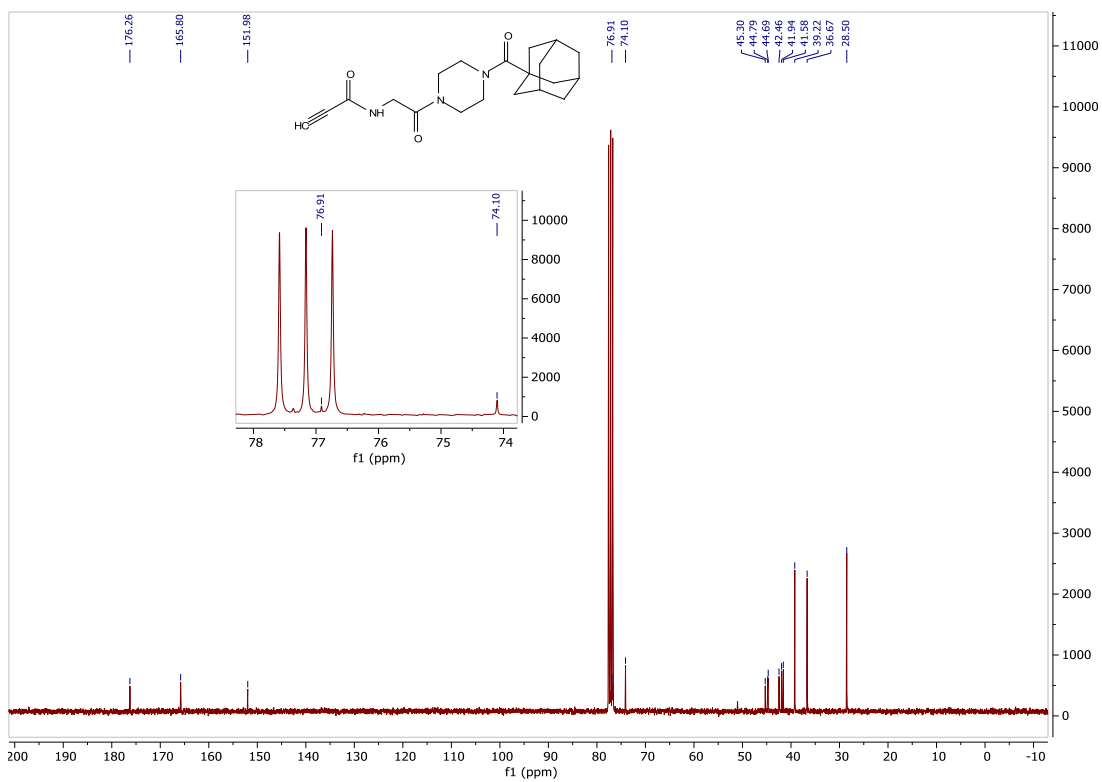



### <sup>1</sup>H NMR (300 MHz, CDCl<sub>3</sub>) Spectra of Compound 7j

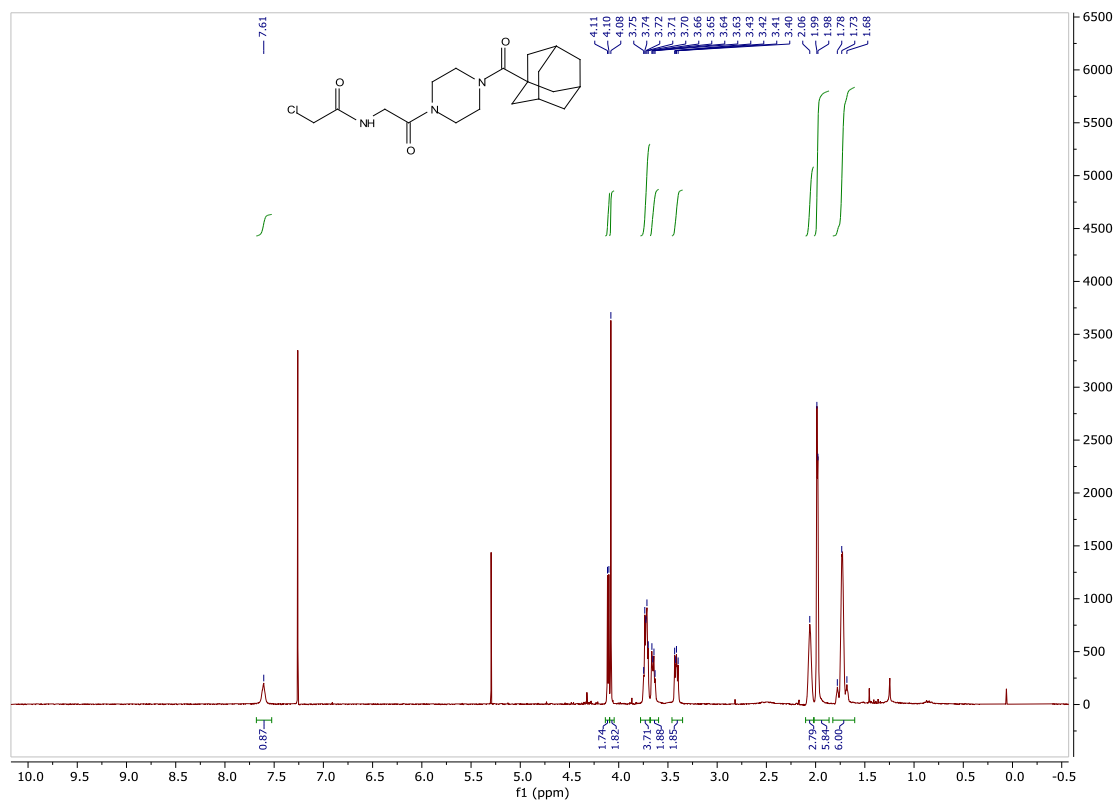

### <sup>13</sup>C NMR (75 MHz, CDCl<sub>3</sub>) Spectra of Compound 7j

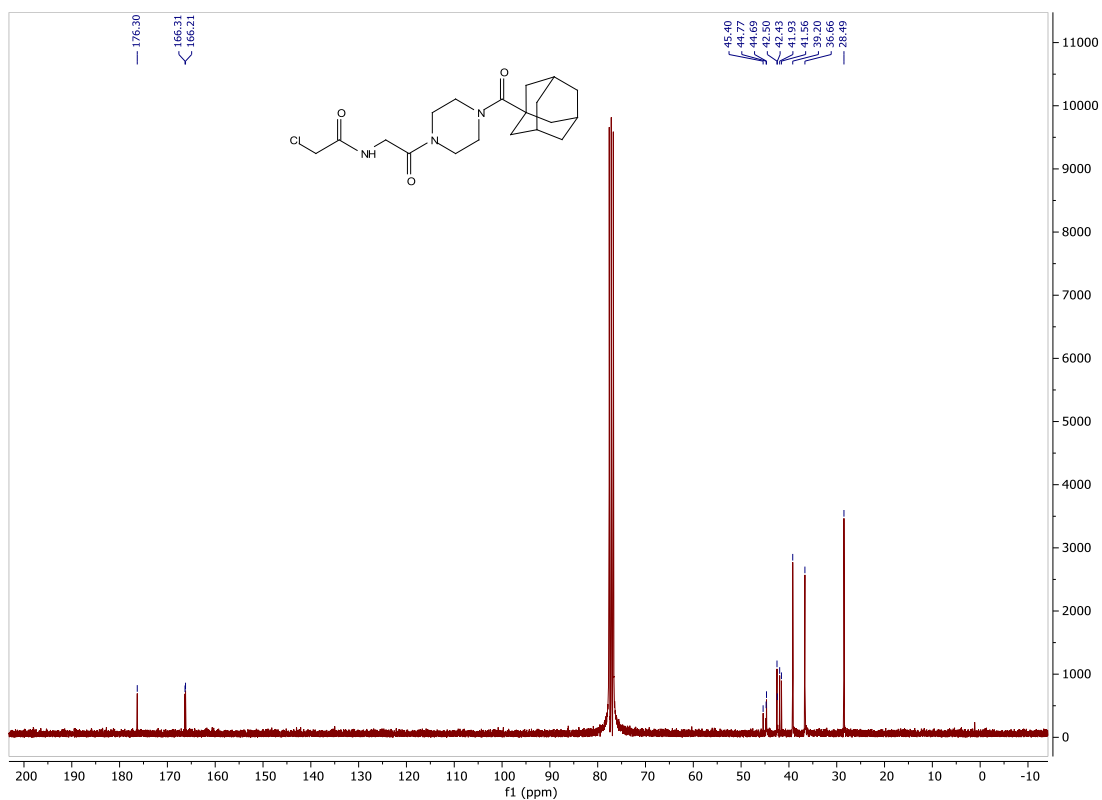

### <sup>1</sup>H NMR (300 MHz, CDCl<sub>3</sub>) Spectra of Compound 7k

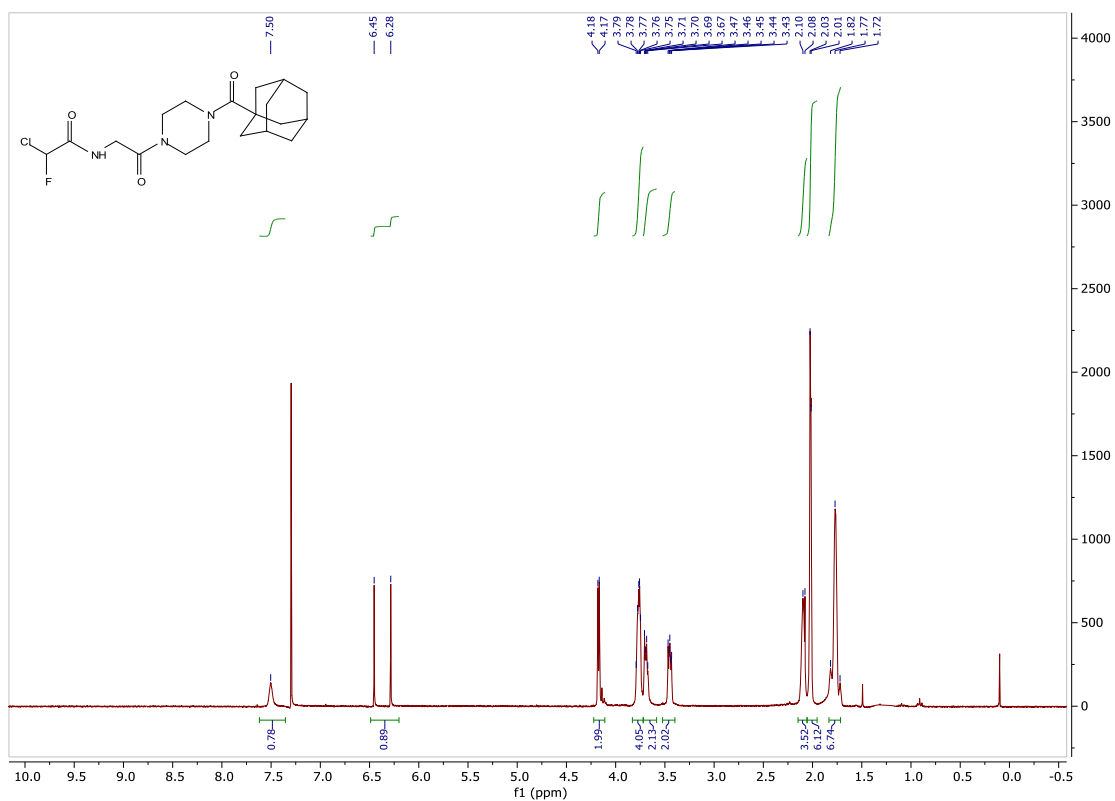

### <sup>13</sup>C NMR (75 MHz, CDCl<sub>3</sub>) Spectra of Compound 7k

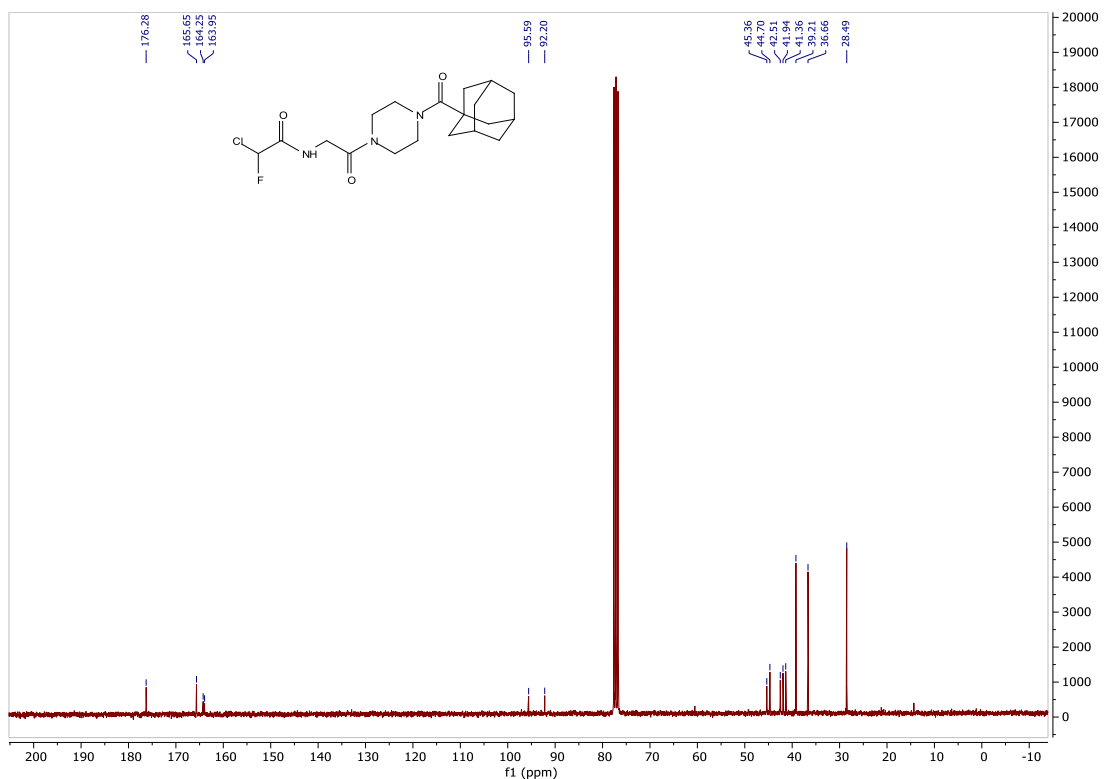

$^{19}\text{F}$  NMR (283 MHz,  $\text{CDCl}_3$ ) Spectra of Compound **7k**

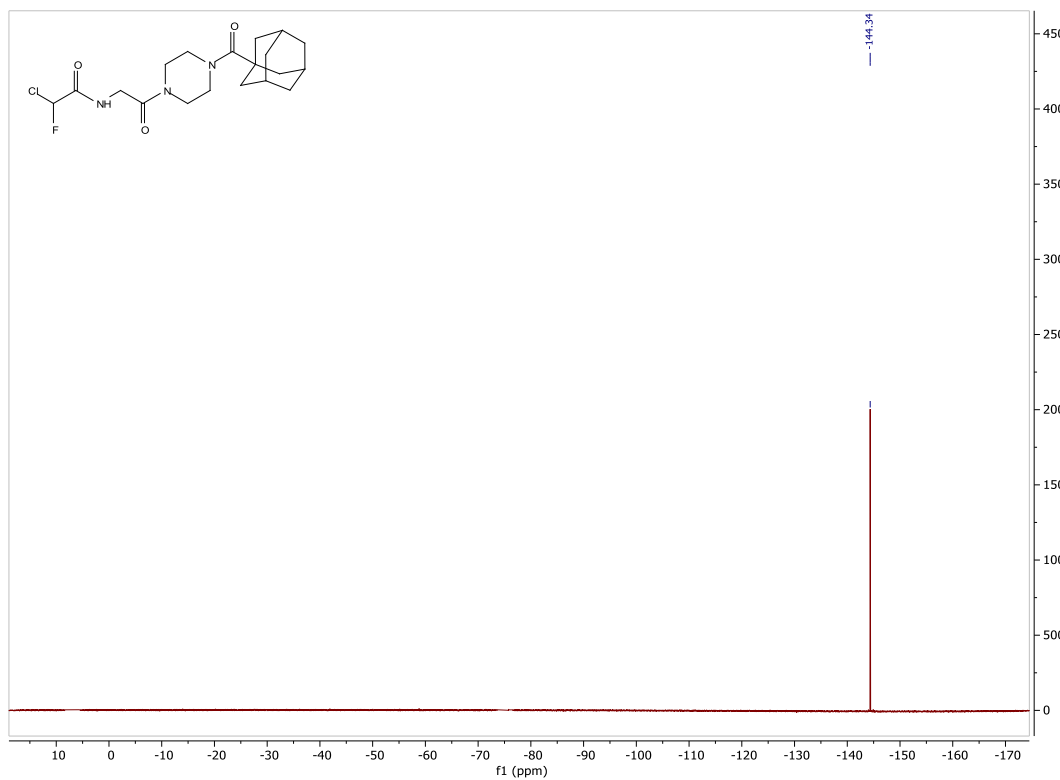

$^1\text{H}$  NMR (300 MHz,  $\text{CDCl}_3$ ) Spectra of Compound **7l**

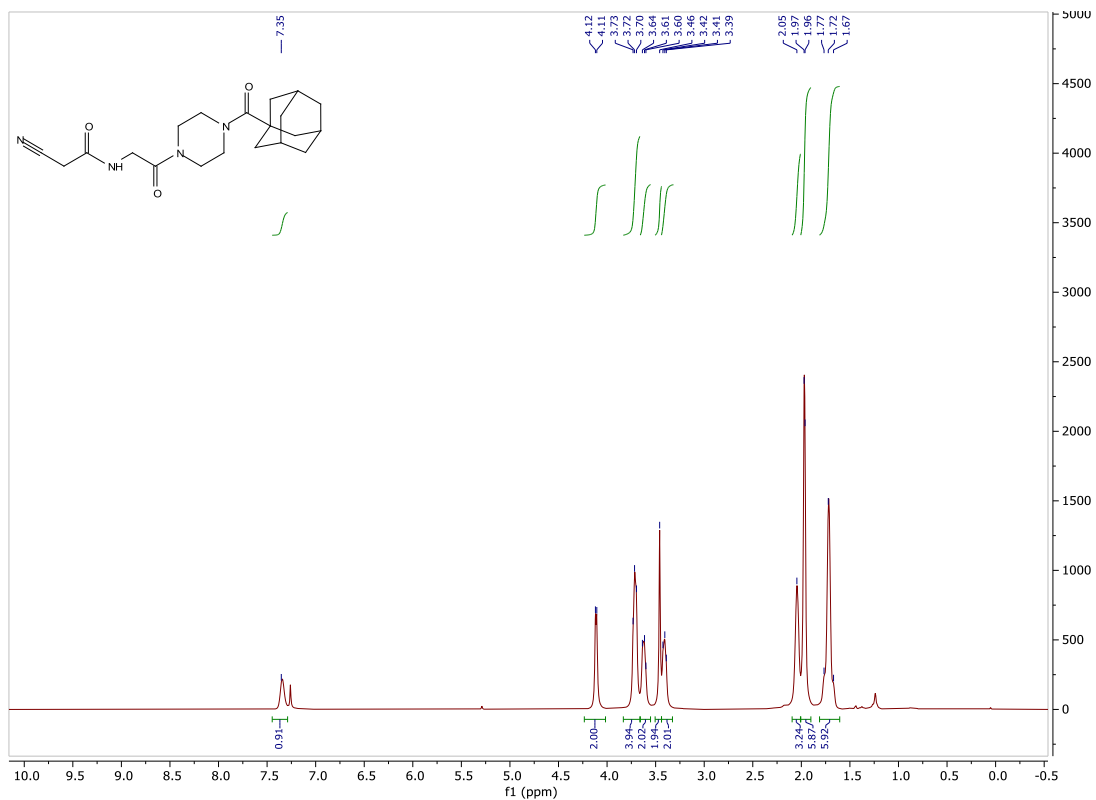

### $^{13}\text{C}$ NMR (75 MHz, $\text{CDCl}_3$ ) Spectra of Compound **7l**

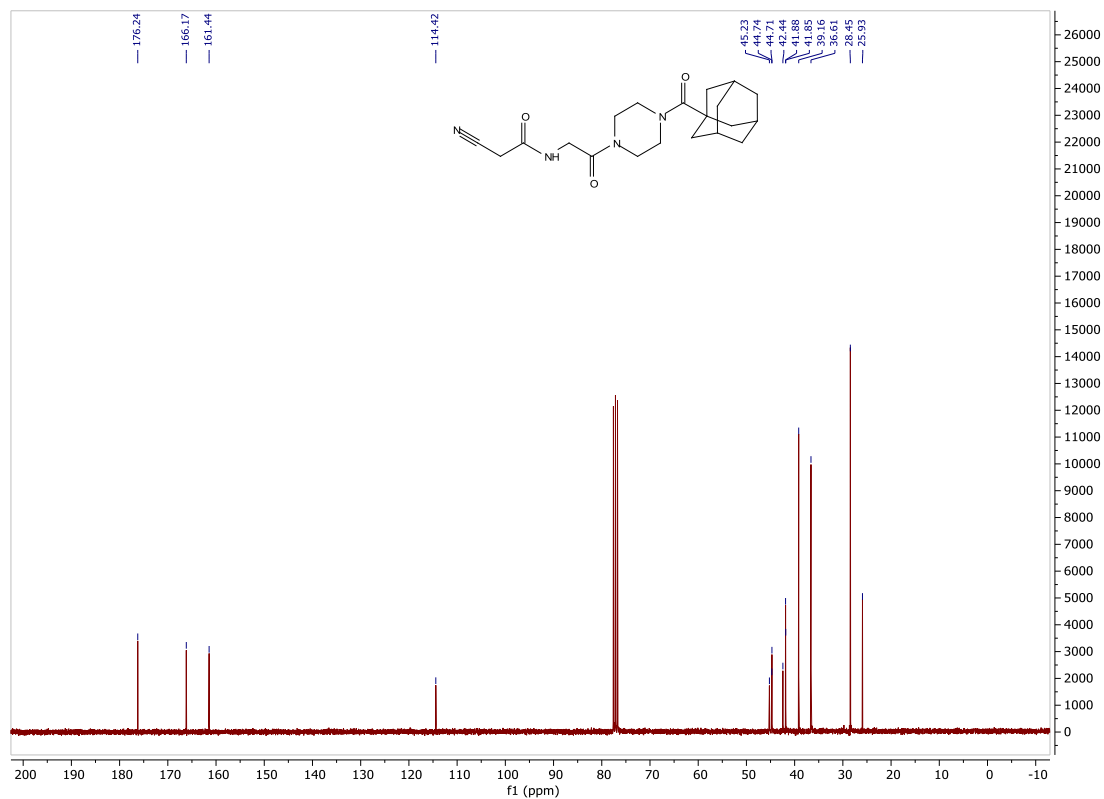

### $^1\text{H}$ NMR (300 MHz, $\text{CDCl}_3$ ) Spectra of Compound **7m**

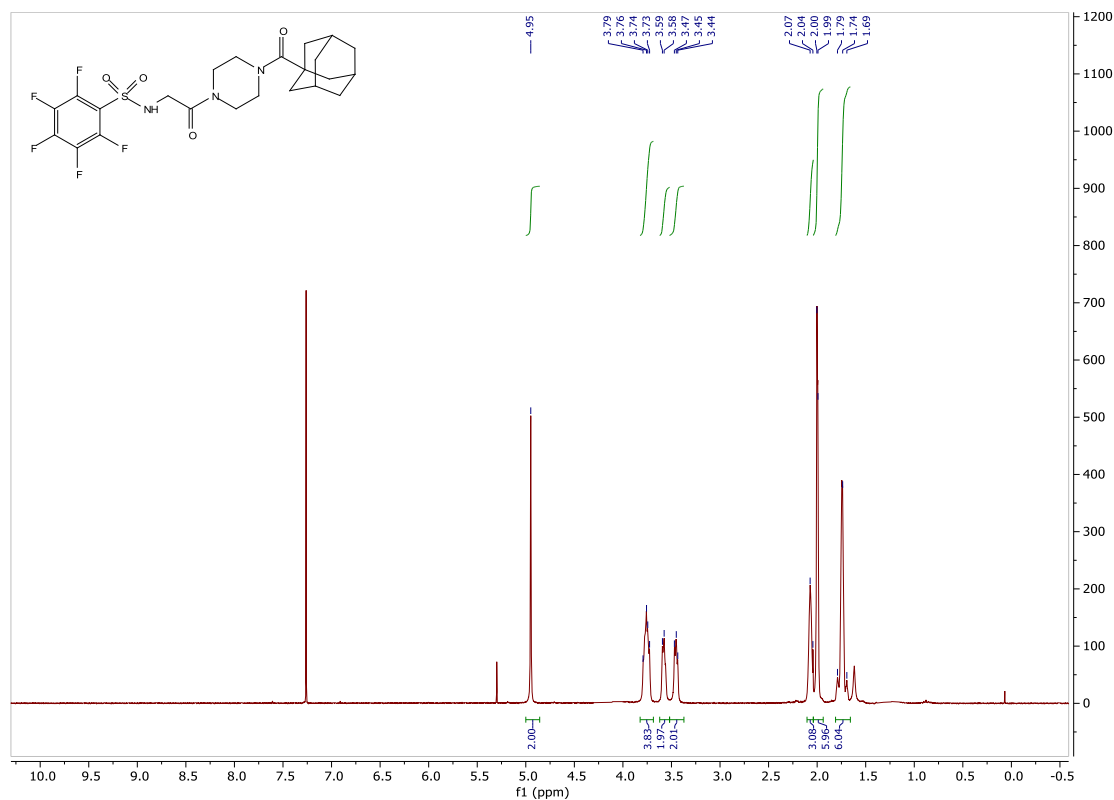

### <sup>13</sup>C NMR (75 MHz, CDCl<sub>3</sub>) Spectra of Compound 7m

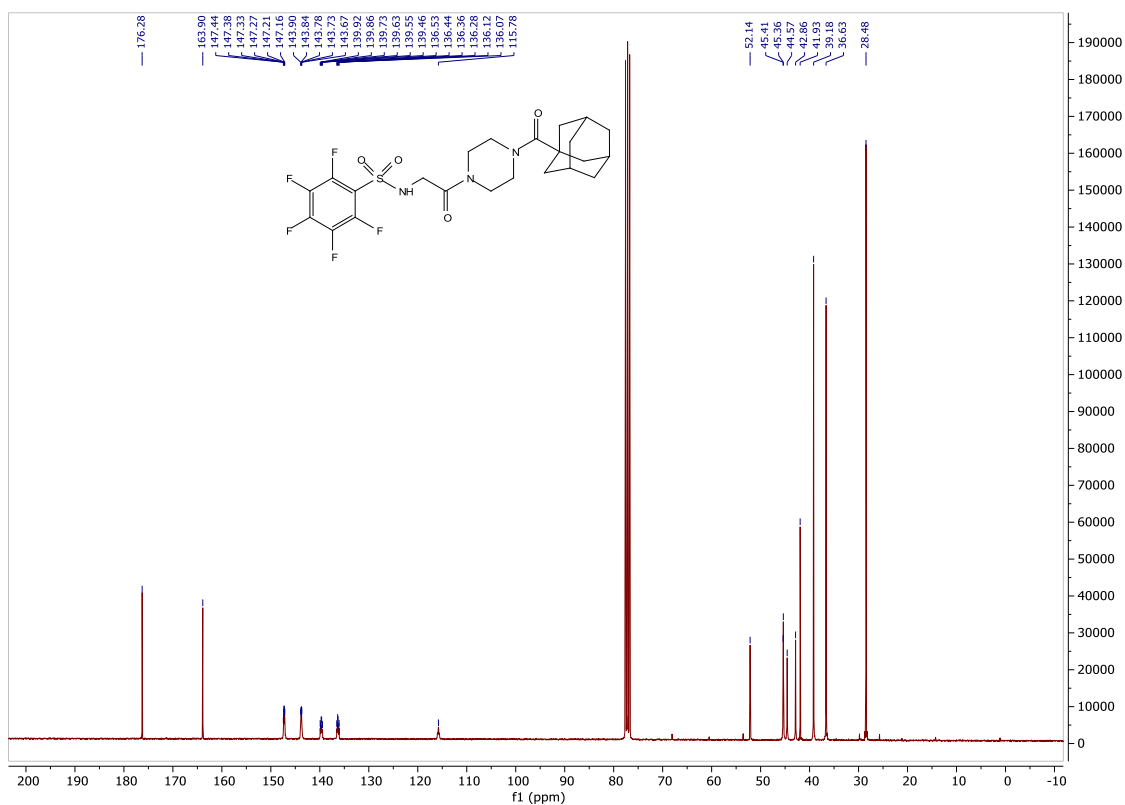

### <sup>19</sup>F NMR (283 MHz, CDCl<sub>3</sub>) Spectra of Compound 7m

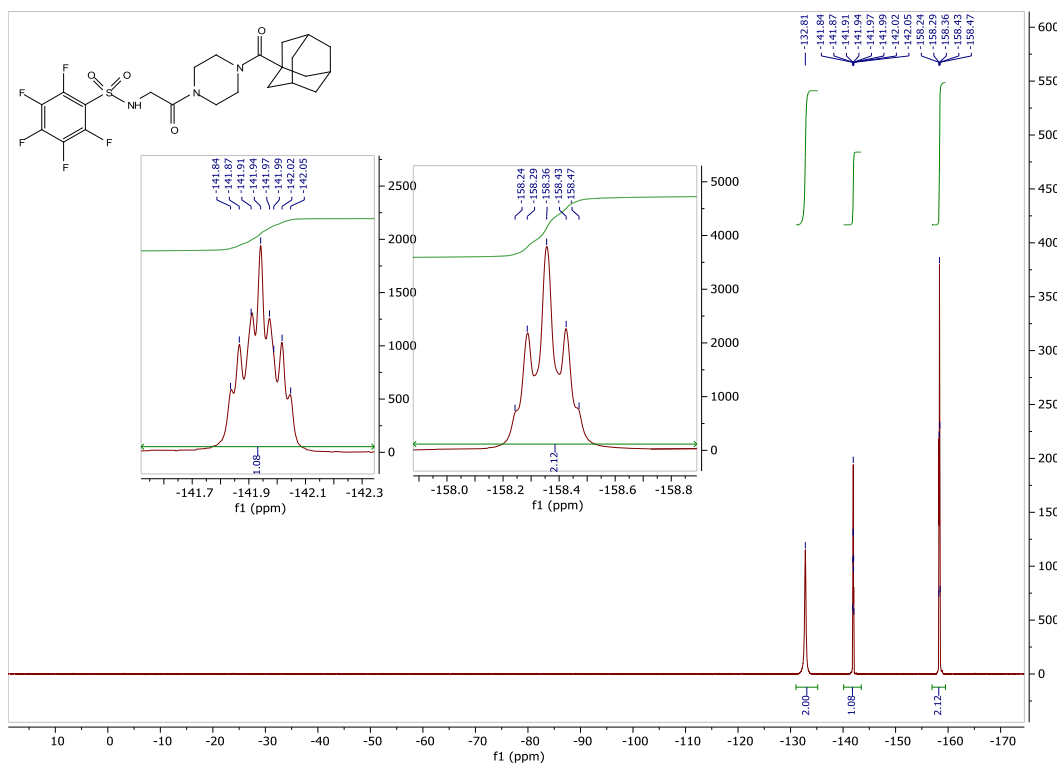

# <sup>1</sup>H NMR (300 MHz, CDCl<sub>3</sub>) Spectra of Compound 7n

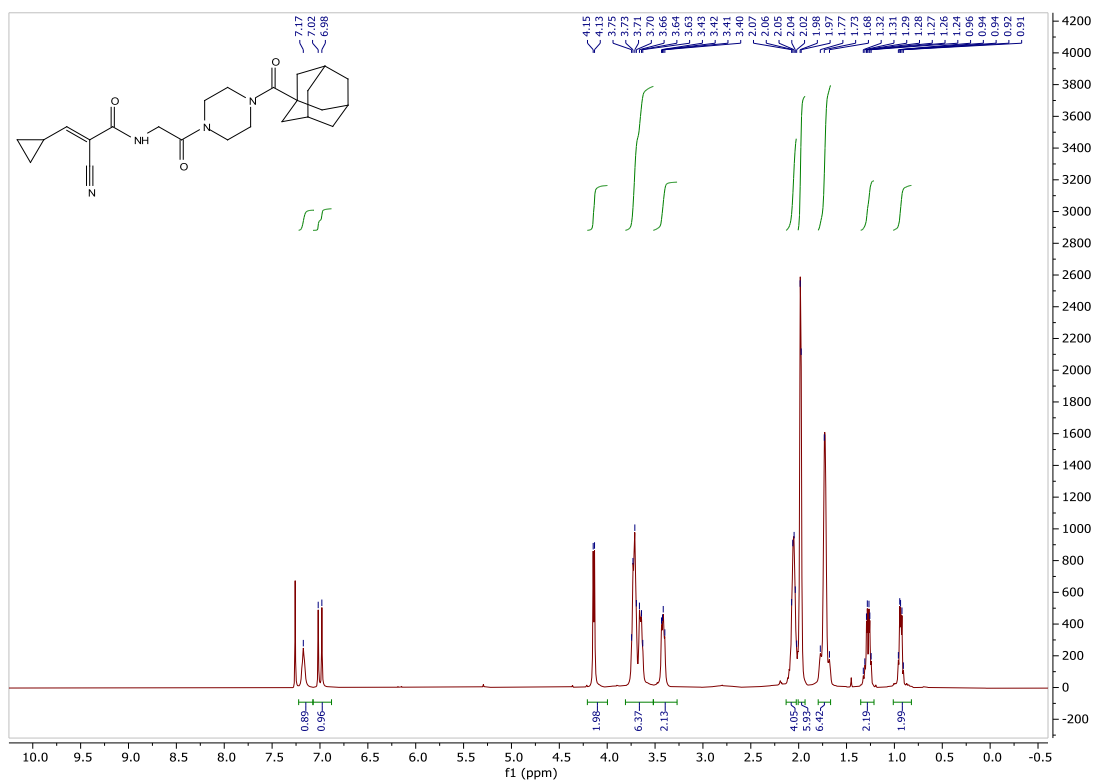

# <sup>13</sup>C NMR (75 MHz, CDCl<sub>3</sub>) Spectra of Compound 7n

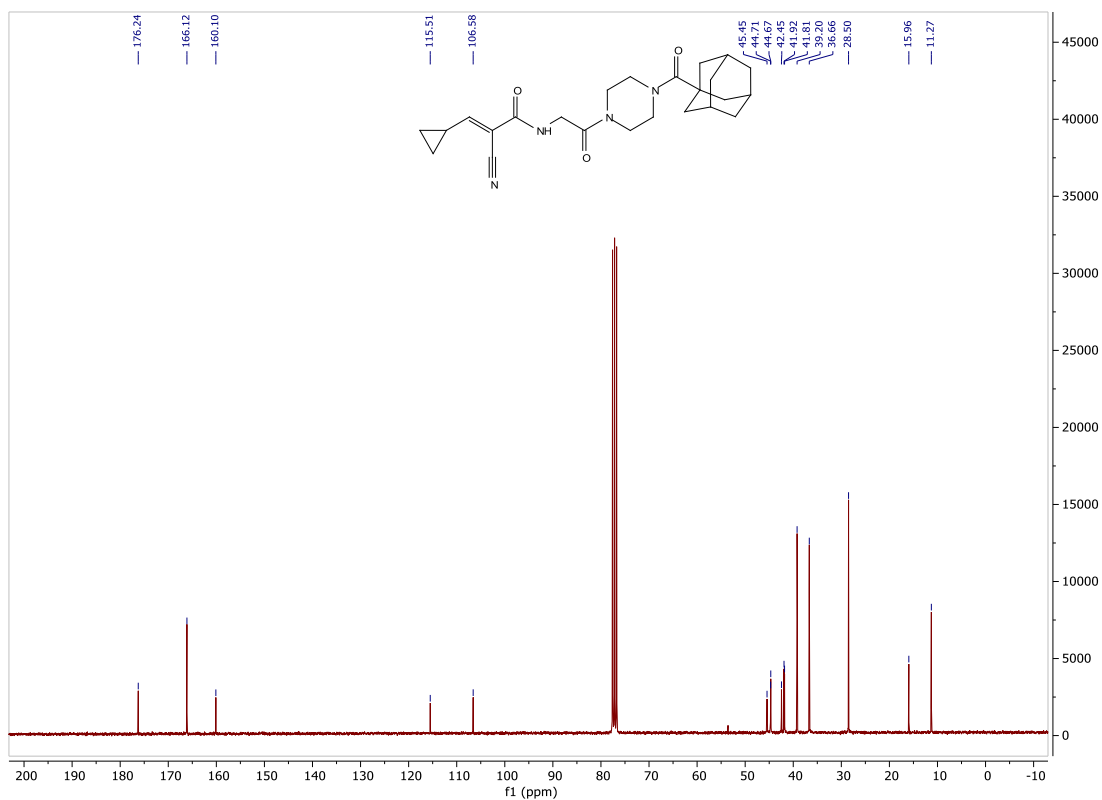

### <sup>1</sup>H NMR (300 MHz, CDCl<sub>3</sub>) Spectra of Compound **7o**

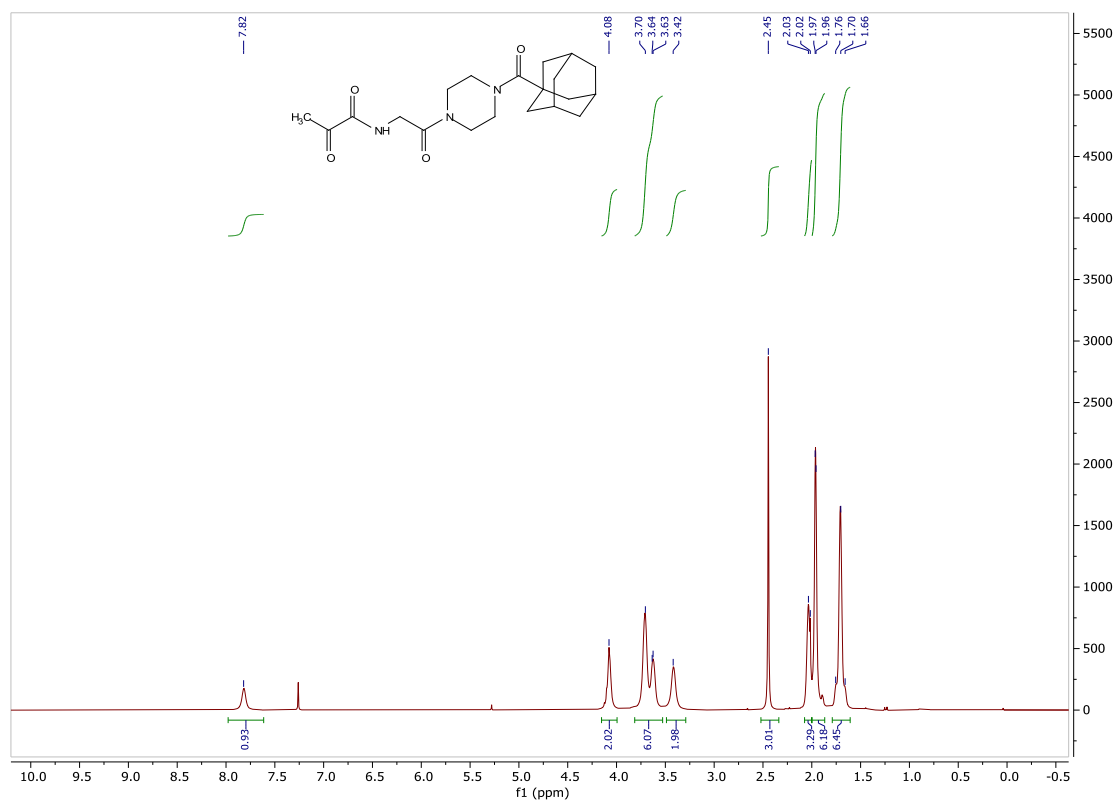

### <sup>13</sup>C NMR (75 MHz, CDCl<sub>3</sub>) Spectra of Compound **7o**

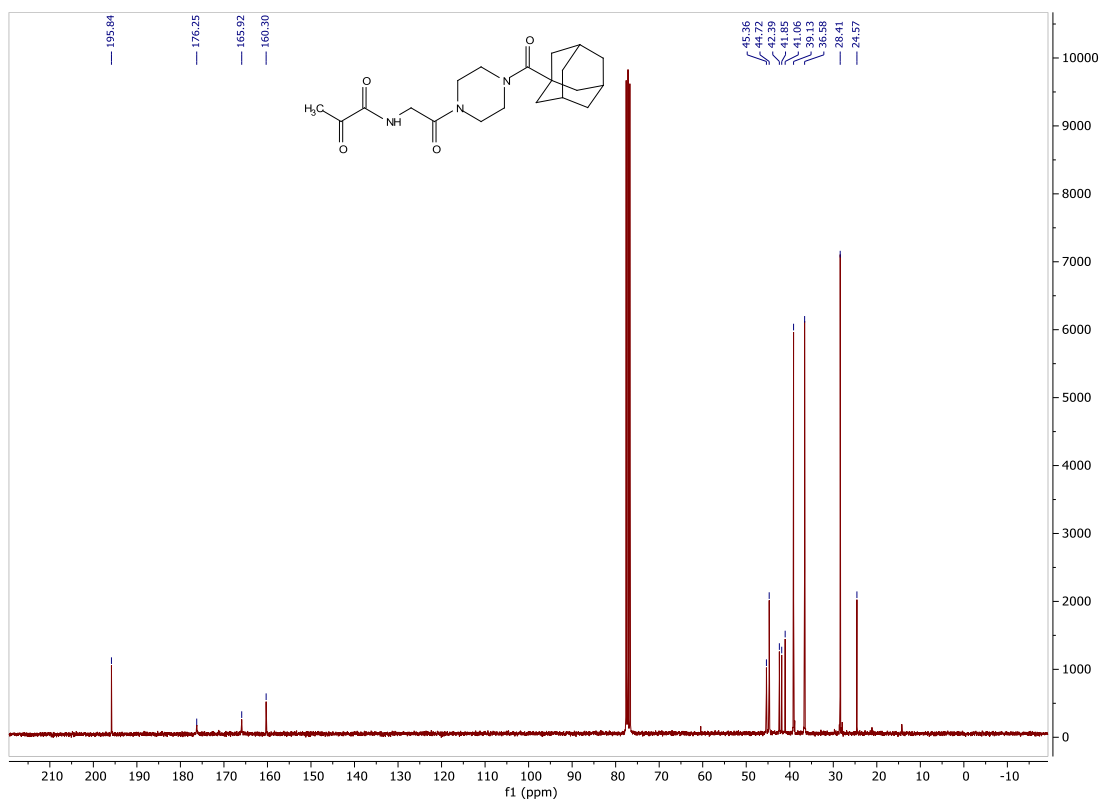

$^1\text{H}$  NMR (300 MHz,  $\text{CDCl}_3$ ) Spectra of Compound **7p**

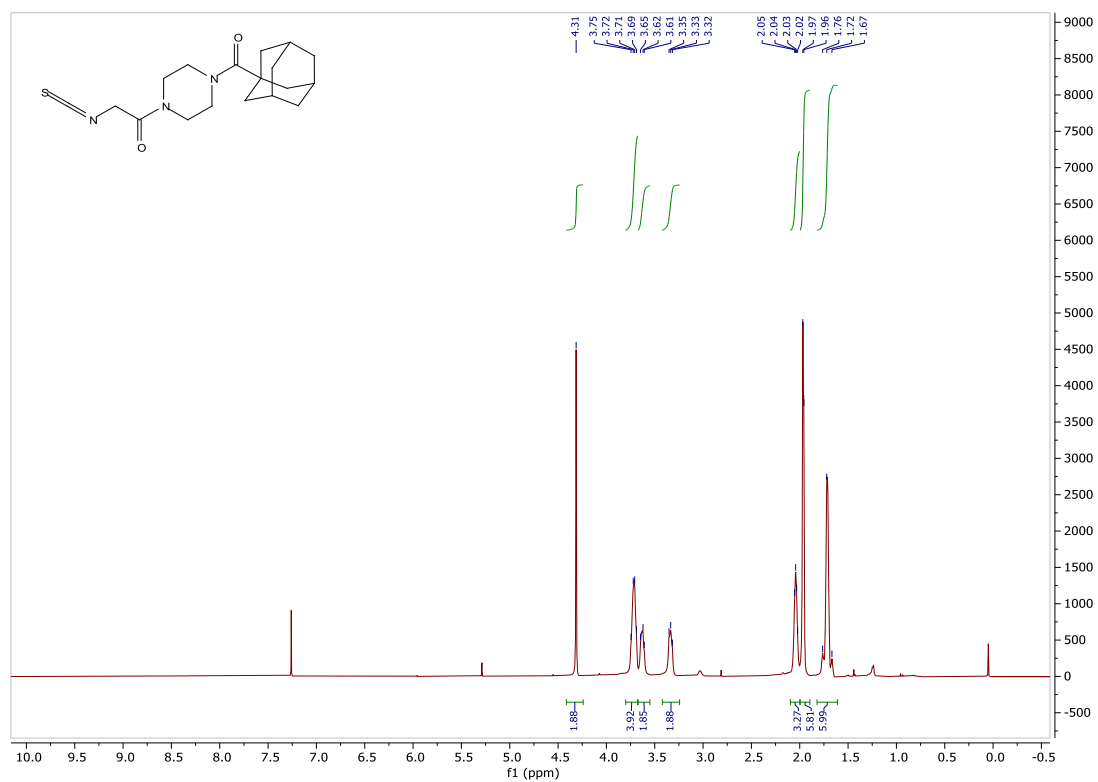

$^{13}\text{C}$  NMR (75 MHz,  $\text{CDCl}_3$ ) Spectra of Compound **7p**

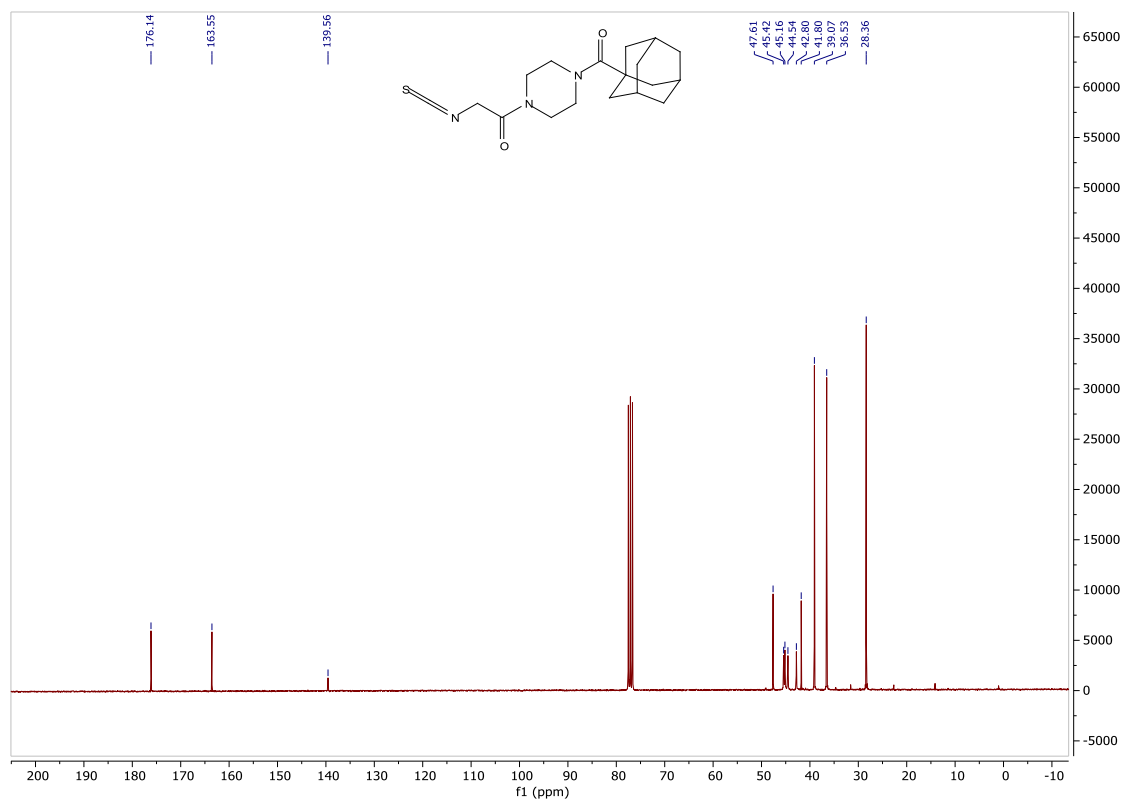



### <sup>1</sup>H NMR (300 MHz, CDCl<sub>3</sub>) Spectra of Compound 7q

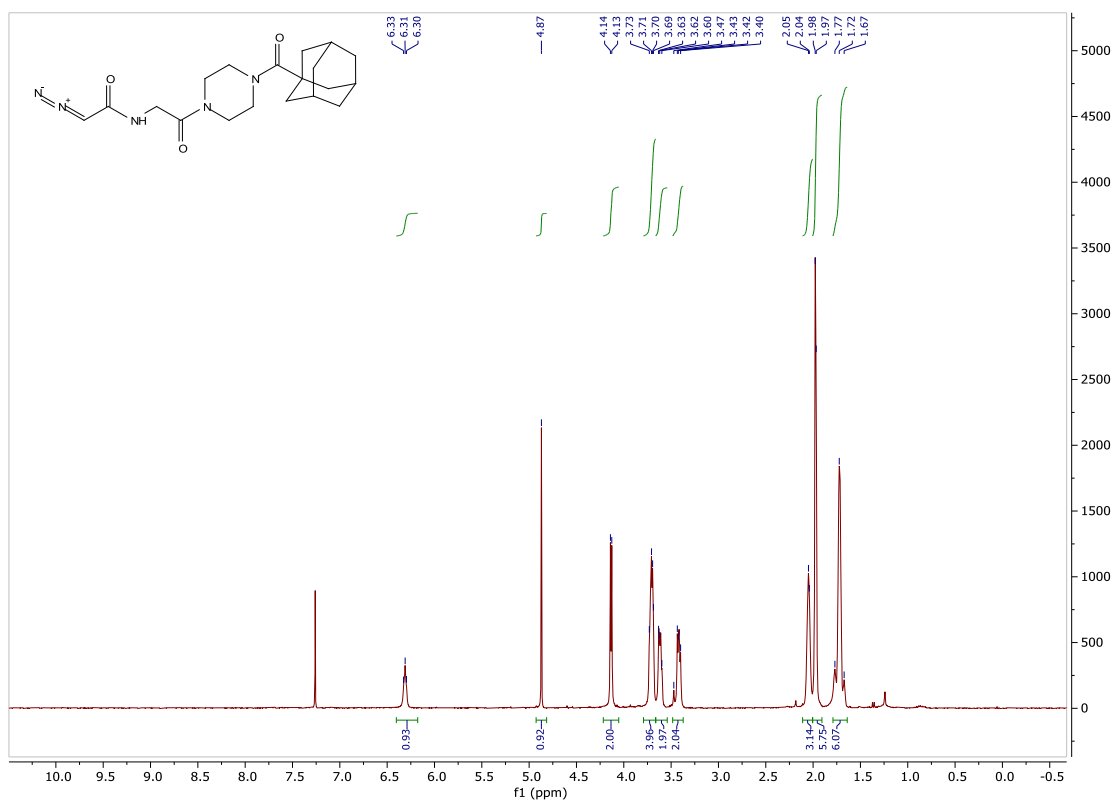

### <sup>13</sup>C NMR (75 MHz, CDCl<sub>3</sub>) Spectra of Compound 7q

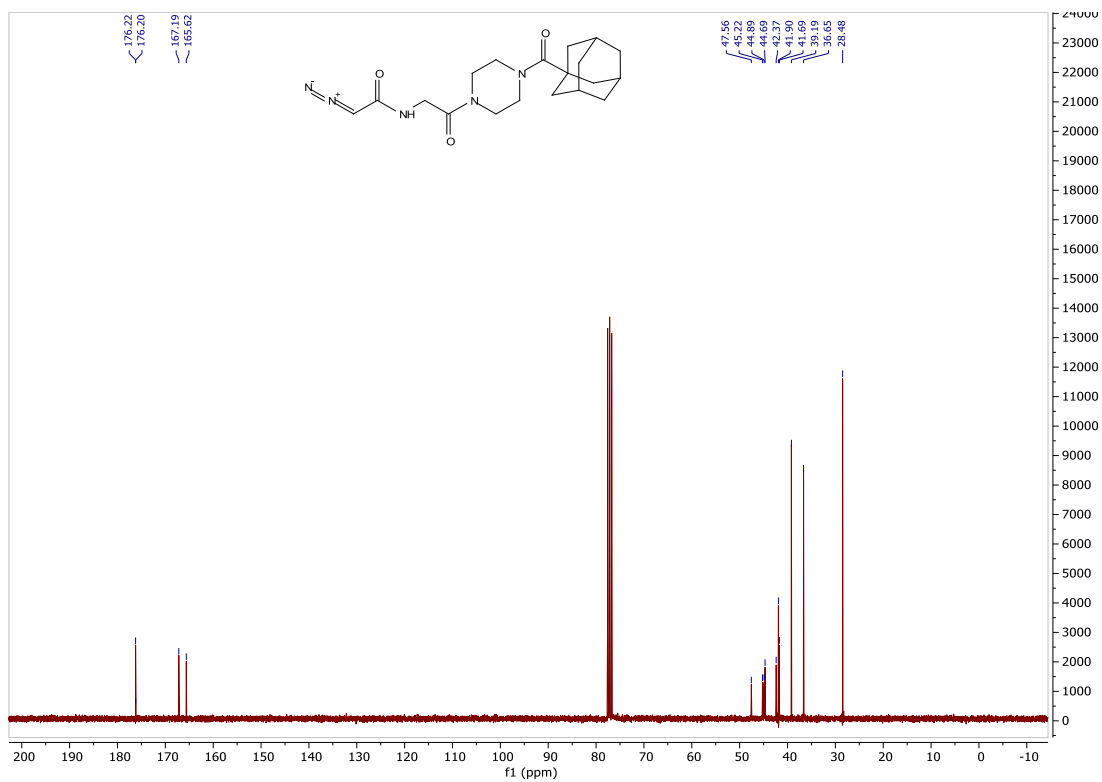

# <sup>1</sup>H NMR (300 MHz, CDCl<sub>3</sub>) Spectra of Compound **I5**

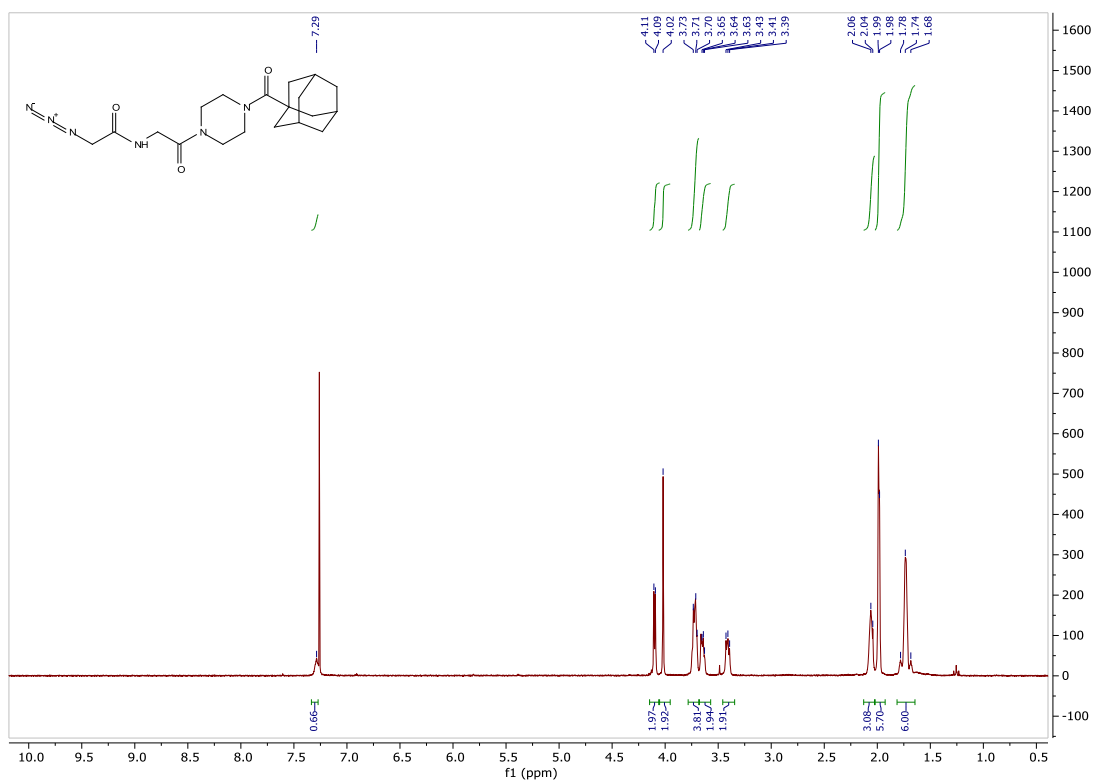

# <sup>13</sup>C NMR (75 MHz, CDCl<sub>3</sub>) Spectra of Compound **I5**

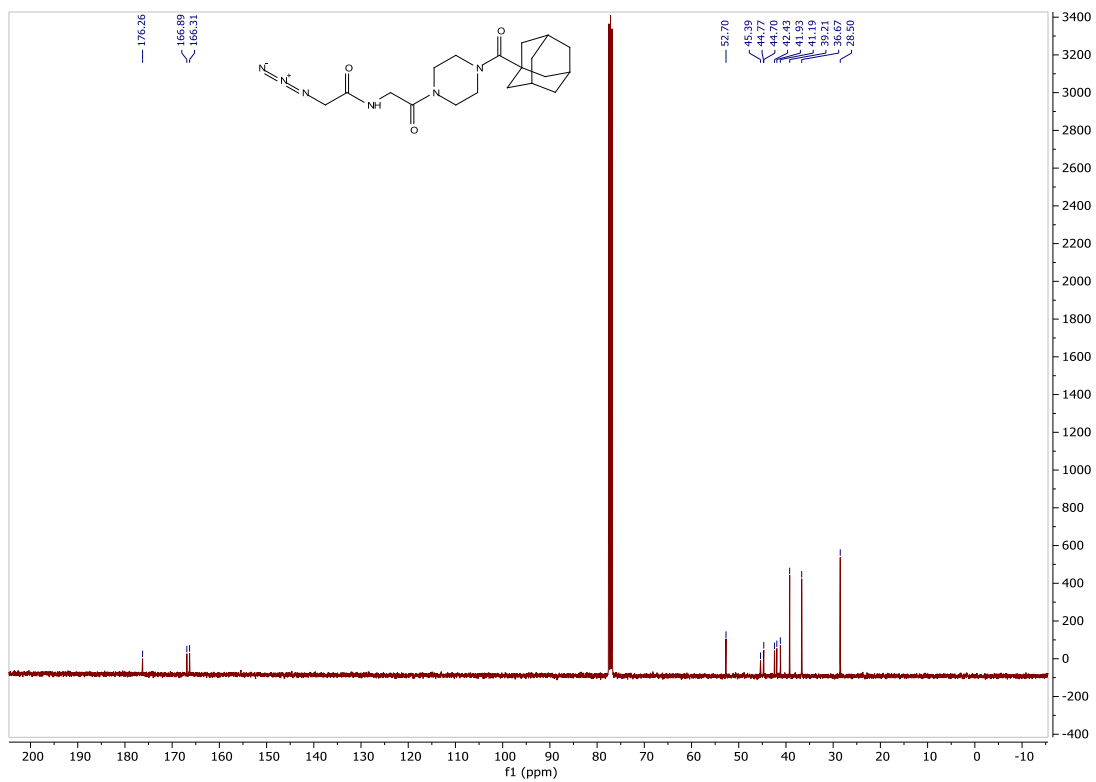

### $^1\text{H}$ NMR (300 MHz, $\text{CDCl}_3$ ) Spectra of Compound **7r**

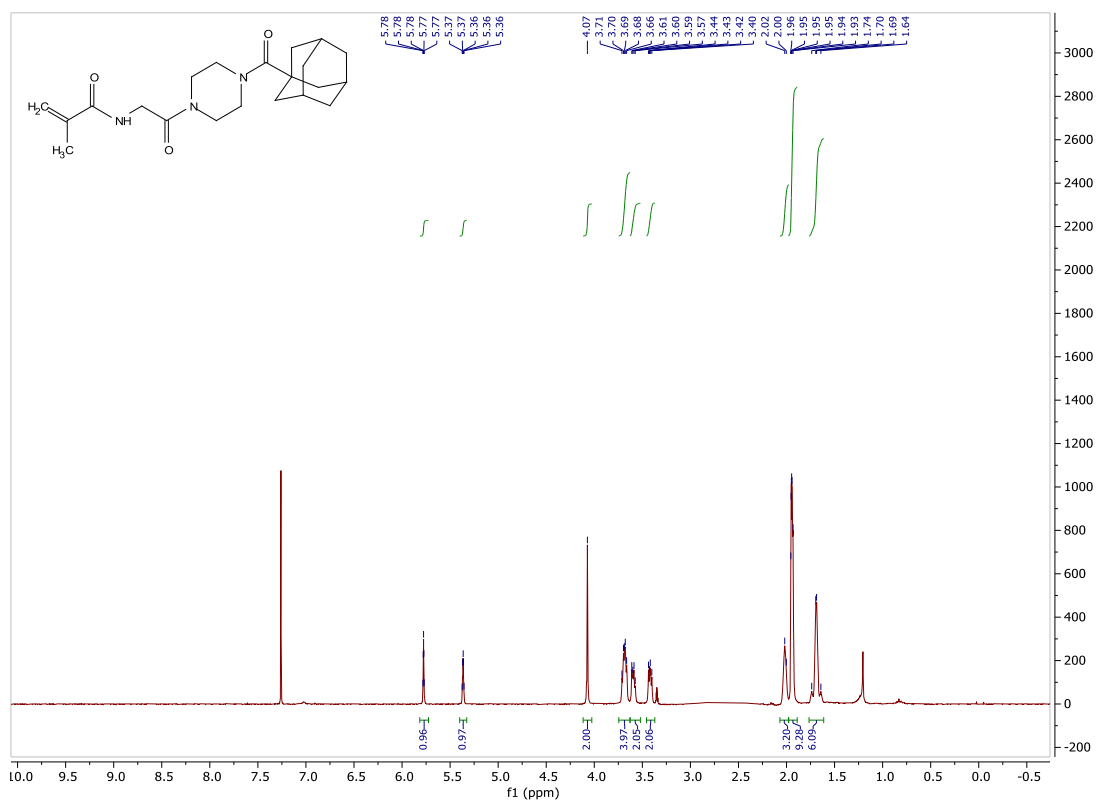

### $^{13}\text{C}$ NMR (75 MHz, $\text{CDCl}_3$ ) Spectra of Compound **7r**

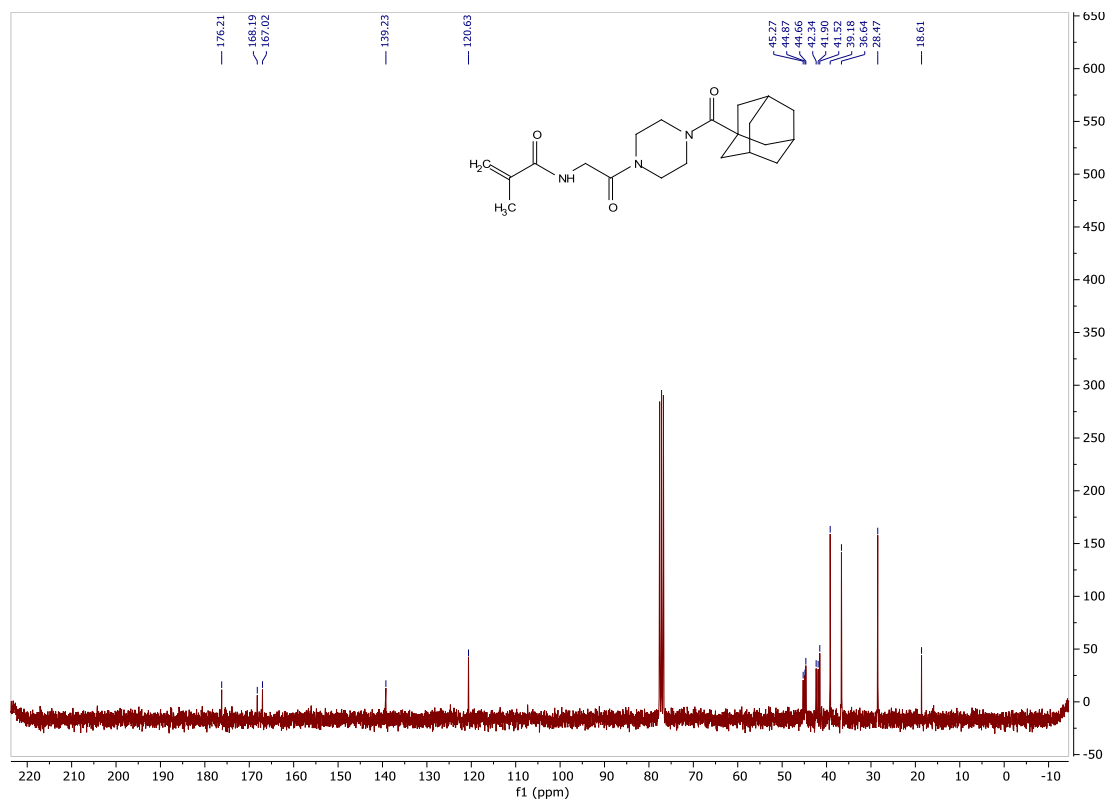

Supplement: d2md00378c1.pdf [file d2md00378c1.pdf]
